# Supplementary material for: The Influence of Irrelevant Visual Distractors on Eye Movement Control in Chinese Children with Autism Spectrum Disorder: Evidence from the Remote Distractor Paradigm
Source: J Autism Dev Disord. 2019 Oct 31;50(2):500–12. doi: 10.1007/s10803-019-04271-y (PMC6994527; doi:10.1007/s10803-019-04271-y)
Supplement: Supplementary file 3 — Supplementary material 3 (CSV 60 kb) [file 10803_2019_4271_MOESM3_ESM.csv]

Participants	Group	Target_position	Saccade_amplitude(��)	Saccade_peak_velocity(��/s)	Saccade_duration(ms)
a296yh	TD	4_D	3.95	890.27	158
a297yh	TD	4_D	20.85	257.54	200
a298yh	TD	4_D	4.23	297.24	54
a299yh	TD	4_D	5.68	277.54	42
a300yh	TD	4_D	3.66	226.93	52
a301yh	TD	4_D	4.05	283.05	50
a302yh	TD	4_D	6.85	230.67	54
a303yh	TD	4_D	4.35	239.98	40
a304yh	TD	4_D	4.6	276.74	40
a305yh	TD	4_D	4.27	267.17	36
a306yh	TD	4_D	4.33	234.38	42
a307yh	TD	4_D	3.53	260.77	50
a308yh	TD	4_D	4.42	264.28	44
a309yh	TD	4_D	4.46	232.45	40
a310yh	TD	4_D	4.57	270.48	54
a311yh	TD	4_D	4.53	257.35	38
a312yh	TD	4_D	3.92	254.2	50
a313yh	TD	4_D	3.5	165.19	32
a314yh	TD	4_D	3.38	253.83	50
a315yh	TD	4_D	4.31	236.15	40
a316yh	TD	4_D	3.53	189.17	38
a317yh	TD	4_D	3.69	234.41	36
a318yh	TD	4_D	3.49	232.78	50
a319yh	TD	4_D	3.97	242.6	38
a320yh	TD	4_D	4.15	223.42	38
a321yh	TD	4_D	3.66	221.12	38
a322yh	TD	4_D	3.66	219.37	38
a323yh	TD	4_D	3.7	155.59	34
a324yh	TD	4_D	3.76	207.43	38
a325yh	TD	4_D	3.53	237.78	52
a326yh	TD	4_D	5.34	252.33	42
a327yh	TD	4_D	3.64	221.3	38
a328yh	TD	4_D	4.78	212.76	42
a329yh	TD	4_D	3.39	189.78	36
a330yh	TD	4_D	3.46	175.33	36
a331yh	TD	4_D	3.38	215.93	34
a332yh	TD	4_D	4.28	247.74	38
a333yh	TD	4_D	4.28	272.27	50
a334yh	TD	4_D	4.29	235.84	38
a335yh	TD	4_D	3.78	227.75	38
a336yh	TD	4_D	3.73	199.39	36
a337yh	TD	4_D	3.57	214.66	38
a338yh	TD	4_D	2.98	223.02	50
a339yh	TD	4_D	3.86	191.79	38
a340yh	TD	4_D	3.61	268.34	54
a341yh	TD	4_D	4.41	213.36	38
a342yh	TD	4_D	3.11	208.8	34
a343yh	TD	4_D	4.06	213.29	40
a344yh	TD	4_D	4.16	190.75	42
a345yh	TD	4_D	3.58	190.37	36
a346yh	TD	4_D	3.97	243.22	52
a347yh	TD	4_D	3.71	212.08	36
a348yh	TD	4_D	3.47	203.67	36
a349yh	TD	4_D	3.17	204.8	34
a350yh	TD	4_D	3.86	262.63	52
a351yh	TD	4_D	3.11	203.73	34
a352yh	TD	4_D	3.96	229.54	36
a353yh	TD	4_D	3.19	216.48	38
a354yh	TD	4_D	3.47	219.37	48
a355yh	TD	4_D	3.84	228.72	36
a356yh	TD	4_D	3.65	218.35	36
a357yh	TD	4_D	4.6	199.59	44
a358yh	TD	4_D	3.93	203.53	34
a359yh	TD	4_D	3.41	191.3	36
a360yh	TD	4_D	3.1	190.37	36
a361yh	TD	4_D	3.22	189.75	36
a362yh	TD	4_D	3.56	237.47	52
a363yh	TD	4_D	3.52	222.76	38
a364yh	TD	4_D	3.31	211.67	36
a365yh	TD	4_D	3.18	183.94	36
a366yh	TD	4_D	3.57	179.92	38
a367yh	TD	4_D	3.62	196.81	38
a368yh	TD	4_D	3.9	224.76	36
a369yh	TD	4_D	3.04	195.43	32
a370yh	TD	4_D	2.96	175.4	36
a371yh	TD	4_D	2.89	194.55	34
a372yh	TD	4_D	3.41	178.98	38
a373yh	TD	4_D	2.7	175.2	50
a374yh	TD	4_D	4.52	204.36	40
a375yh	TD	4_D	3.37	194.06	36
a376yh	TD	4_D	3.61	181.83	36
a377yh	TD	4_D	4.21	203.31	40
a378yh	TD	4_D	3.25	194.18	36
a379yh	TD	4_D	3.71	201.76	40
a380yh	TD	4_D	4.37	233.77	42
a381yh	TD	4_D	2.94	193.41	36
a382yh	TD	4_D	3.74	160.22	38
a383yh	TD	4_D	4.17	202.01	38
a384yh	TD	4_D	3.06	209.06	38
a385yh	TD	4_D	3.51	159.35	36
a386yh	TD	4_D	3.17	175.31	34
a387yh	TD	4_D	2.87	189.05	34
a388yh	TD	4_D	3.21	204.34	36
a389yh	TD	4_D	2.86	207.4	46
a390yh	TD	4_D	2.86	188.1	32
a391yh	TD	4_D	4.06	193	40
a392yh	TD	4_D	3.44	177.52	38
a393yh	TD	4_D	3.66	231.45	38
a394yh	TD	4_D	3.34	178.29	36
a395yh	TD	4_D	2.95	170.72	36
a396yh	TD	4_D	4.08	192.06	40
a397yh	TD	4_D	3.47	197.32	36
a398yh	TD	4_D	3.1	169.81	38
a399yh	TD	4_D	3.08	184.15	32
a400yh	TD	4_D	3.23	189.41	36
a401yh	TD	4_D	2.93	183.28	34
a402yh	TD	4_D	3.15	195.98	38
a403yh	TD	4_D	3.13	155.22	36
a404yh	TD	4_D	3.3	180.12	36
a405yh	TD	4_D	3.26	194.5	38
a406yh	TD	4_D	3.04	167.55	36
a407yh	TD	4_D	3.35	213.63	48
a408yh	TD	4_D	3.29	178.62	36
a409yh	TD	4_D	3.16	169.2	36
a410yh	TD	4_D	3.68	153.7	34
a411yh	TD	4_D	2.83	167.02	34
a412yh	TD	4_D	3.09	184.82	36
a413yh	TD	4_D	3	166.17	34
a414yh	TD	4_D	2.84	195.8	34
a415yh	TD	4_D	3.35	194.67	36
a416yh	TD	4_D	3.64	225.47	38
a417yh	TD	4_D	3.15	167.27	34
a418yh	TD	4_D	2.92	152.05	34
a419yh	TD	4_D	3.21	176.96	34
a420yh	TD	4_D	3.45	235.67	50
a421yh	TD	4_D	3.56	191.27	36
a422yh	TD	4_D	3.01	197.06	50
a423yh	TD	4_D	3.35	196.9	36
a424yh	TD	4_D	3.28	181.8	36
a425yh	TD	4_D	2.76	163.57	34
a426yh	TD	4_D	3.24	174.19	34
a427yh	TD	4_D	3.17	181.14	34
a428yh	TD	4_D	2.94	149.68	34
a429yh	TD	4_D	3.71	189.29	40
a430yh	TD	4_D	3.59	191.4	38
a431yh	TD	4_D	3.37	173.95	36
a432yh	TD	4_D	3.4	231.19	36
a433yh	TD	4_D	2.76	190.03	36
a434yh	TD	4_D	2.39	130.91	28
a435yh	TD	4_D	3.23	208.43	36
a436yh	TD	4_D	3.64	230.44	38
a437yh	TD	4_D	3.28	162.02	36
a438yh	TD	4_D	3.6	187.12	38
a439yh	TD	4_D	2.5	169.94	32
a440yh	TD	4_D	3.62	189.64	36
a441yh	TD	4_D	3.19	191.35	36
a442yh	TD	4_D	3.38	167.85	36
a443yh	TD	4_D	3.62	220.2	38
a444yh	TD	4_D	3.19	168.74	32
a445yh	TD	4_D	2.84	129.68	32
a446yh	TD	4_D	3.05	168.66	32
a447yh	TD	4_D	3.34	160.53	36
a448yh	TD	4_D	3.14	183.14	36
a449yh	TD	4_D	3.72	177.05	42
a450yh	TD	4_D	3.56	227.65	36
a451yh	TD	4_D	3.09	160.31	36
a452yh	TD	4_D	3.39	186.04	36
a453yh	TD	4_D	2.7	188.88	36
a454yh	TD	4_D	3.6	225.99	52
a455yh	TD	4_D	3.9	205.57	38
a456yh	TD	4_D	3.12	169.01	38
a457yh	TD	4_D	2.95	165.56	36
a458yh	TD	4_D	3.22	204.51	38
a459yh	TD	4_D	3.23	187.53	34
a460yh	TD	4_D	2.65	127.87	30
a461yh	TD	4_D	3.2	158.27	36
a462yh	TD	4_D	3.17	165.29	34
a463yh	TD	4_D	3.16	168.65	34
a464yh	TD	4_D	3.34	168.49	36
a465yh	TD	4_D	3.52	186.83	34
a466yh	TD	4_D	3.19	183.59	36
a467yh	TD	4_D	2.45	183.44	36
a468yh	TD	4_D	3.64	203.68	38
a469yh	TD	4_D	2.93	168.1	34
a470yh	TD	4_D	4.2	204.04	40
a471yh	TD	4_D	3.04	164.54	34
a472yh	TD	4_D	2.97	157.33	36
a473yh	TD	4_D	3.01	167.68	34
a474yh	TD	4_D	3.01	156.69	36
a475yh	TD	4_D	2.6	157.02	34
a476yh	TD	4_D	2.97	172.61	36
a477yh	TD	4_D	3.41	163.79	34
a478yh	TD	4_D	2.64	181.56	36
a479yh	TD	4_D	3.75	220.86	38
a480yh	TD	4_D	2.85	156.28	36
a481yh	TD	4_D	2.78	126.09	30
a482yh	TD	4_D	3.17	155.65	36
a483yh	TD	4_D	4.05	202.48	40
a484yh	TD	4_D	3	219.97	46
a485yh	TD	4_D	2.9	154.93	36
a486yh	TD	4_D	3.48	183.09	38
a487yh	TD	4_D	3.46	213.86	38
a488yh	TD	4_D	2.64	178.78	36
a489yh	TD	4_D	3.34	167.68	34
a490yh	TD	4_D	2.36	157.6	32
a491yh	TD	4_D	2.8	154.1	34
a492yh	TD	4_D	2.22	156.25	32
a493yh	TD	4_D	3.4	160.23	34
a494yh	TD	4_D	2.67	155.67	30
a495yh	TD	4_D	2.51	176.42	36
a496yh	TD	4_D	2.97	138.82	30
a497yh	TD	4_D	3.15	162.5	36
a498yh	TD	4_D	2.92	141.94	32
a499yh	TD	4_D	3.34	167.11	34
a500yh	TD	4_D	3.14	175.32	38
a501yh	TD	4_D	2.95	175.84	34
a502yh	TD	4_D	2.42	175.1	34
a503yh	TD	4_D	3.22	158.76	34
a504yh	TD	4_D	3.82	175.2	34
a505yh	TD	4_D	3.82	196.45	38
a506yh	TD	4_D	3.59	198	38
a507yh	TD	4_D	2.57	152.32	30
a508yh	TD	4_D	3.62	179.2	36
a509yh	TD	4_D	2.87	136.84	36
a510yh	TD	4_D	2.81	149.15	34
a511yh	TD	4_D	3.53	178.58	36
a512yh	TD	4_D	2.61	137.54	28
a513yh	TD	4_D	2.97	150.23	32
a514yh	TD	4_D	3.71	136.03	36
a515yh	TD	4_D	3.35	161.06	36
a516yh	TD	4_D	3.26	174.96	34
a517yh	TD	4_D	3.32	148	36
a518yh	TD	4_D	2.98	208.65	36
a519yh	TD	4_D	2.67	171.45	34
a520yh	TD	4_D	2.71	147.28	36
a521yh	TD	4_D	2.7	170.49	34
a522yh	TD	4_D	3.74	208.57	40
a523yh	TD	4_D	2.92	162.74	34
a524yh	TD	4_D	3.1	207.46	34
a525yh	TD	4_D	3.01	173.06	34
a526yh	TD	4_D	3.27	157.64	34
a527yh	TD	4_D	2.24	119.79	28
a528yh	TD	4_D	3.36	176.27	38
a529yh	TD	4_D	3.03	154.8	34
a530yh	TD	4_D	3.42	206.53	38
a531yh	TD	4_D	2.76	145.41	32
a532yh	TD	4_D	2.95	206.12	36
a533yh	TD	4_D	3.29	170.52	38
a534yh	TD	4_D	2.78	133.15	30
a535yh	TD	4_D	3.24	160.41	34
a536yh	TD	4_D	2.39	145.02	32
a537yh	TD	4_D	2.97	169.39	34
a538yh	TD	4_D	2.63	131.84	28
a539yh	TD	4_D	3.13	170.22	34
a540yh	TD	4_D	2.57	143.26	34
a541yh	TD	4_D	3.19	168.27	32
a542yh	TD	4_D	2.62	164.51	34
a543yh	TD	4_D	2.38	153.41	36
a544yh	TD	4_D	2.11	116.9	26
a545yh	TD	4_D	2.19	116.88	26
a546yh	TD	4_D	2.47	130.23	32
a547yh	TD	4_D	2.78	130.17	30
a548yh	TD	4_D	3.23	200.31	38
a549yh	TD	4_D	3.51	168.49	38
a550yh	TD	4_D	2.48	116.1	28
a551yh	TD	4_D	3.79	171.42	40
a552yh	TD	4_D	2.74	129.27	30
a553yh	TD	4_D	4.2	190.3	38
a554yh	TD	4_D	3.1	150.18	32
a555yh	TD	4_D	2.53	161.72	34
a556yh	TD	4_D	3.14	165.43	36
a557yh	TD	4_D	3.54	189.67	36
a558yh	TD	4_D	2.13	143.01	32
a559yh	TD	4_D	2.29	160.72	34
a560yh	TD	4_D	2.84	160.18	32
a561yh	TD	4_D	2.11	114.65	62
a562yh	TD	4_D	3.21	148.96	34
a563yh	TD	4_D	3.44	199.97	38
a564yh	TD	4_D	3.32	199.7	36
a565yh	TD	4_D	2.45	140.77	32
a566yh	TD	4_D	2.78	140.4	32
a567yh	TD	4_D	2.68	125.5	34
a568yh	TD	4_D	2.76	125.5	30
a569yh	TD	4_D	3.35	182.78	36
a570yh	TD	4_D	2.65	124.88	30
a571yh	TD	4_D	2.6	145.08	32
a572yh	TD	4_D	3.35	191.55	36
a573yh	TD	4_D	3.03	147	32
a574yh	TD	4_D	3.14	166.3	38
a575yh	TD	4_D	2.93	146.72	32
a576yh	TD	4_D	3.85	163.01	38
a577yh	TD	4_D	3.13	196.16	36
a578yh	TD	4_D	2.65	153.32	34
a579yh	TD	4_D	2.23	111.03	28
a580yh	TD	4_D	2.45	137.1	30
a581yh	TD	4_D	2.64	187.28	48
a582yh	TD	4_D	2.61	155.23	34
a583yh	TD	4_D	3.06	161.53	34
a584yh	TD	4_D	3.48	161.48	38
a585yh	TD	4_D	2.2	110.89	28
a586yh	TD	4_D	2.22	121.04	30
a587yh	TD	4_D	2.92	156.47	36
a588yh	TD	4_D	3.05	184.95	36
a589yh	TD	4_D	3.09	162.42	34
a590yh	TD	4_D	2.89	193.1	36
a591yh	TD	4_D	2.56	120.25	30
a592yh	TD	4_D	2.98	192.94	34
a593yh	TD	4_D	2.67	152.39	32
a594yh	TD	4_D	3.46	192.59	36
a595yh	TD	4_D	3.04	161.22	36
a596yh	TD	4_D	2.79	143.64	32
a597yh	TD	4_D	2.7	140.7	32
a598yh	TD	4_D	3.13	153.68	34
a599yh	TD	4_D	2.43	139.19	32
a600yh	TD	4_D	2.52	153.13	34
a601yh	TD	4_D	3.5	179.72	38
a602yh	TD	4_D	2.59	149.33	32
a603yh	TD	4_D	3.34	159.72	36
a604yh	TD	4_D	3.21	152.66	34
a605yh	TD	4_D	2.96	173.91	34
a606yh	TD	4_D	3.24	126.52	38
a607yh	TD	4_D	3.13	141.18	34
a608yh	TD	4_D	2.72	126.13	30
a609yh	TD	4_D	2.55	131.63	30
a610yh	TD	4_D	3.08	189.02	36
a611yh	TD	4_D	2.44	150.98	36
a612yh	TD	4_D	2.65	137.56	32
a613yh	TD	4_D	3.03	150.5	32
a614yh	TD	4_D	2.35	138.44	32
a615yh	TD	4_D	3.19	155.47	34
a616yh	TD	4_D	2.82	122.95	36
a617yh	TD	4_D	2.05	122.92	30
a618yh	TD	4_D	3.29	155.08	32
a619yh	TD	4_D	3.49	154.73	40
a620yh	TD	4_D	3.68	155.6	38
a621yh	TD	4_D	2.71	135.1	30
a622yh	TD	4_D	3.09	175.4	34
a623yh	TD	4_D	2.48	136.25	30
a624yh	TD	4_D	3.62	154.49	34
a625yh	TD	4_D	2.82	171.62	34
a626yh	TD	4_D	2.45	127.28	28
a627yh	TD	4_D	2.16	135.19	32
a628yh	TD	4_D	2.66	133.38	30
a629yh	TD	4_D	3.39	152.07	38
a630yh	TD	4_D	2.53	109.87	30
a631yh	TD	4_D	2.91	142.88	30
a632yh	TD	4_D	2.42	123.84	30
a633yh	TD	4_D	2.93	129.61	32
a634yh	TD	4_D	2.37	116.03	30
a635yh	TD	4_D	2.57	140.27	34
a636yh	TD	4_D	2.27	127.35	30
a637yh	TD	4_D	3.04	168.61	34
a638yh	TD	4_D	2.24	113.06	30
a639yh	TD	4_D	2.94	167.3	34
a640yh	TD	4_D	2.87	143.27	34
a641yh	TD	4_D	2.88	153.98	32
a642yh	TD	4_D	2.82	161.61	32
a643yh	TD	4_D	3.08	160.81	34
a644yh	TD	4_D	2.03	116.81	30
a645yh	TD	4_D	3.25	140.08	32
a646yh	TD	4_D	2.24	115.74	28
a647yh	TD	4_D	3.22	148.14	40
a648yh	TD	4_D	2.74	134.39	36
a649yh	TD	4_D	2.55	133.85	30
a650yh	TD	4_D	3.09	133	36
a651yh	TD	4_D	2.5	143.89	34
a652yh	TD	4_D	2.06	122.7	34
a965yh	TD	8_D	7.91	913.03	134
a966yh	TD	8_D	7.59	528.03	164
a967yh	TD	8_D	7.39	751.82	120
a968yh	TD	8_D	9.06	387.65	62
a969yh	TD	8_D	7.54	394.26	48
a970yh	TD	8_D	10.42	469.81	52
a971yh	TD	8_D	9.22	470.52	74
a972yh	TD	8_D	8.8	458.05	72
a973yh	TD	8_D	7.76	331.53	74
a974yh	TD	8_D	8.36	433.54	62
a975yh	TD	8_D	8.12	360.34	58
a976yh	TD	8_D	8.53	423.16	70
a977yh	TD	8_D	9.02	412.88	50
a978yh	TD	8_D	9.67	346.88	56
a979yh	TD	8_D	6.75	378.26	54
a980yh	TD	8_D	7.2	342.33	46
a981yh	TD	8_D	7.26	360.66	44
a982yh	TD	8_D	7.47	362.41	48
a983yh	TD	8_D	7.98	348.69	48
a984yh	TD	8_D	7.42	358.98	46
a985yh	TD	8_D	8.1	371.81	46
a986yh	TD	8_D	6.64	369.44	40
a987yh	TD	8_D	8.45	344.13	50
a988yh	TD	8_D	8.83	367.18	56
a989yh	TD	8_D	8.58	289.2	54
a990yh	TD	8_D	7.8	325.14	46
a991yh	TD	8_D	7.25	339.82	46
a992yh	TD	8_D	7.13	362.86	56
a993yh	TD	8_D	7.19	324.74	46
a994yh	TD	8_D	8.06	286.5	52
a995yh	TD	8_D	8.43	303.5	54
a996yh	TD	8_D	8.57	328.05	50
a997yh	TD	8_D	7.83	343.72	48
a998yh	TD	8_D	7.83	359.26	48
a999yh	TD	8_D	7.53	358.19	44
a1000yh	TD	8_D	7.39	384.08	58
a1001yh	TD	8_D	7.42	325.35	50
a1002yh	TD	8_D	7.05	357.34	46
a1003yh	TD	8_D	8.35	357.25	48
a1004yh	TD	8_D	6.43	289.33	46
a1005yh	TD	8_D	7.8	299.64	50
a1006yh	TD	8_D	7.66	331.54	50
a1007yh	TD	8_D	7.55	446.25	74
a1008yh	TD	8_D	6.79	314.99	42
a1009yh	TD	8_D	8.2	322.39	50
a1010yh	TD	8_D	6.6	319.66	46
a1011yh	TD	8_D	7.39	328.25	48
a1012yh	TD	8_D	7.33	328.13	46
a1013yh	TD	8_D	6.52	229.9	54
a1014yh	TD	8_D	6.84	373.26	68
a1015yh	TD	8_D	7.78	331.9	50
a1016yh	TD	8_D	7.69	274.12	52
a1017yh	TD	8_D	7.14	371.72	44
a1018yh	TD	8_D	6.68	273.42	48
a1019yh	TD	8_D	5.93	225.31	44
a1020yh	TD	8_D	5.43	363.73	82
a1021yh	TD	8_D	6.59	277.79	50
a1022yh	TD	8_D	6.47	321.65	44
a1023yh	TD	8_D	7.14	343.03	46
a1024yh	TD	8_D	6.45	303.08	46
a1025yh	TD	8_D	7.03	324.29	46
a1026yh	TD	8_D	6.71	301.9	46
a1027yh	TD	8_D	6.75	369.98	42
a1028yh	TD	8_D	6.55	369.09	42
a1029yh	TD	8_D	7.07	300.16	46
a1030yh	TD	8_D	8.01	321.16	50
a1031yh	TD	8_D	8.6	358.57	62
a1032yh	TD	8_D	8.16	298.6	52
a1033yh	TD	8_D	6.8	297.76	46
a1034yh	TD	8_D	7.18	264.29	50
a1035yh	TD	8_D	5.81	298.05	42
a1036yh	TD	8_D	6.97	338.27	44
a1037yh	TD	8_D	7.32	319.18	48
a1038yh	TD	8_D	5.59	306.18	42
a1039yh	TD	8_D	7.14	337.37	46
a1040yh	TD	8_D	7.46	304.99	50
a1041yh	TD	8_D	6.49	296.09	44
a1042yh	TD	8_D	7.37	281.34	52
a1043yh	TD	8_D	7.23	316.33	46
a1044yh	TD	8_D	5.78	269.64	42
a1045yh	TD	8_D	6.58	333.89	42
a1046yh	TD	8_D	6.5	293.35	48
a1047yh	TD	8_D	7.25	217.74	58
a1048yh	TD	8_D	6.69	332.48	44
a1049yh	TD	8_D	7.98	216.72	60
a1050yh	TD	8_D	7.23	331.94	44
a1051yh	TD	8_D	6.7	291.4	46
a1052yh	TD	8_D	6.88	331.84	44
a1053yh	TD	8_D	6.61	265.83	46
a1054yh	TD	8_D	7.97	407.85	70
a1055yh	TD	8_D	6.27	331.66	42
a1056yh	TD	8_D	7.31	287.72	48
a1057yh	TD	8_D	7.63	406.41	58
a1058yh	TD	8_D	6.95	329.06	46
a1059yh	TD	8_D	5.57	306.52	40
a1060yh	TD	8_D	5.19	327.36	54
a1061yh	TD	8_D	7.07	402.47	56
a1062yh	TD	8_D	7.2	295.71	50
a1063yh	TD	8_D	7.88	273.74	54
a1064yh	TD	8_D	6.12	343.93	40
a1065yh	TD	8_D	7.35	399.55	58
a1066yh	TD	8_D	7.5	305.12	48
a1067yh	TD	8_D	6.92	269.94	50
a1068yh	TD	8_D	6.99	304.13	48
a1069yh	TD	8_D	6.23	281.78	44
a1070yh	TD	8_D	7.64	398.43	74
a1071yh	TD	8_D	7.31	271.88	52
a1072yh	TD	8_D	6.77	209.58	54
a1073yh	TD	8_D	7	302.79	48
a1074yh	TD	8_D	6.6	302.53	46
a1075yh	TD	8_D	6.17	339.56	40
a1076yh	TD	8_D	6.73	279.3	46
a1077yh	TD	8_D	6.16	338.09	40
a1078yh	TD	8_D	6.56	301.38	46
a1079yh	TD	8_D	7.04	290.29	50
a1080yh	TD	8_D	6.15	299.06	44
a1081yh	TD	8_D	6.62	321.07	48
a1082yh	TD	8_D	6.97	300.41	46
a1083yh	TD	8_D	5.89	255.83	44
a1084yh	TD	8_D	5.99	276.52	42
a1085yh	TD	8_D	5.97	288.66	44
a1086yh	TD	8_D	7.36	298.01	48
a1087yh	TD	8_D	8.16	388.38	46
a1088yh	TD	8_D	8.15	332.99	52
a1089yh	TD	8_D	6.36	274.32	46
a1090yh	TD	8_D	6.08	318.42	44
a1091yh	TD	8_D	6.3	262.9	50
a1092yh	TD	8_D	6.23	273.92	46
a1093yh	TD	8_D	7.99	275.45	52
a1094yh	TD	8_D	6.43	293.68	48
a1095yh	TD	8_D	6.2	272.54	44
a1096yh	TD	8_D	6.77	296.48	46
a1097yh	TD	8_D	6.78	326.9	44
a1098yh	TD	8_D	6.49	242.31	48
a1099yh	TD	8_D	7.47	264.75	52
a1100yh	TD	8_D	6.12	273.52	44
a1101yh	TD	8_D	6.54	310.11	42
a1102yh	TD	8_D	5.88	291.38	44
a1103yh	TD	8_D	8.27	263.02	56
a1104yh	TD	8_D	6.61	324.47	44
a1105yh	TD	8_D	6.35	248.89	46
a1106yh	TD	8_D	7.35	309.69	50
a1107yh	TD	8_D	6.27	238.94	48
a1108yh	TD	8_D	4.94	288.07	40
a1109yh	TD	8_D	7.67	238.15	56
a1110yh	TD	8_D	7.04	269.8	50
a1111yh	TD	8_D	7.04	310.88	50
a1112yh	TD	8_D	5.64	246.31	42
a1113yh	TD	8_D	5.82	260.12	46
a1114yh	TD	8_D	8.28	260.08	54
a1115yh	TD	8_D	7.05	278.87	46
a1116yh	TD	8_D	6.97	259.93	54
a1117yh	TD	8_D	5.87	236.19	46
a1118yh	TD	8_D	6.39	310.14	44
a1119yh	TD	8_D	6.31	318.07	40
a1120yh	TD	8_D	6.45	245.48	50
a1121yh	TD	8_D	8.16	317.09	54
a1122yh	TD	8_D	8.49	302.08	54
a1123yh	TD	8_D	6.84	266.26	48
a1124yh	TD	8_D	6.67	253.47	52
a1125yh	TD	8_D	6.52	371.62	44
a1126yh	TD	8_D	6.54	243.31	54
a1127yh	TD	8_D	8.01	257.31	54
a1128yh	TD	8_D	6.58	306.88	50
a1129yh	TD	8_D	7.21	256.63	52
a1130yh	TD	8_D	6.38	260.45	44
a1131yh	TD	8_D	7.35	262.85	52
a1132yh	TD	8_D	4.05	195.05	32
a1133yh	TD	8_D	5.64	273.63	44
a1134yh	TD	8_D	5.34	273.43	40
a1135yh	TD	8_D	6.4	304.61	44
a1136yh	TD	8_D	5.5	309.68	56
a1137yh	TD	8_D	5.4	278.18	42
a1138yh	TD	8_D	6.96	364.54	56
a1139yh	TD	8_D	6.04	309.08	56
a1140yh	TD	8_D	6.04	308.03	42
a1141yh	TD	8_D	6.23	227.82	50
a1142yh	TD	8_D	6.4	237.7	48
a1143yh	TD	8_D	6.23	269.69	44
a1144yh	TD	8_D	5.37	303.06	38
a1145yh	TD	8_D	5.36	302.01	42
a1146yh	TD	8_D	6.18	276.83	46
a1147yh	TD	8_D	6.32	253.59	46
a1148yh	TD	8_D	5.83	191.28	52
a1149yh	TD	8_D	6.92	226.21	52
a1150yh	TD	8_D	5.41	273.3	42
a1151yh	TD	8_D	6.28	252.67	44
a1152yh	TD	8_D	7.28	280.44	48
a1153yh	TD	8_D	6.42	275.05	48
a1154yh	TD	8_D	7.14	279.88	48
a1155yh	TD	8_D	6.05	298.73	40
a1156yh	TD	8_D	7.16	250.94	50
a1157yh	TD	8_D	6.08	243.37	44
a1158yh	TD	8_D	5.97	279.06	44
a1159yh	TD	8_D	5.93	266.36	40
a1160yh	TD	8_D	6.19	254.08	46
a1161yh	TD	8_D	7.22	297.22	52
a1162yh	TD	8_D	7.47	248.58	56
a1163yh	TD	8_D	5.08	284.33	40
a1164yh	TD	8_D	6.16	233.05	46
a1165yh	TD	8_D	5.35	295.65	40
a1166yh	TD	8_D	6.71	350.34	44
a1167yh	TD	8_D	5.94	293.77	44
a1168yh	TD	8_D	6.7	239.81	50
a1169yh	TD	8_D	6.2	269.91	48
a1170yh	TD	8_D	6.55	292.24	40
a1171yh	TD	8_D	6.43	288.83	46
a1172yh	TD	8_D	7.2	245.68	50
a1173yh	TD	8_D	6.99	287.55	50
a1174yh	TD	8_D	5.33	249.5	40
a1175yh	TD	8_D	4.88	290.87	40
a1176yh	TD	8_D	6.98	346.28	56
a1177yh	TD	8_D	5.6	290.06	42
a1178yh	TD	8_D	5.83	277.17	42
a1179yh	TD	8_D	6.59	243.53	46
a1180yh	TD	8_D	4.92	217.55	38
a1181yh	TD	8_D	6.92	291.03	48
a1182yh	TD	8_D	5.24	288.09	42
a1183yh	TD	8_D	6.43	290.86	46
a1184yh	TD	8_D	6.78	242.92	54
a1185yh	TD	8_D	7.17	246.5	50
a1186yh	TD	8_D	6.56	285.06	44
a1187yh	TD	8_D	5.66	261.34	44
a1188yh	TD	8_D	5.29	283.86	40
a1189yh	TD	8_D	4.94	286.21	40
a1190yh	TD	8_D	6.92	258.14	48
a1191yh	TD	8_D	5.75	270.51	38
a1192yh	TD	8_D	6.18	244.74	48
a1193yh	TD	8_D	6.54	241.46	48
a1194yh	TD	8_D	5.73	282.37	40
a1195yh	TD	8_D	6.33	281.45	46
a1196yh	TD	8_D	6.51	243.65	50
a1197yh	TD	8_D	5.78	280.67	42
a1198yh	TD	8_D	5.49	285.56	38
a1199yh	TD	8_D	6.38	213.19	50
a1200yh	TD	8_D	5.99	223.79	50
a1201yh	TD	8_D	6.19	278.65	44
a1202yh	TD	8_D	6.53	275.26	46
a1203yh	TD	8_D	5.8	223.01	44
a1204yh	TD	8_D	6.32	277.31	46
a1205yh	TD	8_D	7.6	238.1	56
a1206yh	TD	8_D	5.73	272	44
a1207yh	TD	8_D	5.49	277.63	42
a1208yh	TD	8_D	5.67	239.29	44
a1209yh	TD	8_D	7.05	277.27	52
a1210yh	TD	8_D	5.55	233.6	44
a1211yh	TD	8_D	6.42	282.6	50
a1212yh	TD	8_D	5.87	264.07	46
a1213yh	TD	8_D	5.37	252.12	42
a1214yh	TD	8_D	6.93	268.35	50
a1215yh	TD	8_D	6.25	275.49	48
a1216yh	TD	8_D	5.59	227.09	44
a1217yh	TD	8_D	7.39	234.24	54
a1218yh	TD	8_D	6.31	325.44	44
a1219yh	TD	8_D	7.46	233.84	54
a1220yh	TD	8_D	5.64	248.19	42
a1221yh	TD	8_D	5.92	234.83	42
a1222yh	TD	8_D	6.89	224.85	52
a1223yh	TD	8_D	5.91	261.2	46
a1224yh	TD	8_D	4.76	227.13	42
a1225yh	TD	8_D	6.21	259.88	48
a1226yh	TD	8_D	5.82	263.05	42
a1227yh	TD	8_D	7.61	231.44	56
a1228yh	TD	8_D	5.82	202.81	50
a1229yh	TD	8_D	5.78	261.71	42
a1230yh	TD	8_D	7	269.54	48
a1231yh	TD	8_D	5.89	268.96	46
a1232yh	TD	8_D	6.13	248.73	48
a1233yh	TD	8_D	6.95	256.02	50
a1234yh	TD	8_D	6.3	230.4	48
a1235yh	TD	8_D	6.18	265.19	46
a1236yh	TD	8_D	5.8	253.15	46
a1237yh	TD	8_D	6.91	266.98	50
a1238yh	TD	8_D	5.96	200.84	48
a1239yh	TD	8_D	6.09	266.73	46
a1240yh	TD	8_D	5.12	257.78	38
a1241yh	TD	8_D	5.99	266.24	40
a1242yh	TD	8_D	4.99	241.42	40
a1243yh	TD	8_D	5.73	210.35	44
a1244yh	TD	8_D	4.99	169.93	44
a1245yh	TD	8_D	5.56	221.15	44
a1246yh	TD	8_D	6.47	249.11	48
a1247yh	TD	8_D	6.43	244.37	48
a1248yh	TD	8_D	5.58	254.55	42
a1249yh	TD	8_D	5.2	238.52	42
a1250yh	TD	8_D	5.93	238.19	44
a1251yh	TD	8_D	6.57	197.06	52
a1252yh	TD	8_D	5.15	216.67	38
a1253yh	TD	8_D	5.37	259.01	44
a1254yh	TD	8_D	7.3	309.92	48
a1255yh	TD	8_D	7.2	167.98	70
a1256yh	TD	8_D	6.07	258.08	48
a1257yh	TD	8_D	4.17	167.81	38
a1258yh	TD	8_D	5.37	215.57	44
a1259yh	TD	8_D	4.89	256.47	42
a1260yh	TD	8_D	5.07	235.66	42
a1261yh	TD	8_D	6.11	195.03	50
a1262yh	TD	8_D	4.85	235.28	42
a1263yh	TD	8_D	6.04	234.86	46
a1264yh	TD	8_D	4.73	212.75	40
a1265yh	TD	8_D	5.49	212.7	48
a1266yh	TD	8_D	6.3	240.99	48
a1267yh	TD	8_D	6.79	222.17	50
a1268yh	TD	8_D	8.5	265.87	54
a1269yh	TD	8_D	6.2	254.19	46
a1270yh	TD	8_D	5.83	236.05	42
a1271yh	TD	8_D	8.18	237.85	450
a1272yh	TD	8_D	4.38	229.62	38
a1273yh	TD	8_D	6.8	217.8	48
a1274yh	TD	8_D	7.36	298.43	62
a1275yh	TD	8_D	6.31	263.19	52
a1276yh	TD	8_D	7.17	234.48	52
a1277yh	TD	8_D	5.53	234.43	44
a1278yh	TD	8_D	6.16	246.49	46
a1279yh	TD	8_D	6.29	245.98	48
a1280yh	TD	8_D	4.02	245.76	40
a1281yh	TD	8_D	6.69	199.05	56
a1282yh	TD	8_D	7.79	217.19	56
a1283yh	TD	8_D	5.73	160.25	50
a1284yh	TD	8_D	5.4	243.19	42
a1285yh	TD	8_D	7.08	250.04	56
a1286yh	TD	8_D	4.97	230.57	36
a1287yh	TD	8_D	6.31	226.18	48
a1288yh	TD	8_D	4.44	240.37	38
a1289yh	TD	8_D	5.93	226.15	50
a1290yh	TD	8_D	7.05	225.19	52
a1291yh	TD	8_D	4.31	220.74	38
a1292yh	TD	8_D	5.38	227.29	42
a1293yh	TD	8_D	5.98	202.62	48
a1294yh	TD	8_D	5.85	182.57	52
a1295yh	TD	8_D	6.2	194.27	52
a1296yh	TD	8_D	4.73	220.22	38
a1297yh	TD	8_D	6.44	156.1	56
a1298yh	TD	8_D	5.93	235.56	50
a1299yh	TD	8_D	5.73	238.26	46
a1300yh	TD	8_D	4.56	234.04	40
a1301yh	TD	8_D	6.44	220.57	50
a1302yh	TD	8_D	4.96	220.55	42
a1303yh	TD	8_D	5.77	220.65	44
a1304yh	TD	8_D	6.61	202.75	54
a1305yh	TD	8_D	5.45	151.73	54
a1306yh	TD	8_D	4.92	215.4	38
a1307yh	TD	8_D	4.53	235.31	38
a1308yh	TD	8_D	5.51	230.75	42
a1309yh	TD	8_D	5.38	244.37	38
a1310yh	TD	8_D	6.49	203.65	54
a1311yh	TD	8_D	4.09	205.12	38
a1312yh	TD	8_D	6.05	265.25	46
a1313yh	TD	8_D	4.55	231.92	38
a1314yh	TD	8_D	4.89	204.45	44
a1315yh	TD	8_D	5.31	208.03	44
a1316yh	TD	8_D	4.53	193.8	36
a1317yh	TD	8_D	5.8	208.61	54
a1318yh	TD	8_D	5.45	239.75	40
a1319yh	TD	8_D	5.2	143.61	48
a1320yh	TD	8_D	6.84	196.32	50
a1321yh	TD	8_D	5.77	211.38	44
a1322yh	TD	8_D	5.7	251.12	44
a1323yh	TD	8_D	4.93	221.05	46
a1324yh	TD	8_D	5.81	192.41	78
a1325yh	TD	8_D	3.46	202.38	38
a1326yh	TD	8_D	4.76	195.69	40
a1327yh	TD	8_D	7.04	212.97	54
a1328yh	TD	8_D	3.96	195.49	34
a1329yh	TD	8_D	5.14	180.19	46
a1330yh	TD	8_D	5.17	188.5	44
a1631yh	TD	12_D	14.49	668.38	80
a1632yh	TD	12_D	13.96	558.2	68
a1633yh	TD	12_D	10.63	476.71	50
a1634yh	TD	12_D	12.41	532.64	66
a1635yh	TD	12_D	11.7	460.29	52
a1636yh	TD	12_D	12.02	523.69	64
a1637yh	TD	12_D	12.46	380.59	60
a1638yh	TD	12_D	11.33	443.22	54
a1639yh	TD	12_D	10.73	413.54	54
a1640yh	TD	12_D	11.53	506.87	62
a1641yh	TD	12_D	10.31	414.16	54
a1642yh	TD	12_D	10.51	441.51	52
a1643yh	TD	12_D	9.11	434.75	46
a1644yh	TD	12_D	11.65	405.91	168
a1645yh	TD	12_D	12.81	491.21	78
a1646yh	TD	12_D	9.47	361.29	54
a1647yh	TD	12_D	12.1	359.52	72
a1648yh	TD	12_D	9.72	429.36	48
a1649yh	TD	12_D	11.36	403	54
a1650yh	TD	12_D	12.3	436.87	60
a1651yh	TD	12_D	10.95	467.6	62
a1652yh	TD	12_D	11.12	427.58	54
a1653yh	TD	12_D	11.74	285.64	70
a1654yh	TD	12_D	12.24	557.33	74
a1655yh	TD	12_D	10.47	392.97	54
a1656yh	TD	12_D	10.28	392.82	54
a1657yh	TD	12_D	10.45	283.93	62
a1658yh	TD	12_D	9.87	472.75	64
a1659yh	TD	12_D	9.95	455.8	50
a1660yh	TD	12_D	11.23	469.11	52
a1661yh	TD	12_D	10.43	410.26	52
a1662yh	TD	12_D	10.12	409.94	52
a1663yh	TD	12_D	10.09	347.75	62
a1664yh	TD	12_D	11.86	342.66	62
a1665yh	TD	12_D	10.89	382.54	56
a1666yh	TD	12_D	10.17	384.95	54
a1667yh	TD	12_D	10.36	417.25	54
a1668yh	TD	12_D	11.21	468.19	76
a1669yh	TD	12_D	8.62	280.21	62
a1670yh	TD	12_D	11.76	379.4	56
a1671yh	TD	12_D	9.07	461.91	60
a1672yh	TD	12_D	10.22	338.47	60
a1673yh	TD	12_D	12.13	378.41	60
a1674yh	TD	12_D	11.23	378.4	58
a1675yh	TD	12_D	11.69	419.65	58
a1676yh	TD	12_D	14.13	380.68	72
a1677yh	TD	12_D	11.15	337.57	58
a1678yh	TD	12_D	10.27	337.31	56
a1679yh	TD	12_D	9.64	339.68	166
a1680yh	TD	12_D	11.05	404.19	54
a1681yh	TD	12_D	12.03	439.73	56
a1682yh	TD	12_D	10.43	396.71	52
a1683yh	TD	12_D	7.59	372.46	94
a1684yh	TD	12_D	9.2	473.24	42
a1685yh	TD	12_D	9.95	375.7	54
a1686yh	TD	12_D	9.95	395.52	52
a1687yh	TD	12_D	10.5	268.98	66
a1688yh	TD	12_D	9.24	374.87	56
a1689yh	TD	12_D	9.06	369	52
a1690yh	TD	12_D	11.58	326.08	62
a1691yh	TD	12_D	11.37	399.55	62
a1692yh	TD	12_D	11.05	362.59	58
a1693yh	TD	12_D	9.63	390.69	54
a1694yh	TD	12_D	11.09	361.36	60
a1695yh	TD	12_D	10.67	265.68	66
a1696yh	TD	12_D	10.24	438.81	52
a1697yh	TD	12_D	10.59	332.69	58
a1698yh	TD	12_D	11.39	320.85	64
a1699yh	TD	12_D	10.2	326.48	62
a1700yh	TD	12_D	10.09	398.89	52
a1701yh	TD	12_D	11.58	336.59	64
a1702yh	TD	12_D	9.06	456.55	44
a1703yh	TD	12_D	10.81	330.44	60
a1704yh	TD	12_D	11.98	361.28	68
a1705yh	TD	12_D	10.82	397.49	56
a1706yh	TD	12_D	10.81	330.11	60
a1707yh	TD	12_D	10.77	329.98	62
a1708yh	TD	12_D	10.36	396.79	54
a1709yh	TD	12_D	10.75	418.04	54
a1710yh	TD	12_D	11.26	329.12	66
a1711yh	TD	12_D	9.59	359.52	54
a1712yh	TD	12_D	11.4	328.76	62
a1713yh	TD	12_D	10.67	328.55	58
a1714yh	TD	12_D	10.04	359.02	56
a1715yh	TD	12_D	10.88	393.57	54
a1716yh	TD	12_D	10.4	355.98	56
a1717yh	TD	12_D	8.86	380.25	50
a1718yh	TD	12_D	11.08	326.8	60
a1719yh	TD	12_D	10.47	258.82	66
a1720yh	TD	12_D	9.34	378.93	50
a1721yh	TD	12_D	9.55	425.27	64
a1722yh	TD	12_D	9.89	354.37	54
a1723yh	TD	12_D	9.4	355.11	52
a1724yh	TD	12_D	10.75	387.2	60
a1725yh	TD	12_D	10.19	318.24	60
a1726yh	TD	12_D	12.49	443.2	56
a1727yh	TD	12_D	9.57	421.1	50
a1728yh	TD	12_D	10.52	347.19	56
a1729yh	TD	12_D	10.55	309.5	60
a1730yh	TD	12_D	10.4	358.82	54
a1731yh	TD	12_D	10.04	419.2	52
a1732yh	TD	12_D	11.31	358.4	58
a1733yh	TD	12_D	9.32	351.34	50
a1734yh	TD	12_D	11.53	448.49	56
a1735yh	TD	12_D	10.86	420.52	56
a1736yh	TD	12_D	9.09	325.67	54
a1737yh	TD	12_D	11.57	321.43	60
a1738yh	TD	12_D	10.9	368.2	58
a1739yh	TD	12_D	10.57	306.48	62
a1740yh	TD	12_D	9.33	369.92	52
a1741yh	TD	12_D	11.24	488.54	50
a1742yh	TD	12_D	9.75	355.03	56
a1743yh	TD	12_D	9.15	344.75	50
a1744yh	TD	12_D	9.34	367.86	52
a1745yh	TD	12_D	8.99	367.49	52
a1746yh	TD	12_D	10.66	364.93	56
a1747yh	TD	12_D	10.87	411.2	56
a1748yh	TD	12_D	11.02	484.23	78
a1749yh	TD	12_D	10.02	363.42	54
a1750yh	TD	12_D	9.14	411.88	48
a1751yh	TD	12_D	10.26	428.18	50
a1752yh	TD	12_D	8.53	364.17	50
a1753yh	TD	12_D	11.38	338.2	60
a1754yh	TD	12_D	9.87	375.59	56
a1755yh	TD	12_D	10.9	337.19	58
a1756yh	TD	12_D	9.55	406.64	50
a1757yh	TD	12_D	11.06	314.69	64
a1758yh	TD	12_D	9.03	350.08	54
a1759yh	TD	12_D	10.96	376.8	56
a1760yh	TD	12_D	9.72	376.17	52
a1761yh	TD	12_D	9.73	359.1	54
a1762yh	TD	12_D	9.36	404.37	46
a1763yh	TD	12_D	9	337.33	50
a1764yh	TD	12_D	9.15	336.62	52
a1765yh	TD	12_D	10.32	312.72	58
a1766yh	TD	12_D	10.22	340.57	58
a1767yh	TD	12_D	10.08	334.4	56
a1768yh	TD	12_D	10.74	474.97	50
a1769yh	TD	12_D	9.16	389.53	50
a1770yh	TD	12_D	9.5	356.92	54
a1771yh	TD	12_D	9.87	314.28	60
a1772yh	TD	12_D	9.51	401.17	62
a1773yh	TD	12_D	10.08	418.76	50
a1774yh	TD	12_D	9.56	313.71	58
a1775yh	TD	12_D	11.27	311.03	66
a1776yh	TD	12_D	10.47	357.66	56
a1777yh	TD	12_D	10.64	471.46	48
a1778yh	TD	12_D	8.62	337.45	48
a1779yh	TD	12_D	10.73	294.41	64
a1780yh	TD	12_D	9.45	330.58	54
a1781yh	TD	12_D	10.03	414.49	52
a1782yh	TD	12_D	10.42	300.42	66
a1783yh	TD	12_D	10.38	354.76	54
a1784yh	TD	12_D	7.59	398.53	58
a1785yh	TD	12_D	8.79	335.58	52
a1786yh	TD	12_D	10.05	308.41	58
a1787yh	TD	12_D	10.85	465.81	64
a1788yh	TD	12_D	10.39	396.27	56
a1789yh	TD	12_D	8.82	392.52	54
a1790yh	TD	12_D	10.13	305.45	60
a1791yh	TD	12_D	9.97	414.12	52
a1792yh	TD	12_D	9.56	390.26	52
a1793yh	TD	12_D	9.36	331.27	56
a1794yh	TD	12_D	12.45	304.65	70
a1795yh	TD	12_D	7.5	339.29	58
a1796yh	TD	12_D	9.94	324.2	56
a1797yh	TD	12_D	9.64	303.45	58
a1798yh	TD	12_D	12.95	303.12	68
a1799yh	TD	12_D	10.18	402.8	54
a1800yh	TD	12_D	8.78	237.8	64
a1801yh	TD	12_D	8.32	374.06	46
a1802yh	TD	12_D	9.02	402.13	48
a1803yh	TD	12_D	9.85	285.68	62
a1804yh	TD	12_D	10.2	301.7	56
a1805yh	TD	12_D	9.75	335.96	56
a1806yh	TD	12_D	7.97	327.19	48
a1807yh	TD	12_D	9.98	451.97	62
a1808yh	TD	12_D	11.26	325.85	60
a1809yh	TD	12_D	10.57	368.04	56
a1810yh	TD	12_D	9.42	318.21	54
a1811yh	TD	12_D	11.09	234.35	70
a1812yh	TD	12_D	10.09	400.53	54
a1813yh	TD	12_D	8.49	340.59	52
a1814yh	TD	12_D	9.94	356.29	54
a1815yh	TD	12_D	8.78	317.64	52
a1816yh	TD	12_D	9.85	332.89	58
a1817yh	TD	12_D	11.66	367.05	58
a1818yh	TD	12_D	9.41	288.81	60
a1819yh	TD	12_D	10.68	447.52	60
a1820yh	TD	12_D	11.5	447.25	52
a1821yh	TD	12_D	9.44	378.37	52
a1822yh	TD	12_D	9.49	355.2	54
a1823yh	TD	12_D	10.46	297.45	64
a1824yh	TD	12_D	8.25	338.49	48
a1825yh	TD	12_D	10.18	337.67	56
a1826yh	TD	12_D	8.53	377.56	46
a1827yh	TD	12_D	9.73	314.45	54
a1828yh	TD	12_D	10.13	314.31	56
a1829yh	TD	12_D	10.45	296.54	66
a1830yh	TD	12_D	8.79	388.88	48
a1831yh	TD	12_D	10.8	296.35	64
a1832yh	TD	12_D	11.64	352.39	68
a1833yh	TD	12_D	9.78	295.87	60
a1834yh	TD	12_D	9.13	329.11	54
a1835yh	TD	12_D	9.08	387.42	48
a1836yh	TD	12_D	10.57	442.15	54
a1837yh	TD	12_D	9.8	334.2	56
a1838yh	TD	12_D	9.61	312.17	66
a1839yh	TD	12_D	9.25	334.24	52
a1840yh	TD	12_D	10.79	229.76	74
a1841yh	TD	12_D	9.68	310.26	56
a1842yh	TD	12_D	10.15	370.63	56
a1843yh	TD	12_D	10.25	282.39	62
a1844yh	TD	12_D	10.11	308.53	60
a1845yh	TD	12_D	9.22	434.7	48
a1846yh	TD	12_D	9.92	379.62	52
a1847yh	TD	12_D	8.98	314.87	54
a1848yh	TD	12_D	9.07	346.59	56
a1849yh	TD	12_D	11.05	290.39	60
a1850yh	TD	12_D	10.66	328.38	58
a1851yh	TD	12_D	9.47	351.95	52
a1852yh	TD	12_D	9.88	289.06	58
a1853yh	TD	12_D	9.21	303.82	54
a1854yh	TD	12_D	8.84	342.75	52
a1855yh	TD	12_D	8.71	302.94	54
a1856yh	TD	12_D	9.24	287.03	56
a1857yh	TD	12_D	9.85	286.87	62
a1858yh	TD	12_D	9.66	268.61	60
a1859yh	TD	12_D	8.26	320.64	62
a1860yh	TD	12_D	10.45	375.91	58
a1861yh	TD	12_D	10.09	268.16	60
a1862yh	TD	12_D	8.24	371.62	48
a1863yh	TD	12_D	8.79	318.63	56
a1864yh	TD	12_D	8.93	283.89	56
a1865yh	TD	12_D	9.95	265.54	60
a1866yh	TD	12_D	10.54	221.23	74
a1867yh	TD	12_D	9.09	339.16	52
a1868yh	TD	12_D	9.92	358.12	58
a1869yh	TD	12_D	13.18	264.41	76
a1870yh	TD	12_D	9.75	264.16	60
a1871yh	TD	12_D	9.09	338.42	60
a1872yh	TD	12_D	9.59	354.9	60
a1873yh	TD	12_D	8.41	354.68	50
a1874yh	TD	12_D	8.22	318.77	48
a1875yh	TD	12_D	9.52	315.56	56
a1876yh	TD	12_D	8.28	337.18	54
a1877yh	TD	12_D	8.73	362.83	50
a1878yh	TD	12_D	10.46	296.4	62
a1879yh	TD	12_D	9.44	280.96	60
a1880yh	TD	12_D	13.41	364.32	66
a1881yh	TD	12_D	9.63	360.77	54
a1882yh	TD	12_D	9.9	362.98	56
a1883yh	TD	12_D	9.54	315.4	54
a1884yh	TD	12_D	7.76	269.17	56
a1885yh	TD	12_D	10.9	334.87	64
a1886yh	TD	12_D	5.99	336.84	56
a1887yh	TD	12_D	8.6	336.7	56
a1888yh	TD	12_D	8.13	357.82	46
a1889yh	TD	12_D	8.9	259.66	58
a1890yh	TD	12_D	9.73	311.94	58
a1891yh	TD	12_D	9.13	256.76	60
a1892yh	TD	12_D	7.97	275.23	52
a1893yh	TD	12_D	9.15	256.62	58
a1894yh	TD	12_D	11.2	289.19	70
a1895yh	TD	12_D	9	287.51	54
a1896yh	TD	12_D	10.65	352.93	58
a1897yh	TD	12_D	9.75	307.54	56
a1898yh	TD	12_D	10.2	270.77	62
a1899yh	TD	12_D	9.57	400.29	50
a1900yh	TD	12_D	11.19	305.6	66
a1901yh	TD	12_D	9.78	400.04	50
a1902yh	TD	12_D	8.14	337.06	54
a1903yh	TD	12_D	8.05	260.27	64
a1904yh	TD	12_D	10.07	272.48	60
a1905yh	TD	12_D	10.39	259.32	66
a1906yh	TD	12_D	10.26	337.9	60
a1907yh	TD	12_D	9.12	292.68	58
a1908yh	TD	12_D	9.56	336.64	54
a1909yh	TD	12_D	9.63	258.04	60
a1910yh	TD	12_D	8.3	339.6	50
a1911yh	TD	12_D	8.6	267.45	58
a1912yh	TD	12_D	10.75	394.7	52
a1913yh	TD	12_D	6.32	291	46
a1914yh	TD	12_D	9.78	339.61	54
a1915yh	TD	12_D	9.89	280.55	60
a1916yh	TD	12_D	11.28	299.6	74
a1917yh	TD	12_D	9.83	207.52	68
a1918yh	TD	12_D	9.87	337.36	58
a1919yh	TD	12_D	10.77	288.85	66
a1920yh	TD	12_D	10.51	278.75	66
a1921yh	TD	12_D	7.94	316.26	50
a1922yh	TD	12_D	9.47	267.31	58
a1923yh	TD	12_D	8.34	295.84	54
a1924yh	TD	12_D	8.04	332.73	46
a1925yh	TD	12_D	7.9	292.59	54
a1926yh	TD	12_D	9.33	295.6	58
a1927yh	TD	12_D	10.61	271.42	66
a1928yh	TD	12_D	10.35	239.33	66
a1929yh	TD	12_D	8	306.45	52
a1930yh	TD	12_D	9.81	290.55	58
a1931yh	TD	12_D	10.07	314.9	60
a1932yh	TD	12_D	9.57	316.69	54
a1933yh	TD	12_D	6.17	282.71	42
a1934yh	TD	12_D	8.75	311.68	52
a1935yh	TD	12_D	10.38	232.95	68
a1936yh	TD	12_D	9.48	309.04	56
a1937yh	TD	12_D	8.77	300.38	56
a1938yh	TD	12_D	6.69	309.08	46
a1939yh	TD	12_D	9.94	364.67	54
a1940yh	TD	12_D	8	248.48	54
a1941yh	TD	12_D	9.72	284.11	60
a1942yh	TD	12_D	8.83	291.97	54
a1943yh	TD	12_D	8.93	303.54	54
a1944yh	TD	12_D	10.06	237.83	66
a1945yh	TD	12_D	7.49	296.53	52
a1946yh	TD	12_D	8.09	302.67	52
a1947yh	TD	12_D	9.18	288.95	58
a1948yh	TD	12_D	8.71	226.14	60
a1949yh	TD	12_D	9.08	236.13	64
a1950yh	TD	12_D	11.39	299.4	68
a1951yh	TD	12_D	8.32	302.1	54
a1952yh	TD	12_D	10.25	267.05	70
a1953yh	TD	12_D	10.32	234.59	66
a1954yh	TD	12_D	9.62	273.84	58
a1955yh	TD	12_D	9.27	296.82	56
a1956yh	TD	12_D	9.49	242.42	72
a1957yh	TD	12_D	9.03	282.77	56
a1958yh	TD	12_D	10.07	349.66	52
a1959yh	TD	12_D	5.88	265.71	42
a1960yh	TD	12_D	11.69	291.9	80
a1961yh	TD	12_D	8.98	260.29	56
a1962yh	TD	12_D	8.82	289.88	56
a1963yh	TD	12_D	9.27	285.11	56
a1964yh	TD	12_D	8.03	258.8	54
a1965yh	TD	12_D	9.77	264.44	62
a1966yh	TD	12_D	7.57	271.01	52
a1967yh	TD	12_D	8.9	263.62	60
a1968yh	TD	12_D	8.94	284.01	64
a1969yh	TD	12_D	6.79	277.97	48
a1970yh	TD	12_D	8.84	283.15	56
a1971yh	TD	12_D	8.34	267.58	54
a1972yh	TD	12_D	7.55	266.52	52
a1973yh	TD	12_D	8.55	277.25	58
a1974yh	TD	12_D	9.6	279.32	62
a1975yh	TD	12_D	8.09	262.79	54
a1976yh	TD	12_D	7.06	249.15	52
a1977yh	TD	12_D	5.94	248.71	46
a1978yh	TD	12_D	9.88	269.37	72
a1979yh	TD	12_D	9.28	248.34	60
a1980yh	TD	12_D	6.87	252.72	50
a1981yh	TD	12_D	8.69	224.05	64
a1982yh	TD	12_D	5.65	247.56	44
a1983yh	TD	12_D	10.46	242.84	66
a1984yh	TD	12_D	6.05	193.86	70
a5hcy	ASD	4_D	3.13	695.7	78
a10yh	ASD	4_D	3.97	719.27	130
a11yh	ASD	4_D	4.96	424.75	74
a12yh	ASD	4_D	15.22	388.03	80
a13yh	ASD	4_D	8.31	358.65	76
a14yh	ASD	4_D	5.98	273.58	46
a15yh	ASD	4_D	4.35	282.8	50
a16yh	ASD	4_D	3.5	312.48	52
a17yh	ASD	4_D	5.62	252.43	44
a18yh	ASD	4_D	4.37	233.47	42
a19yh	ASD	4_D	3.68	242.04	50
a20yh	ASD	4_D	4.47	243.16	38
a21yh	ASD	4_D	3.46	241.45	34
a22yh	ASD	4_D	4.62	278.71	52
a23yh	ASD	4_D	3.97	214.27	36
a24yh	ASD	4_D	4.32	235.49	40
a25yh	ASD	4_D	3.95	231.58	38
a26yh	ASD	4_D	4.47	274.1	40
a27yh	ASD	4_D	4.01	242.49	38
a28yh	ASD	4_D	3.94	265.66	54
a29yh	ASD	4_D	4.38	272.24	54
a30yh	ASD	4_D	4.21	207.05	38
a31yh	ASD	4_D	4.44	226.57	38
a32yh	ASD	4_D	4.51	201.31	46
a33yh	ASD	4_D	3.64	184.99	38
a34yh	ASD	4_D	3.56	222.96	48
a35yh	ASD	4_D	3.62	221.43	38
a36yh	ASD	4_D	4.12	200.74	40
a37yh	ASD	4_D	3.58	219.76	38
a38yh	ASD	4_D	3.73	219.73	36
a39yh	ASD	4_D	4.49	219.52	40
a40yh	ASD	4_D	3.97	194.59	38
a41yh	ASD	4_D	3.68	213.93	36
a42yh	ASD	4_D	5.13	199.3	44
a43yh	ASD	4_D	4.24	249.95	38
a44yh	ASD	4_D	3.82	216.68	38
a45yh	ASD	4_D	4.61	203.14	42
a46yh	ASD	4_D	3.42	256.07	52
a47yh	ASD	4_D	3.84	255.95	52
a48yh	ASD	4_D	4.25	214.84	38
a49yh	ASD	4_D	3.55	211.4	38
a50yh	ASD	4_D	3.62	215.27	38
a51yh	ASD	4_D	3.7	214.61	36
a52yh	ASD	4_D	3.7	193.12	36
a53yh	ASD	4_D	4.31	252.74	38
a54yh	ASD	4_D	3.91	188.59	36
a55yh	ASD	4_D	3.64	211.77	38
a56yh	ASD	4_D	3.3	222.04	38
a57yh	ASD	4_D	4.37	194.92	38
a58yh	ASD	4_D	3.36	167.19	36
a59yh	ASD	4_D	3.35	203.73	38
a60yh	ASD	4_D	3.17	203.16	36
a61yh	ASD	4_D	3.69	203.13	36
a62yh	ASD	4_D	3.18	206.37	36
a63yh	ASD	4_D	3.71	182.64	34
a64yh	ASD	4_D	3.36	163.56	34
a65yh	ASD	4_D	3.96	204.54	36
a66yh	ASD	4_D	3.49	162.87	34
a67yh	ASD	4_D	3.85	213.77	38
a68yh	ASD	4_D	3.8	204.64	38
a69yh	ASD	4_D	3.63	180.94	32
a70yh	ASD	4_D	3.8	189.33	34
a71yh	ASD	4_D	3.15	198.46	38
a72yh	ASD	4_D	3.63	203.18	36
a73yh	ASD	4_D	4.02	202.98	36
a74yh	ASD	4_D	3.86	202.81	38
a75yh	ASD	4_D	3.37	179.44	32
a76yh	ASD	4_D	4.02	202.41	38
a77yh	ASD	4_D	3.59	210.48	36
a78yh	ASD	4_D	3.68	186.57	36
a79yh	ASD	4_D	4.54	229.02	42
a80yh	ASD	4_D	4.03	200.74	40
a81yh	ASD	4_D	3.2	184.86	34
a82yh	ASD	4_D	3.74	199.28	36
a83yh	ASD	4_D	4.37	234.94	40
a84yh	ASD	4_D	4.09	171.18	38
a85yh	ASD	4_D	3.43	198.1	36
a86yh	ASD	4_D	3.22	197.63	36
a87yh	ASD	4_D	3.87	170.25	34
a88yh	ASD	4_D	3.16	181.27	34
a89yh	ASD	4_D	3.68	204.55	32
a90yh	ASD	4_D	3.29	231.43	52
a91yh	ASD	4_D	3.39	173.97	32
a92yh	ASD	4_D	3.56	152.74	38
a93yh	ASD	4_D	3.65	184.19	34
a94yh	ASD	4_D	3.52	152.13	36
a95yh	ASD	4_D	3.87	229.92	38
a96yh	ASD	4_D	3.12	172.9	34
a97yh	ASD	4_D	3.37	172.47	32
a98yh	ASD	4_D	3.41	172.09	32
a99yh	ASD	4_D	4.56	167.54	44
a100yh	ASD	4_D	3.27	150.36	32
a101yh	ASD	4_D	3.67	218.56	36
a102yh	ASD	4_D	3.56	187.69	36
a103yh	ASD	4_D	3.38	182.14	32
a104yh	ASD	4_D	3.58	200	34
a105yh	ASD	4_D	3.62	199.89	36
a106yh	ASD	4_D	3.08	187.15	34
a107yh	ASD	4_D	3.59	165.58	34
a108yh	ASD	4_D	3.2	147.23	36
a109yh	ASD	4_D	3.94	181.03	38
a110yh	ASD	4_D	3.6	170.9	36
a111yh	ASD	4_D	3.24	197.96	36
a112yh	ASD	4_D	3.16	168.54	32
a113yh	ASD	4_D	3.04	145.87	32
a114yh	ASD	4_D	3.87	222.08	40
a115yh	ASD	4_D	3.39	162.65	34
a116yh	ASD	4_D	3.39	166.95	32
a117yh	ASD	4_D	3.08	183.53	36
a118yh	ASD	4_D	3.27	143.47	32
a119yh	ASD	4_D	3.99	172.16	38
a120yh	ASD	4_D	2.78	187.9	32
a121yh	ASD	4_D	2.79	142.58	32
a122yh	ASD	4_D	2.95	142.33	32
a123yh	ASD	4_D	3.05	193.16	34
a124yh	ASD	4_D	3.62	192.61	38
a125yh	ASD	4_D	3.12	163.31	32
a126yh	ASD	4_D	3.26	178.68	38
a127yh	ASD	4_D	3.79	176.81	34
a128yh	ASD	4_D	3.4	180	34
a129yh	ASD	4_D	3.8	159.38	40
a130yh	ASD	4_D	3.35	185.68	34
a131yh	ASD	4_D	3.61	165.93	36
a132yh	ASD	4_D	3.14	184.25	36
a133yh	ASD	4_D	3.87	206.83	36
a134yh	ASD	4_D	3.72	138.8	38
a135yh	ASD	4_D	3.05	162.42	34
a136yh	ASD	4_D	3.75	158.12	38
a137yh	ASD	4_D	5.08	164.52	50
a138yh	ASD	4_D	3.36	165.57	34
a139yh	ASD	4_D	4	213.33	38
a140yh	ASD	4_D	3.27	163.34	30
a141yh	ASD	4_D	3.46	202.88	38
a142yh	ASD	4_D	3.34	158.2	32
a143yh	ASD	4_D	3.71	155.42	36
a144yh	ASD	4_D	3.53	164.05	32
a145yh	ASD	4_D	3.48	172.84	38
a146yh	ASD	4_D	3.29	186.59	40
a147yh	ASD	4_D	4.02	172.38	42
a148yh	ASD	4_D	2.55	133.95	30
a149yh	ASD	4_D	3.52	173.17	32
a150yh	ASD	4_D	2.61	133.72	28
a151yh	ASD	4_D	3.33	154.49	34
a152yh	ASD	4_D	3.02	156.83	34
a153yh	ASD	4_D	3.46	178.97	36
a154yh	ASD	4_D	2.97	161.14	32
a155yh	ASD	4_D	3.26	172.27	32
a156yh	ASD	4_D	3.38	179.53	36
a157yh	ASD	4_D	3.4	153.53	34
a158yh	ASD	4_D	2.85	155.58	32
a159yh	ASD	4_D	2.71	131.61	30
a160yh	ASD	4_D	3.3	179.03	36
a161yh	ASD	4_D	3.36	152.84	32
a162yh	ASD	4_D	2.86	177.33	34
a163yh	ASD	4_D	4	208.2	38
a164yh	ASD	4_D	3.2	168.91	36
a165yh	ASD	4_D	3.66	152.43	34
a166yh	ASD	4_D	3.27	176.87	36
a167yh	ASD	4_D	3.21	168.85	38
a168yh	ASD	4_D	3.06	182.79	32
a169yh	ASD	4_D	3.22	153.88	34
a170yh	ASD	4_D	3.25	204.98	38
a171yh	ASD	4_D	3.06	127.92	34
a172yh	ASD	4_D	3.6	157.9	40
a173yh	ASD	4_D	2.94	150.8	32
a174yh	ASD	4_D	3.67	156.53	34
a175yh	ASD	4_D	3.24	174.58	34
a176yh	ASD	4_D	3.03	153.08	34
a177yh	ASD	4_D	3.13	156.22	36
a178yh	ASD	4_D	3.01	149.9	30
a179yh	ASD	4_D	2.73	155.52	34
a180yh	ASD	4_D	3.76	191.42	40
a181yh	ASD	4_D	3.52	172.34	36
a182yh	ASD	4_D	3.9	172.82	38
a183yh	ASD	4_D	3.01	167.42	34
a184yh	ASD	4_D	2.8	166.08	32
a185yh	ASD	4_D	3.32	147.34	36
a186yh	ASD	4_D	3.24	161.86	36
a187yh	ASD	4_D	2.88	148.17	32
a188yh	ASD	4_D	3.55	146.87	34
a189yh	ASD	4_D	3.54	161.38	36
a190yh	ASD	4_D	3.23	170.71	36
a191yh	ASD	4_D	3.36	146.32	34
a192yh	ASD	4_D	3.41	154.41	36
a193yh	ASD	4_D	2.98	198.87	50
a194yh	ASD	4_D	3.69	152.8	38
a195yh	ASD	4_D	2.87	159.56	36
a196yh	ASD	4_D	2.58	121.49	30
a197yh	ASD	4_D	3.68	149.22	40
a198yh	ASD	4_D	3.35	168.95	32
a199yh	ASD	4_D	3.48	144.32	34
a200yh	ASD	4_D	3.45	157.63	40
a201yh	ASD	4_D	3.09	157.51	36
a202yh	ASD	4_D	3.26	185.23	32
a203yh	ASD	4_D	2.86	157.06	38
a204yh	ASD	4_D	2.77	156.93	36
a205yh	ASD	4_D	3.25	151.95	34
a206yh	ASD	4_D	3.19	194.95	36
a207yh	ASD	4_D	2.93	151.61	34
a208yh	ASD	4_D	2.61	148.99	32
a209yh	ASD	4_D	2.52	143.04	32
a210yh	ASD	4_D	3.51	194.24	38
a211yh	ASD	4_D	2.78	165.7	34
a212yh	ASD	4_D	3.44	194.02	36
a213yh	ASD	4_D	3.54	142.48	36
a214yh	ASD	4_D	3.5	142.28	38
a215yh	ASD	4_D	3.38	166.15	34
a216yh	ASD	4_D	2.51	154.21	36
a217yh	ASD	4_D	3.28	166.1	36
a218yh	ASD	4_D	3.23	166.09	36
a219yh	ASD	4_D	2.71	144.58	30
a220yh	ASD	4_D	3.4	145.65	32
a221yh	ASD	4_D	3.43	190.24	38
a222yh	ASD	4_D	2.63	143.61	32
a223yh	ASD	4_D	2.86	148.03	30
a224yh	ASD	4_D	2.85	160.93	32
a225yh	ASD	4_D	2.74	161.39	32
a226yh	ASD	4_D	3.04	138.03	34
a227yh	ASD	4_D	3.93	176.61	38
a228yh	ASD	4_D	3.13	187.41	36
a229yh	ASD	4_D	2.67	142.72	34
a230yh	ASD	4_D	2.56	160.04	34
a231yh	ASD	4_D	3.25	137.61	32
a232yh	ASD	4_D	2.78	160.72	34
a233yh	ASD	4_D	2.93	148.83	34
a234yh	ASD	4_D	3.15	159.55	30
a235yh	ASD	4_D	3.27	174.96	34
a236yh	ASD	4_D	2.82	136.68	30
a237yh	ASD	4_D	2.54	135.36	28
a238yh	ASD	4_D	3.06	158.49	30
a239yh	ASD	4_D	2.78	145	32
a240yh	ASD	4_D	2.99	145	30
a241yh	ASD	4_D	3.36	135.59	36
a242yh	ASD	4_D	3.34	161.87	32
a243yh	ASD	4_D	3.09	157.69	32
a244yh	ASD	4_D	2.71	171.34	32
a245yh	ASD	4_D	2.57	137.84	28
a246yh	ASD	4_D	2.63	158.04	34
a247yh	ASD	4_D	2.91	156.6	34
a248yh	ASD	4_D	3.46	180.62	36
a249yh	ASD	4_D	3.34	156.57	40
a250yh	ASD	4_D	2.95	155.65	30
a251yh	ASD	4_D	3.5	157.37	36
a252yh	ASD	4_D	2.91	155.69	34
a253yh	ASD	4_D	3.12	178.67	34
a254yh	ASD	4_D	2.41	135.03	32
a255yh	ASD	4_D	2.86	129.32	32
a256yh	ASD	4_D	3.04	139.89	34
a257yh	ASD	4_D	2.14	101.69	28
a258yh	ASD	4_D	2.49	151.05	32
a259yh	ASD	4_D	2.05	100.76	28
a260yh	ASD	4_D	2.78	133.15	30
a261yh	ASD	4_D	3.11	153.52	30
a262yh	ASD	4_D	2.38	132.59	30
a263yh	ASD	4_D	2.75	153.33	30
a264yh	ASD	4_D	2.84	137.97	32
a265yh	ASD	4_D	2.7	148.97	32
a266yh	ASD	4_D	2.72	124.11	30
a267yh	ASD	4_D	2.87	147.84	32
a268yh	ASD	4_D	2.9	148.04	38
a269yh	ASD	4_D	2.95	156.65	34
a270yh	ASD	4_D	2.64	144.71	30
a271yh	ASD	4_D	3.7	155.12	40
a272yh	ASD	4_D	2.75	154.68	32
a273yh	ASD	4_D	2.67	148.16	28
a274yh	ASD	4_D	3.08	145.33	34
a275yh	ASD	4_D	3.63	164.59	42
a276yh	ASD	4_D	2.58	131.09	30
a277yh	ASD	4_D	2.94	141.29	34
a278yh	ASD	4_D	2.55	129.64	30
a279yh	ASD	4_D	2.37	140.07	28
a280yh	ASD	4_D	2.56	119.21	32
a281yh	ASD	4_D	2.81	138.77	30
a282yh	ASD	4_D	2.75	128.05	30
a283yh	ASD	4_D	2.68	137.17	30
a284yh	ASD	4_D	2.41	136.76	30
a285yh	ASD	4_D	2.73	143.79	30
a286yh	ASD	4_D	2.75	141.94	30
a287yh	ASD	4_D	2.87	141.86	30
a288yh	ASD	4_D	2.44	133.18	32
a289yh	ASD	4_D	2.3	129.92	32
a290yh	ASD	4_D	2.79	121.87	30
a291yh	ASD	4_D	2.2	126.77	32
a292yh	ASD	4_D	2.42	132.9	28
a293yh	ASD	4_D	2.04	118.32	30
a294yh	ASD	4_D	2.88	93.82	36
a295yh	ASD	4_D	2.18	91.12	30
a653yh	ASD	8_D	8.39	486.61	98
a654yh	ASD	8_D	4.97	498.16	108
a655yh	ASD	8_D	9.65	481.68	76
a656yh	ASD	8_D	8.39	400.95	48
a657yh	ASD	8_D	8.14	383.62	46
a658yh	ASD	8_D	8.75	462.35	60
a659yh	ASD	8_D	7.55	401.02	42
a660yh	ASD	8_D	8.31	309.36	54
a661yh	ASD	8_D	7.54	438.89	62
a662yh	ASD	8_D	8.87	360.64	48
a663yh	ASD	8_D	8.22	354.02	48
a664yh	ASD	8_D	9.17	353.15	54
a665yh	ASD	8_D	6.3	423.49	146
a666yh	ASD	8_D	7.25	376.49	56
a667yh	ASD	8_D	9.57	306.76	54
a668yh	ASD	8_D	7.54	345.95	46
a669yh	ASD	8_D	6.83	311.53	46
a670yh	ASD	8_D	8.57	369.52	50
a671yh	ASD	8_D	7.42	370.19	42
a672yh	ASD	8_D	7.11	346.13	46
a673yh	ASD	8_D	7.57	413.16	58
a674yh	ASD	8_D	6.42	285.37	42
a675yh	ASD	8_D	8	366.2	46
a676yh	ASD	8_D	8.3	335.05	50
a677yh	ASD	8_D	6.98	362.41	40
a678yh	ASD	8_D	6.75	281.55	46
a679yh	ASD	8_D	6.15	335.57	44
a680yh	ASD	8_D	7.76	293	50
a681yh	ASD	8_D	6.72	331.4	44
a682yh	ASD	8_D	9.92	398.59	52
a683yh	ASD	8_D	7.08	298.39	50
a684yh	ASD	8_D	6.74	331.76	44
a685yh	ASD	8_D	7.64	329.73	48
a686yh	ASD	8_D	7.66	329.49	46
a687yh	ASD	8_D	6.81	329.02	44
a688yh	ASD	8_D	7.19	329.08	46
a689yh	ASD	8_D	5.49	276.71	40
a690yh	ASD	8_D	8.87	327.3	54
a691yh	ASD	8_D	7.35	274.06	48
a692yh	ASD	8_D	6.62	327.59	46
a693yh	ASD	8_D	7.32	391.28	60
a694yh	ASD	8_D	7.55	273.59	50
a695yh	ASD	8_D	6.49	322.69	40
a696yh	ASD	8_D	6.92	321.51	42
a697yh	ASD	8_D	6.79	315.85	44
a698yh	ASD	8_D	7.31	314.15	46
a699yh	ASD	8_D	7.7	297.52	52
a700yh	ASD	8_D	7.3	383.27	60
a701yh	ASD	8_D	7.26	383.01	60
a702yh	ASD	8_D	9.05	316.28	56
a703yh	ASD	8_D	7.01	340.04	44
a704yh	ASD	8_D	8.94	271.75	58
a705yh	ASD	8_D	6.87	334.85	46
a706yh	ASD	8_D	7.64	379.28	60
a707yh	ASD	8_D	7.12	308.63	48
a708yh	ASD	8_D	6.21	313.46	42
a709yh	ASD	8_D	8.05	290.67	52
a710yh	ASD	8_D	7.1	281.85	48
a711yh	ASD	8_D	6.97	315.61	46
a712yh	ASD	8_D	8.69	311.68	52
a713yh	ASD	8_D	8.25	273.3	52
a714yh	ASD	8_D	7.09	284.98	50
a715yh	ASD	8_D	6.03	306.95	38
a716yh	ASD	8_D	6.62	291.41	44
a717yh	ASD	8_D	7.65	267.38	50
a718yh	ASD	8_D	7.13	266.12	48
a719yh	ASD	8_D	6.68	261.72	48
a720yh	ASD	8_D	7.31	278.47	50
a721yh	ASD	8_D	6.62	272.02	50
a722yh	ASD	8_D	8.08	264.76	50
a723yh	ASD	8_D	6.22	287.17	42
a724yh	ASD	8_D	5.53	304.28	42
a725yh	ASD	8_D	7.07	286.9	46
a726yh	ASD	8_D	7.26	257.77	50
a727yh	ASD	8_D	7.68	269.89	52
a728yh	ASD	8_D	6.53	299.29	46
a729yh	ASD	8_D	7.15	256.78	50
a730yh	ASD	8_D	7.24	258.62	52
a731yh	ASD	8_D	7.87	274.64	52
a732yh	ASD	8_D	6.79	320.78	42
a733yh	ASD	8_D	7.5	300.96	48
a734yh	ASD	8_D	6.47	319.53	42
a735yh	ASD	8_D	6.37	300.23	42
a736yh	ASD	8_D	8.01	354.68	46
a737yh	ASD	8_D	8.93	256.9	62
a738yh	ASD	8_D	6.62	272.01	48
a739yh	ASD	8_D	6.06	296.05	44
a740yh	ASD	8_D	7.85	352.82	46
a741yh	ASD	8_D	7.4	270.43	50
a742yh	ASD	8_D	6.01	265.89	42
a743yh	ASD	8_D	8.49	288.41	56
a744yh	ASD	8_D	6.65	316.58	46
a745yh	ASD	8_D	6.68	316.38	42
a746yh	ASD	8_D	6.08	253.36	40
a747yh	ASD	8_D	6.37	279.7	44
a748yh	ASD	8_D	7.24	287.66	50
a749yh	ASD	8_D	7.43	252.61	52
a750yh	ASD	8_D	8.69	253.91	56
a751yh	ASD	8_D	8.67	257.01	56
a752yh	ASD	8_D	7.26	285.11	48
a753yh	ASD	8_D	6.23	291.47	46
a754yh	ASD	8_D	7.22	351.01	44
a755yh	ASD	8_D	7.63	254.8	50
a756yh	ASD	8_D	6.88	251.64	48
a757yh	ASD	8_D	8.21	264.19	54
a758yh	ASD	8_D	6.44	283.03	46
a759yh	ASD	8_D	8.46	254.29	56
a760yh	ASD	8_D	6.78	274.07	50
a761yh	ASD	8_D	7.01	250.11	52
a762yh	ASD	8_D	6.26	262.13	46
a763yh	ASD	8_D	6.73	302.85	46
a764yh	ASD	8_D	6.79	258.68	50
a765yh	ASD	8_D	7.43	248.44	50
a766yh	ASD	8_D	6.37	258.66	48
a767yh	ASD	8_D	6.88	307.32	44
a768yh	ASD	8_D	6.53	301.12	44
a769yh	ASD	8_D	6.49	306.89	42
a770yh	ASD	8_D	6.66	340.13	44
a771yh	ASD	8_D	5.85	247.15	42
a772yh	ASD	8_D	5.6	286.52	42
a773yh	ASD	8_D	7.7	283.33	52
a774yh	ASD	8_D	6.92	303.08	52
a775yh	ASD	8_D	6.08	282.4	42
a776yh	ASD	8_D	6.7	253.43	104
a777yh	ASD	8_D	6.55	334.2	42
a778yh	ASD	8_D	6.43	294.46	46
a779yh	ASD	8_D	6.76	252.86	50
a780yh	ASD	8_D	5.61	280.59	40
a781yh	ASD	8_D	7.93	272.8	50
a782yh	ASD	8_D	5.31	282.78	44
a783yh	ASD	8_D	6.53	242.95	50
a784yh	ASD	8_D	6.43	242.85	46
a785yh	ASD	8_D	7.66	242.58	52
a786yh	ASD	8_D	7.28	330.85	46
a787yh	ASD	8_D	7	278.07	46
a788yh	ASD	8_D	7.38	332.34	48
a789yh	ASD	8_D	6.46	331.7	44
a790yh	ASD	8_D	7.62	241.7	52
a791yh	ASD	8_D	6.34	276.36	48
a792yh	ASD	8_D	6.13	247.6	46
a793yh	ASD	8_D	6.17	287.29	48
a794yh	ASD	8_D	6.3	329.89	60
a795yh	ASD	8_D	6.88	245.73	54
a796yh	ASD	8_D	5.31	246.28	40
a797yh	ASD	8_D	6.64	274.26	50
a798yh	ASD	8_D	7.3	239.56	50
a799yh	ASD	8_D	7.29	239.53	50
a800yh	ASD	8_D	7.67	239.5	52
a801yh	ASD	8_D	6.82	275.76	46
a802yh	ASD	8_D	6.72	245.48	52
a803yh	ASD	8_D	6.52	291.79	46
a804yh	ASD	8_D	6.88	284.65	48
a805yh	ASD	8_D	6.39	274.7	46
a806yh	ASD	8_D	6.13	236.87	52
a807yh	ASD	8_D	6.16	283.76	44
a808yh	ASD	8_D	7.29	238.07	52
a809yh	ASD	8_D	7.22	271.68	50
a810yh	ASD	8_D	6.65	269.74	44
a811yh	ASD	8_D	7.98	319.75	50
a812yh	ASD	8_D	7.4	235.9	52
a813yh	ASD	8_D	5.97	268.38	44
a814yh	ASD	8_D	7.56	235.4	54
a815yh	ASD	8_D	7.42	260.17	54
a816yh	ASD	8_D	6.92	234.16	52
a817yh	ASD	8_D	5.36	241.42	38
a818yh	ASD	8_D	6.08	234.03	48
a819yh	ASD	8_D	6.96	269.15	50
a820yh	ASD	8_D	6.85	286.59	50
a821yh	ASD	8_D	6.92	285.12	48
a822yh	ASD	8_D	7.45	258	52
a823yh	ASD	8_D	6.42	266.66	48
a824yh	ASD	8_D	7	266.12	48
a825yh	ASD	8_D	6.07	231.92	44
a826yh	ASD	8_D	6.36	313.37	44
a827yh	ASD	8_D	6.4	256.48	46
a828yh	ASD	8_D	5.63	312.1	42
a829yh	ASD	8_D	6.14	266.26	44
a830yh	ASD	8_D	7.29	230.29	54
a831yh	ASD	8_D	7.79	247.19	56
a832yh	ASD	8_D	5.95	281.47	42
a833yh	ASD	8_D	6.46	236.44	108
a834yh	ASD	8_D	8.67	309.59	54
a835yh	ASD	8_D	6.71	228.83	52
a836yh	ASD	8_D	6.13	278.78	50
a837yh	ASD	8_D	5.75	234.54	48
a838yh	ASD	8_D	7.31	228.4	50
a839yh	ASD	8_D	6.94	244.02	50
a840yh	ASD	8_D	6.63	243.85	48
a841yh	ASD	8_D	6.51	312.53	46
a842yh	ASD	8_D	8.39	227.63	60
a843yh	ASD	8_D	7.05	251.16	48
a844yh	ASD	8_D	6.9	229.65	52
a845yh	ASD	8_D	5.78	269.5	44
a846yh	ASD	8_D	6.32	229.17	46
a847yh	ASD	8_D	7	259.58	50
a848yh	ASD	8_D	5.9	260.98	44
a849yh	ASD	8_D	6.27	258.86	48
a850yh	ASD	8_D	6.85	248.97	48
a851yh	ASD	8_D	7.34	304.08	48
a852yh	ASD	8_D	7.23	241.31	52
a853yh	ASD	8_D	5.82	225.72	46
a854yh	ASD	8_D	6.93	309.37	48
a855yh	ASD	8_D	7.21	308.47	48
a856yh	ASD	8_D	6.4	225.56	48
a857yh	ASD	8_D	6.22	225.4	48
a858yh	ASD	8_D	5.77	239.3	44
a859yh	ASD	8_D	6.44	238.87	48
a860yh	ASD	8_D	7.09	255.47	52
a861yh	ASD	8_D	5.89	225.9	44
a862yh	ASD	8_D	7.04	245.13	50
a863yh	ASD	8_D	7.07	222.5	52
a864yh	ASD	8_D	6.65	254.68	50
a865yh	ASD	8_D	7.07	244.58	50
a866yh	ASD	8_D	6.63	254.82	48
a867yh	ASD	8_D	6.03	221.33	48
a868yh	ASD	8_D	5.95	270.15	44
a869yh	ASD	8_D	6.23	254.3	46
a870yh	ASD	8_D	6.24	268.9	42
a871yh	ASD	8_D	5.88	250.74	46
a872yh	ASD	8_D	8.68	225.8	60
a873yh	ASD	8_D	5.38	241.33	44
a874yh	ASD	8_D	5.94	299.36	58
a875yh	ASD	8_D	6.44	216.73	50
a876yh	ASD	8_D	6.71	291.95	46
a877yh	ASD	8_D	6.16	215.66	50
a878yh	ASD	8_D	6.59	254.96	48
a879yh	ASD	8_D	6.31	220.02	46
a880yh	ASD	8_D	6.1	252.93	46
a881yh	ASD	8_D	5.95	246.89	44
a882yh	ASD	8_D	5.51	288.04	40
a883yh	ASD	8_D	6.84	228.05	50
a884yh	ASD	8_D	6.06	219.51	48
a885yh	ASD	8_D	7.12	252.04	52
a886yh	ASD	8_D	5.15	246.76	40
a887yh	ASD	8_D	7.07	226.91	52
a888yh	ASD	8_D	6.55	292.32	46
a889yh	ASD	8_D	6.89	285.89	46
a890yh	ASD	8_D	6.18	210.19	48
a891yh	ASD	8_D	7.01	218.12	54
a892yh	ASD	8_D	6.24	213.93	52
a893yh	ASD	8_D	7.09	231.89	52
a894yh	ASD	8_D	5.35	213.03	42
a895yh	ASD	8_D	5.14	216.6	40
a896yh	ASD	8_D	5.85	216.18	46
a897yh	ASD	8_D	5.18	242.82	38
a898yh	ASD	8_D	7.06	229.75	54
a899yh	ASD	8_D	6.16	205.44	50
a900yh	ASD	8_D	7.04	254.84	50
a901yh	ASD	8_D	4.94	244.47	42
a902yh	ASD	8_D	4.51	240.89	38
a903yh	ASD	8_D	5.34	239.27	42
a904yh	ASD	8_D	6.83	238.55	50
a905yh	ASD	8_D	6.54	283.35	46
a906yh	ASD	8_D	6.37	282.43	48
a907yh	ASD	8_D	6.25	273.86	46
a908yh	ASD	8_D	6.53	223.24	50
a909yh	ASD	8_D	7.18	204.57	52
a910yh	ASD	8_D	5.71	231.61	46
a911yh	ASD	8_D	5.33	272.1	38
a912yh	ASD	8_D	7.42	206	60
a913yh	ASD	8_D	4.34	230.96	38
a914yh	ASD	8_D	7.24	237.11	54
a915yh	ASD	8_D	6.75	271.46	50
a916yh	ASD	8_D	5.7	233.04	44
a917yh	ASD	8_D	4.83	204.53	38
a918yh	ASD	8_D	7.36	231.65	54
a919yh	ASD	8_D	5.01	232.69	42
a920yh	ASD	8_D	6.5	209.25	50
a921yh	ASD	8_D	6.58	231.15	50
a922yh	ASD	8_D	5.7	193.72	48
a923yh	ASD	8_D	6.41	274.6	46
a924yh	ASD	8_D	5.24	231.06	44
a925yh	ASD	8_D	6.18	231.75	48
a926yh	ASD	8_D	5.37	264.93	40
a927yh	ASD	8_D	4.77	191.11	42
a928yh	ASD	8_D	5.74	230.18	46
a929yh	ASD	8_D	4.05	202.62	36
a930yh	ASD	8_D	5.88	226.98	48
a931yh	ASD	8_D	5	227.96	44
a932yh	ASD	8_D	6.59	196.54	54
a933yh	ASD	8_D	6.98	225.68	54
a934yh	ASD	8_D	6.68	206.15	56
a935yh	ASD	8_D	5.91	268.38	46
a936yh	ASD	8_D	5.71	186.72	48
a937yh	ASD	8_D	7.02	224.73	52
a938yh	ASD	8_D	6.26	219.95	48
a939yh	ASD	8_D	5.24	233.57	40
a940yh	ASD	8_D	6.79	219.23	54
a941yh	ASD	8_D	5.81	251.48	40
a942yh	ASD	8_D	6.19	259.16	52
a943yh	ASD	8_D	4.57	227.34	36
a944yh	ASD	8_D	4.64	227.3	36
a945yh	ASD	8_D	5.08	216.36	44
a946yh	ASD	8_D	5.82	199.5	46
a947yh	ASD	8_D	5.83	195.49	44
a948yh	ASD	8_D	4.86	195.36	40
a949yh	ASD	8_D	6.09	205.67	50
a950yh	ASD	8_D	6.05	188.21	54
a951yh	ASD	8_D	4.67	209.16	40
a952yh	ASD	8_D	6.08	183.16	94
a953yh	ASD	8_D	4.48	181.73	38
a954yh	ASD	8_D	6.03	230.74	46
a955yh	ASD	8_D	6.4	201.59	48
a956yh	ASD	8_D	4.55	198.08	44
a957yh	ASD	8_D	5.39	199.95	48
a958yh	ASD	8_D	4.85	174.89	46
a959yh	ASD	8_D	6.03	192.31	48
a960yh	ASD	8_D	5.22	168.49	48
a961yh	ASD	8_D	4.77	189.83	48
a962yh	ASD	8_D	5.86	179.74	48
a963yh	ASD	8_D	4.98	162.49	52
a964yh	ASD	8_D	5.84	178.1	46
a1331yh	ASD	12_D	14.76	522.48	58
a1332yh	ASD	12_D	9.96	474.36	144
a1333yh	ASD	12_D	11.39	416.35	54
a1334yh	ASD	12_D	10.57	459.67	148
a1335yh	ASD	12_D	11.97	507.06	54
a1336yh	ASD	12_D	13.31	550.3	82
a1337yh	ASD	12_D	11.87	449.13	56
a1338yh	ASD	12_D	14.24	541.46	84
a1339yh	ASD	12_D	11.6	442.35	54
a1340yh	ASD	12_D	11.06	439.71	52
a1341yh	ASD	12_D	12.52	365.28	62
a1342yh	ASD	12_D	10.2	466.27	48
a1343yh	ASD	12_D	9.84	343.48	56
a1344yh	ASD	12_D	13.13	383.29	64
a1345yh	ASD	12_D	10.91	459.02	64
a1346yh	ASD	12_D	12.14	352.15	64
a1347yh	ASD	12_D	12.65	414.58	60
a1348yh	ASD	12_D	10.75	508.01	46
a1349yh	ASD	12_D	10.12	415.92	52
a1350yh	ASD	12_D	11.77	451.07	66
a1351yh	ASD	12_D	11.41	402.78	54
a1352yh	ASD	12_D	12.23	447.94	68
a1353yh	ASD	12_D	11.06	496.75	64
a1354yh	ASD	12_D	10.7	445.45	74
a1355yh	ASD	12_D	10.58	404.83	52
a1356yh	ASD	12_D	10.71	444.09	62
a1357yh	ASD	12_D	10.38	441.11	46
a1358yh	ASD	12_D	9.4	330.15	52
a1359yh	ASD	12_D	9.59	440.19	48
a1360yh	ASD	12_D	10.34	329.54	54
a1361yh	ASD	12_D	10.26	404.28	54
a1362yh	ASD	12_D	11.1	436.63	54
a1363yh	ASD	12_D	9.26	326.24	52
a1364yh	ASD	12_D	10.8	398.07	54
a1365yh	ASD	12_D	15.8	403.01	72
a1366yh	ASD	12_D	11.27	479.46	52
a1367yh	ASD	12_D	9.93	397.78	52
a1368yh	ASD	12_D	10.28	477.79	64
a1369yh	ASD	12_D	13.37	391.15	64
a1370yh	ASD	12_D	11.32	354.3	60
a1371yh	ASD	12_D	13.58	381.64	62
a1372yh	ASD	12_D	10.76	390.97	54
a1373yh	ASD	12_D	11.05	319.46	58
a1374yh	ASD	12_D	11.95	341.92	62
a1375yh	ASD	12_D	10.03	349.92	56
a1376yh	ASD	12_D	9.13	390.07	50
a1377yh	ASD	12_D	10.82	384.38	56
a1378yh	ASD	12_D	9.63	374.35	52
a1379yh	ASD	12_D	11.04	383.49	54
a1380yh	ASD	12_D	11.66	416.66	64
a1381yh	ASD	12_D	10.17	345.48	56
a1382yh	ASD	12_D	9.24	413.72	50
a1383yh	ASD	12_D	11.68	344.84	60
a1384yh	ASD	12_D	11.79	380.8	60
a1385yh	ASD	12_D	11.03	335.34	58
a1386yh	ASD	12_D	11.54	376.79	56
a1387yh	ASD	12_D	10.59	309.74	60
a1388yh	ASD	12_D	10.17	455.05	52
a1389yh	ASD	12_D	8.47	379.24	46
a1390yh	ASD	12_D	10.49	374.43	54
a1391yh	ASD	12_D	11.01	406.36	54
a1392yh	ASD	12_D	10.38	376.92	56
a1393yh	ASD	12_D	11.61	451.03	54
a1394yh	ASD	12_D	9.51	374.09	50
a1395yh	ASD	12_D	10.97	315.61	58
a1396yh	ASD	12_D	11.44	323.52	60
a1397yh	ASD	12_D	8.69	369.51	48
a1398yh	ASD	12_D	10.7	397.33	54
a1399yh	ASD	12_D	11.36	353.43	60
a1400yh	ASD	12_D	10.19	302.7	56
a1401yh	ASD	12_D	10.16	369.24	54
a1402yh	ASD	12_D	10.09	364.15	52
a1403yh	ASD	12_D	8.84	329.4	52
a1404yh	ASD	12_D	8.49	364.88	48
a1405yh	ASD	12_D	10.54	361.42	56
a1406yh	ASD	12_D	9.53	326.75	56
a1407yh	ASD	12_D	9.91	363.54	56
a1408yh	ASD	12_D	10.55	347.27	60
a1409yh	ASD	12_D	11.63	360.43	62
a1410yh	ASD	12_D	11.53	317.79	64
a1411yh	ASD	12_D	11.62	307.87	66
a1412yh	ASD	12_D	11.36	390.25	60
a1413yh	ASD	12_D	10.26	358.84	56
a1414yh	ASD	12_D	11.28	359.43	60
a1415yh	ASD	12_D	9.7	307.45	58
a1416yh	ASD	12_D	9.26	362.33	54
a1417yh	ASD	12_D	9.76	358.9	54
a1418yh	ASD	12_D	10.57	435.42	54
a1419yh	ASD	12_D	9.98	347.66	56
a1420yh	ASD	12_D	11.34	357.95	60
a1421yh	ASD	12_D	10.06	305.91	58
a1422yh	ASD	12_D	9.47	297.37	56
a1423yh	ASD	12_D	10.7	384.45	68
a1424yh	ASD	12_D	11.3	311.65	64
a1425yh	ASD	12_D	11.42	311.64	64
a1426yh	ASD	12_D	10.57	337.04	58
a1427yh	ASD	12_D	10.46	355.79	58
a1428yh	ASD	12_D	8.06	355.65	48
a1429yh	ASD	12_D	10.12	308.03	54
a1430yh	ASD	12_D	10.33	299.12	62
a1431yh	ASD	12_D	9.92	348.72	52
a1432yh	ASD	12_D	9.66	307.36	54
a1433yh	ASD	12_D	8.37	421.39	44
a1434yh	ASD	12_D	11.33	351.83	64
a1435yh	ASD	12_D	11.09	331.78	60
a1436yh	ASD	12_D	7.73	351.66	46
a1437yh	ASD	12_D	10.25	346.38	56
a1438yh	ASD	12_D	8.56	374.91	56
a1439yh	ASD	12_D	10.39	419.59	56
a1440yh	ASD	12_D	9.52	334.91	54
a1441yh	ASD	12_D	10.28	304.89	60
a1442yh	ASD	12_D	10.59	304.12	64
a1443yh	ASD	12_D	11.36	295.8	64
a1444yh	ASD	12_D	10.54	344.09	60
a1445yh	ASD	12_D	10.83	302.86	62
a1446yh	ASD	12_D	10.42	369.58	54
a1447yh	ASD	12_D	10.01	287.45	58
a1448yh	ASD	12_D	9.71	309.65	56
a1449yh	ASD	12_D	9.93	413.75	50
a1450yh	ASD	12_D	10.61	286.75	60
a1451yh	ASD	12_D	9.52	293.02	60
a1452yh	ASD	12_D	9.87	413.85	54
a1453yh	ASD	12_D	11.7	300.96	64
a1454yh	ASD	12_D	7.6	344.32	44
a1455yh	ASD	12_D	11.35	291.72	64
a1456yh	ASD	12_D	10.23	291.4	62
a1457yh	ASD	12_D	9.93	343.73	90
a1458yh	ASD	12_D	10.22	284.52	56
a1459yh	ASD	12_D	11.36	409.74	56
a1460yh	ASD	12_D	9.98	290.18	62
a1461yh	ASD	12_D	9.38	289.79	58
a1462yh	ASD	12_D	10.62	283.09	60
a1463yh	ASD	12_D	10.52	283.04	58
a1464yh	ASD	12_D	12	405.67	56
a1465yh	ASD	12_D	10.52	295.16	58
a1466yh	ASD	12_D	9.62	331.49	54
a1467yh	ASD	12_D	10.06	403.52	56
a1468yh	ASD	12_D	10.72	293.45	62
a1469yh	ASD	12_D	10.99	332.72	60
a1470yh	ASD	12_D	10.28	319.79	58
a1471yh	ASD	12_D	10.82	292.26	62
a1472yh	ASD	12_D	9.35	313.07	54
a1473yh	ASD	12_D	13.53	355.05	66
a1474yh	ASD	12_D	9.54	399.11	54
a1475yh	ASD	12_D	10.07	312.11	54
a1476yh	ASD	12_D	11.58	326.61	60
a1477yh	ASD	12_D	10.6	353.43	56
a1478yh	ASD	12_D	9.41	310.7	58
a1479yh	ASD	12_D	9.86	325.95	54
a1480yh	ASD	12_D	10.95	325.06	62
a1481yh	ASD	12_D	10.53	324.34	60
a1482yh	ASD	12_D	11.07	394.03	60
a1483yh	ASD	12_D	10.04	314.74	56
a1484yh	ASD	12_D	9.39	314.33	54
a1485yh	ASD	12_D	11.06	280.86	64
a1486yh	ASD	12_D	10.6	326.49	58
a1487yh	ASD	12_D	9.85	326.2	58
a1488yh	ASD	12_D	9.73	392.16	52
a1489yh	ASD	12_D	9.34	349.06	54
a1490yh	ASD	12_D	9.23	292.01	56
a1491yh	ASD	12_D	7.47	291.92	46
a1492yh	ASD	12_D	12.08	290.96	64
a1493yh	ASD	12_D	8.89	347.51	56
a1494yh	ASD	12_D	9.99	347.25	58
a1495yh	ASD	12_D	9.06	325.07	60
a1496yh	ASD	12_D	9.5	387.97	64
a1497yh	ASD	12_D	9.74	321.42	56
a1498yh	ASD	12_D	10.61	341.5	58
a1499yh	ASD	12_D	9.77	318.87	56
a1500yh	ASD	12_D	9.21	319.09	54
a1501yh	ASD	12_D	9.66	337.34	54
a1502yh	ASD	12_D	8.43	294.57	54
a1503yh	ASD	12_D	9.83	270.98	62
a1504yh	ASD	12_D	9.11	292.57	56
a1505yh	ASD	12_D	10.73	376.97	58
a1506yh	ASD	12_D	11.26	338.37	60
a1507yh	ASD	12_D	9.96	266.97	60
a1508yh	ASD	12_D	9.84	275.44	146
a1509yh	ASD	12_D	10.52	378.28	56
a1510yh	ASD	12_D	8.6	375.54	48
a1511yh	ASD	12_D	8.36	291.05	54
a1512yh	ASD	12_D	10.45	299.42	60
a1513yh	ASD	12_D	10.57	332.48	58
a1514yh	ASD	12_D	8.11	265.15	56
a1515yh	ASD	12_D	9.13	264.72	60
a1516yh	ASD	12_D	10.24	264.69	60
a1517yh	ASD	12_D	11.65	330.19	68
a1518yh	ASD	12_D	8.22	313.1	50
a1519yh	ASD	12_D	9.59	331.54	62
a1520yh	ASD	12_D	9.29	294.19	62
a1521yh	ASD	12_D	9.39	284.91	56
a1522yh	ASD	12_D	9.64	367.9	54
a1523yh	ASD	12_D	9.4	309.81	58
a1524yh	ASD	12_D	7.83	275.36	56
a1525yh	ASD	12_D	9.67	308.58	54
a1526yh	ASD	12_D	7.97	274.23	52
a1527yh	ASD	12_D	8.29	259.66	54
a1528yh	ASD	12_D	10.46	303.49	58
a1529yh	ASD	12_D	9.87	303.28	56
a1530yh	ASD	12_D	10.09	261.45	64
a1531yh	ASD	12_D	10.02	261.06	62
a1532yh	ASD	12_D	10.84	287.25	64
a1533yh	ASD	12_D	8.98	301.52	56
a1534yh	ASD	12_D	8.52	323.74	56
a1535yh	ASD	12_D	10.46	359.34	56
a1536yh	ASD	12_D	10.04	322.86	54
a1537yh	ASD	12_D	9.51	300.67	62
a1538yh	ASD	12_D	9.3	259.06	60
a1539yh	ASD	12_D	11.02	316.92	64
a1540yh	ASD	12_D	11.09	357.73	56
a1541yh	ASD	12_D	7.44	302.35	48
a1542yh	ASD	12_D	10.03	299.55	58
a1543yh	ASD	12_D	7.41	302.13	48
a1544yh	ASD	12_D	10.05	299.32	62
a1545yh	ASD	12_D	10.48	299.14	62
a1546yh	ASD	12_D	8.84	258	54
a1547yh	ASD	12_D	9.18	273.58	56
a1548yh	ASD	12_D	10.92	261.32	66
a1549yh	ASD	12_D	8.23	271.32	54
a1550yh	ASD	12_D	9.63	312.45	56
a1551yh	ASD	12_D	11.1	351.82	58
a1552yh	ASD	12_D	11.12	254.74	66
a1553yh	ASD	12_D	9.55	257.96	64
a1554yh	ASD	12_D	9.48	264.28	96
a1555yh	ASD	12_D	8.94	252.37	60
a1556yh	ASD	12_D	6.56	291.94	44
a1557yh	ASD	12_D	9.66	285.22	56
a1558yh	ASD	12_D	8.85	264.36	56
a1559yh	ASD	12_D	11.37	263.54	70
a1560yh	ASD	12_D	9.74	282.62	64
a1561yh	ASD	12_D	10.04	274.38	60
a1562yh	ASD	12_D	8.49	262.66	56
a1563yh	ASD	12_D	8.88	262.08	54
a1564yh	ASD	12_D	10.09	346.86	60
a1565yh	ASD	12_D	10.32	287.52	60
a1566yh	ASD	12_D	9.78	290.29	60
a1567yh	ASD	12_D	10.28	345.04	56
a1568yh	ASD	12_D	8.69	344.78	50
a1569yh	ASD	12_D	8.8	256.64	56
a1570yh	ASD	12_D	7.61	253.81	52
a1571yh	ASD	12_D	10.72	302.01	64
a1572yh	ASD	12_D	9.01	334.73	54
a1573yh	ASD	12_D	7.83	334.31	50
a1574yh	ASD	12_D	9.41	265.1	56
a1575yh	ASD	12_D	9.27	336.5	54
a1576yh	ASD	12_D	9.53	278.14	60
a1577yh	ASD	12_D	5.82	277.36	38
a1578yh	ASD	12_D	10.59	328.72	58
a1579yh	ASD	12_D	8.24	248.44	58
a1580yh	ASD	12_D	11.34	267.95	68
a1581yh	ASD	12_D	10.71	295.09	66
a1582yh	ASD	12_D	7.04	272.94	48
a1583yh	ASD	12_D	8.73	271.06	56
a1584yh	ASD	12_D	10.34	320.51	58
a1585yh	ASD	12_D	7.08	269.79	54
a1586yh	ASD	12_D	7.72	282.1	54
a1587yh	ASD	12_D	10	268.27	62
a1588yh	ASD	12_D	9.45	251.47	60
a1589yh	ASD	12_D	11.39	314.03	66
a1590yh	ASD	12_D	9.88	273.75	62
a1591yh	ASD	12_D	8.15	278.98	62
a1592yh	ASD	12_D	9.88	270.78	62
a1593yh	ASD	12_D	9.07	258.64	60
a1594yh	ASD	12_D	7.87	257.98	52
a1595yh	ASD	12_D	9.66	227.63	68
a1596yh	ASD	12_D	11	240.39	72
a1597yh	ASD	12_D	6.61	258.29	46
a1598yh	ASD	12_D	10.86	223.76	72
a1599yh	ASD	12_D	9.92	256.58	60
a1600yh	ASD	12_D	8.54	252.42	56
a1601yh	ASD	12_D	8.6	255.75	80
a1602yh	ASD	12_D	7.16	220.28	50
a1603yh	ASD	12_D	9.44	251.16	60
a1604yh	ASD	12_D	6.87	217.38	52
a1605yh	ASD	12_D	8.63	265.95	62
a1606yh	ASD	12_D	9.78	291.85	58
a1607yh	ASD	12_D	8.29	289.64	56
a1608yh	ASD	12_D	9.06	244.09	70
a1609yh	ASD	12_D	6.58	243.79	46
a1610yh	ASD	12_D	8.78	292.82	58
a1611yh	ASD	12_D	4.35	217.67	36
a1612yh	ASD	12_D	10.33	257.64	66
a1613yh	ASD	12_D	6.48	239.19	50
a1614yh	ASD	12_D	10.12	235.52	66
a1615yh	ASD	12_D	7.06	283.28	44
a1616yh	ASD	12_D	6.42	211.49	50
a1617yh	ASD	12_D	9.21	243.55	62
a1618yh	ASD	12_D	10.86	198.24	76
a1619yh	ASD	12_D	8.02	232.95	60
a1620yh	ASD	12_D	5.97	177.9	54
a1621yh	ASD	12_D	7.98	197.25	60
a1622yh	ASD	12_D	8.28	252.59	58
a1623yh	ASD	12_D	6.87	198.13	52
a1624yh	ASD	12_D	9.25	212.3	74
a1625yh	ASD	12_D	10.61	195.94	84
a1626yh	ASD	12_D	6.62	204.43	56
a1627yh	ASD	12_D	3.73	196.23	32
a1628yh	ASD	12_D	8.77	177.32	136
a1629yh	ASD	12_D	3.98	190.61	36
a1630yh	ASD	12_D	5.36	122.98	58
