# Supplementary material for: The Influence of Irrelevant Visual Distractors on Eye Movement Control in Chinese Children with Autism Spectrum Disorder: Evidence from the Remote Distractor Paradigm
Source: J Autism Dev Disord. 2019 Oct 31;50(2):500–12. doi: 10.1007/s10803-019-04271-y (PMC6994527; doi:10.1007/s10803-019-04271-y)
Supplement: Supplementary file 4 — Supplementary material 4 (XLSX 40 kb) [file 10803_2019_4271_MOESM4_ESM.xlsx]

## Sheet: Sheet1
Participants	Group	TYPE	Distractor_position	First_fixation duration(ms)
15yy	ASD	2nd_CT	FAR	474
t17yyx	TD	2nd_CT	FAR	436
t15xrc	TD	2nd_CT	FAR	272
t13xhy	TD	2nd_CT	FAR	488
t16arl	TD	2nd_CT	FAR	406
t11lyy	TD	2nd_CT	FAR	174
t13xhy	TD	2nd_CT	FAR	514
2tzxm	TD	2nd_CT	FAR	324
t13xhy	TD	2nd_CT	FAR	212
t17yyx	TD	2nd_CT	FAR	926
3ydc	ASD	2nd_CT	FAR	250
15yy	ASD	2nd_CT	FAR	642
t14zrc	TD	2nd_CT	FAR	490
t16arl	TD	2nd_CT	FAR	308
t9wyt	TD	2nd_CT	FAR	696
t11lyy	TD	2nd_CT	FAR	480
t7lzy	TD	2nd_CT	FAR	146
t14zrc	TD	2nd_CT	FAR	458
2zhc	ASD	2nd_CT	FAR	560
t11lyy	TD	2nd_CT	FAR	266
2zhc	ASD	2nd_CT	FAR	462
t16arl	TD	2nd_CT	FAR	180
t7lzy	TD	2nd_CT	FAR	222
2zhc	ASD	2nd_CT	FAR	728
t13xhy	TD	2nd_CT	FAR	190
t15xrc	TD	2nd_CT	FAR	116
2zhc	ASD	2nd_CT	FAR	312
t13xhy	TD	2nd_CT	FAR	114
18wx	ASD	2nd_CT	FAR	444
t13xhy	TD	2nd_CT	FAR	26
6zxy	ASD	2nd_CT	FAR	92
a20xmy	ASD	2nd_CT	FAR	162
15yy	ASD	2nd_CT	FAR	436
t7lzy	TD	2nd_CT	FAR	96
t20llc	TD	2nd_CT	FAR	476
t9wyt	TD	2nd_CT	FAR	144
t16arl	TD	2nd_CT	FAR	178
3ydc	ASD	2nd_CT	FAR	238
t17yyx	TD	2nd_CT	FAR	230
14my	ASD	2nd_CT	FAR	224
t16arl	TD	2nd_CT	FAR	204
t10wlq	TD	2nd_CT	FAR	168
t12wyg	TD	2nd_CT	FAR	400
a22cjr	ASD	2nd_CT	FAR	252
t14zrc	TD	2nd_CT	FAR	236
t15xrc	TD	2nd_CT	FAR	94
t10wlq	TD	2nd_CT	FAR	156
11pp	ASD	2nd_CT	FAR	166
t10wlq	TD	2nd_CT	FAR	264
t9wyt	TD	2nd_CT	FAR	290
3ydc	ASD	2nd_CT	FAR	872
t7lzy	TD	2nd_CT	FAR	62
t16arl	TD	2nd_CT	FAR	144
a21hcy	ASD	2nd_CT	FAR	160
t16arl	TD	2nd_CT	FAR	190
2zhc	ASD	2nd_CT	FAR	494
a22cjr	ASD	2nd_CT	FAR	214
t10wlq	TD	2nd_CT	FAR	170
13cl	ASD	2nd_CT	FAR	138
t15xrc	TD	2nd_CT	FAR	170
t6lcn	TD	2nd_CT	FAR	286
t16arl	TD	2nd_CT	FAR	168
t12wyg	TD	2nd_CT	FAR	248
t17yyx	TD	2nd_CT	FAR	236
4tjsc	TD	2nd_CT	FAR	98
t16arl	TD	2nd_CT	FAR	156
4tjsc	TD	2nd_CT	FAR	40
t6lcn	TD	2nd_CT	FAR	724
t9wyt	TD	2nd_CT	FAR	364
t8lth	TD	2nd_CT	FAR	426
t11lyy	TD	2nd_CT	FAR	104
t11lyy	TD	2nd_CT	FAR	166
a20xmy	ASD	2nd_CT	FAR	210
a20xmy	ASD	2nd_CT	FAR	122
1qhy	ASD	2nd_CT	FAR	166
t11lyy	TD	2nd_CT	FAR	126
t17yyx	TD	2nd_CT	FAR	194
t9wyt	TD	2nd_CT	FAR	160
11pp	ASD	2nd_CT	FAR	376
t10wlq	TD	2nd_CT	FAR	190
4tjsc	TD	2nd_CT	FAR	118
13cl	ASD	2nd_CT	FAR	144
t19zml	TD	2nd_CT	FAR	56
t6lcn	TD	2nd_CT	FAR	530
t18lxz	TD	2nd_CT	FAR	344
14my	ASD	2nd_CT	FAR	260
14my	ASD	2nd_CT	FAR	250
t18lxz	TD	2nd_CT	FAR	218
a20xmy	ASD	2nd_CT	FAR	310
15yy	ASD	2nd_CT	FAR	508
t18lxz	TD	2nd_CT	FAR	170
t10wlq	TD	2nd_CT	FAR	144
t8lth	TD	2nd_CT	FAR	300
4tjsc	TD	2nd_CT	FAR	152
t11lyy	TD	2nd_CT	FAR	72
16lfx	ASD	2nd_CT	FAR	338
6zxy	ASD	2nd_CT	FAR	94
16lfx	ASD	2nd_CT	FAR	160
t8lth	TD	2nd_CT	FAR	432
t18lxz	TD	2nd_CT	FAR	220
14my	ASD	2nd_CT	FAR	226
t17yyx	TD	2nd_CT	FAR	148
5tdxc	TD	2nd_CT	FAR	726
t15xrc	TD	2nd_CT	FAR	562
t13xhy	TD	2nd_CT	FAR	246
t13xhy	TD	2nd_CT	FAR	146
1tlhj	TD	2nd_CT	FAR	184
14my	ASD	2nd_CT	FAR	330
11pp	ASD	2nd_CT	FAR	516
t10wlq	TD	2nd_CT	FAR	146
t13xhy	TD	2nd_CT	FAR	220
t13xhy	TD	2nd_CT	FAR	312
4zhj	ASD	2nd_CT	FAR	198
t10wlq	TD	2nd_CT	FAR	226
t19zml	TD	2nd_CT	FAR	360
a20xmy	ASD	2nd_CT	FAR	184
t9wyt	TD	2nd_CT	FAR	144
t10wlq	TD	2nd_CT	FAR	138
t19zml	TD	2nd_CT	FAR	296
3ydc	ASD	2nd_CT	FAR	242
t20llc	TD	2nd_CT	FAR	554
17xx	ASD	2nd_CT	FAR	276
t10wlq	TD	2nd_CT	FAR	206
17xx	ASD	2nd_CT	FAR	386
11pp	ASD	2nd_CT	FAR	156
t9wyt	TD	2nd_CT	FAR	276
t13xhy	TD	2nd_CT	FAR	388
t8lth	TD	2nd_CT	FAR	190
6zxy	ASD	2nd_CT	FAR	286
t10wlq	TD	2nd_CT	FAR	150
t19zml	TD	2nd_CT	FAR	218
t7lzy	TD	2nd_CT	FAR	162
t7lzy	TD	2nd_CT	FAR	124
2tzxm	TD	2nd_CT	FAR	198
t9wyt	TD	2nd_CT	FAR	278
a22cjr	ASD	2nd_CT	FAR	406
5jhy	ASD	2nd_CT	FAR	264
6zxy	ASD	2nd_CT	FAR	192
2tzxm	TD	2nd_CT	FAR	328
a21hcy	ASD	2nd_CT	FAR	318
5jhy	ASD	2nd_CT	FAR	226
t15xrc	TD	2nd_CT	FAR	518
16lfx	ASD	2nd_CT	FAR	456
6zxy	ASD	2nd_CT	FAR	206
3ydc	ASD	2nd_CT	FAR	226
t12wyg	TD	2nd_CT	FAR	216
2tzxm	TD	2nd_CT	FAR	326
1qhy	ASD	2nd_CT	FAR	120
t14zrc	TD	2nd_CT	FAR	224
5jhy	ASD	2nd_CT	FAR	272
5jhy	ASD	2nd_CT	FAR	670
a21hcy	ASD	2nd_CT	FAR	256
15yy	ASD	2nd_CT	FAR	278
a21hcy	ASD	2nd_CT	FAR	638
t12wyg	TD	2nd_CT	FAR	406
1qhy	ASD	2nd_CT	FAR	172
4tjsc	TD	2nd_CT	FAR	132
t19zml	TD	2nd_CT	FAR	244
6zxy	ASD	2nd_CT	FAR	278
t19zml	TD	2nd_CT	FAR	292
t19zml	TD	2nd_CT	FAR	286
14my	ASD	2nd_CT	FAR	240
17xx	ASD	2nd_CT	FAR	212
a21hcy	ASD	2nd_CT	FAR	958
a22cjr	ASD	2nd_CT	FAR	394
t16arl	TD	2nd_CT	FAR	310
t7lzy	TD	2nd_CT	FAR	104
2zhc	ASD	2nd_CT	FAR	302
t13xhy	TD	2nd_CT	FAR	98
14my	ASD	2nd_CT	FAR	190
t12wyg	TD	2nd_CT	FAR	1146
6zxy	ASD	2nd_CT	FAR	216
t14zrc	TD	2nd_CT	FAR	398
4tjsc	TD	2nd_CT	FAR	602
5tdxc	TD	2nd_CT	FAR	144
t18lxz	TD	2nd_CT	FAR	806
t18lxz	TD	2nd_CT	FAR	270
t9wyt	TD	2nd_CT	FAR	168
t12wyg	TD	2nd_CT	FAR	344
2zhc	ASD	2nd_CT	FAR	474
t7lzy	TD	2nd_CT	FAR	54
t15xrc	TD	2nd_CT	FAR	88
6zxy	ASD	2nd_CT	FAR	194
6zxy	ASD	2nd_CT	FAR	274
6zxy	ASD	2nd_CT	FAR	102
t12wyg	TD	2nd_CT	FAR	474
t19zml	TD	2nd_CT	FAR	282
t12wyg	TD	2nd_CT	FAR	38
13cl	ASD	2nd_CT	FAR	148
1qhy	ASD	2nd_CT	FAR	220
5jhy	ASD	2nd_CT	FAR	324
t8lth	TD	2nd_CT	FAR	390
17xx	ASD	2nd_CT	FAR	136
t20llc	TD	2nd_CT	FAR	540
4zhj	ASD	2nd_CT	FAR	136
t15xrc	TD	2nd_CT	FAR	170
t20llc	TD	2nd_CT	FAR	180
t19zml	TD	2nd_CT	FAR	342
t19zml	TD	2nd_CT	FAR	150
16lfx	ASD	2nd_CT	FAR	228
4tjsc	TD	2nd_CT	FAR	74
5jhy	ASD	2nd_CT	FAR	424
t8lth	TD	2nd_CT	FAR	634
11pp	ASD	2nd_CT	FAR	362
17xx	ASD	2nd_CT	FAR	254
t6lcn	TD	2nd_CT	FAR	194
4zhj	ASD	2nd_CT	FAR	308
t10wlq	TD	2nd_CT	FAR	142
4tjsc	TD	2nd_CT	FAR	218
t6lcn	TD	2nd_CT	FAR	458
t7lzy	TD	2nd_CT	FAR	56
a20xmy	ASD	2nd_CT	FAR	178
t6lcn	TD	2nd_CT	FAR	240
t18lxz	TD	2nd_CT	FAR	214
5tdxc	TD	2nd_CT	FAR	172
t8lth	TD	2nd_CT	FAR	962
a22cjr	ASD	2nd_CT	FAR	172
6zxy	ASD	2nd_CT	FAR	102
1tlhj	TD	lst_CT	FAR	212
2tzxm	TD	lst_CT	FAR	570
t20llc	TD	lst_CT	FAR	66
2tzxm	TD	lst_CT	FAR	170
2tzxm	TD	lst_CT	FAR	298
t18lxz	TD	lst_CT	FAR	156
11pp	ASD	lst_CT	FAR	236
11pp	ASD	lst_CT	FAR	438
t8lth	TD	lst_CT	FAR	854
1tlhj	TD	lst_CT	FAR	182
1tlhj	TD	lst_CT	FAR	166
t9wyt	TD	lst_CT	FAR	184
17xx	ASD	lst_CT	FAR	378
5jhy	ASD	lst_CT	FAR	66
t13xhy	TD	lst_CT	FAR	208
1qhy	ASD	lst_CT	FAR	1296
14my	ASD	lst_CT	FAR	270
a22cjr	ASD	lst_CT	FAR	918
5jhy	ASD	lst_CT	FAR	268
2tzxm	TD	lst_CT	FAR	112
t20llc	TD	lst_CT	FAR	110
1tlhj	TD	lst_CT	FAR	238
t13xhy	TD	lst_CT	FAR	162
4tjsc	TD	lst_CT	FAR	1052
1qhy	ASD	lst_CT	FAR	1287
a20xmy	ASD	lst_CT	FAR	292
3ydc	ASD	lst_CT	FAR	386
t17yyx	TD	lst_CT	FAR	164
17xx	ASD	lst_CT	FAR	376
t10wlq	TD	lst_CT	FAR	172
15yy	ASD	lst_CT	FAR	168
1qhy	ASD	lst_CT	FAR	310
t18lxz	TD	lst_CT	FAR	72
18wx	ASD	lst_CT	FAR	172
3ydc	ASD	lst_CT	FAR	200
t12wyg	TD	lst_CT	FAR	1284
14my	ASD	lst_CT	FAR	292
2tzxm	TD	lst_CT	FAR	124
t7lzy	TD	lst_CT	FAR	226
t8lth	TD	lst_CT	FAR	156
11pp	ASD	lst_CT	FAR	170
t7lzy	TD	lst_CT	FAR	320
t17yyx	TD	lst_CT	FAR	154
t17yyx	TD	lst_CT	FAR	126
t18lxz	TD	lst_CT	FAR	704
17xx	ASD	lst_CT	FAR	818
t7lzy	TD	lst_CT	FAR	210
2tzxm	TD	lst_CT	FAR	320
14my	ASD	lst_CT	FAR	146
1tlhj	TD	lst_CT	FAR	180
t14zrc	TD	lst_CT	FAR	302
t12wyg	TD	lst_CT	FAR	762
t20llc	TD	lst_CT	FAR	444
16lfx	ASD	lst_CT	FAR	194
t10wlq	TD	lst_CT	FAR	218
3ydc	ASD	lst_CT	FAR	348
1tlhj	TD	lst_CT	FAR	228
t17yyx	TD	lst_CT	FAR	134
11pp	ASD	lst_CT	FAR	264
17xx	ASD	lst_CT	FAR	142
14my	ASD	lst_CT	FAR	154
4tjsc	TD	lst_CT	FAR	204
17xx	ASD	lst_CT	FAR	154
17xx	ASD	lst_CT	FAR	144
18wx	ASD	lst_CT	FAR	262
t12wyg	TD	lst_CT	FAR	1068
14my	ASD	lst_CT	FAR	832
t7lzy	TD	lst_CT	FAR	738
1tlhj	TD	lst_CT	FAR	604
t17yyx	TD	lst_CT	FAR	152
5jhy	ASD	lst_CT	FAR	272
5jhy	ASD	lst_CT	FAR	214
4tjsc	TD	lst_CT	FAR	166
15yy	ASD	lst_CT	FAR	300
2zhc	ASD	lst_CT	FAR	344
t11lyy	TD	lst_CT	FAR	162
t16arl	TD	lst_CT	FAR	100
t17yyx	TD	lst_CT	FAR	150
15yy	ASD	lst_CT	FAR	290
2zhc	ASD	lst_CT	FAR	546
t11lyy	TD	lst_CT	FAR	390
a20xmy	ASD	lst_CT	FAR	486
2zhc	ASD	lst_CT	FAR	254
1tlhj	TD	lst_CT	FAR	286
18wx	ASD	lst_CT	FAR	360
3ydc	ASD	lst_CT	FAR	446
13cl	ASD	lst_CT	FAR	254
16lfx	ASD	lst_CT	FAR	652
a20xmy	ASD	lst_CT	FAR	446
t12wyg	TD	lst_CT	FAR	110
t11lyy	TD	lst_CT	FAR	584
16lfx	ASD	lst_CT	FAR	378
2zhc	ASD	lst_CT	FAR	230
t20llc	TD	lst_CT	FAR	602
t11lyy	TD	lst_CT	FAR	180
4tjsc	TD	lst_CT	FAR	336
15yy	ASD	lst_CT	FAR	1256
t11lyy	TD	lst_CT	FAR	200
16lfx	ASD	lst_CT	FAR	194
t7lzy	TD	lst_CT	FAR	1098
t7lzy	TD	lst_CT	FAR	1212
t17yyx	TD	lst_CT	FAR	170
a21hcy	ASD	lst_CT	FAR	1247
t7lzy	TD	lst_CT	FAR	234
t16arl	TD	lst_CT	FAR	274
t7lzy	TD	lst_CT	FAR	184
t11lyy	TD	lst_CT	FAR	126
t19zml	TD	lst_CT	FAR	504
t13xhy	TD	lst_CT	FAR	562
t20llc	TD	lst_CT	FAR	392
t12wyg	TD	lst_CT	FAR	1242
5jhy	ASD	lst_CT	FAR	184
15yy	ASD	lst_CT	FAR	1066
t13xhy	TD	lst_CT	FAR	634
t13xhy	TD	lst_CT	FAR	1228
t7lzy	TD	lst_CT	FAR	164
14my	ASD	lst_CT	FAR	204
6zxy	ASD	lst_CT	FAR	376
t8lth	TD	lst_CT	FAR	150
t9wyt	TD	lst_CT	FAR	214
t20llc	TD	lst_CT	FAR	210
t19zml	TD	lst_CT	FAR	184
t16arl	TD	lst_CT	FAR	666
t16arl	TD	lst_CT	FAR	480
t15xrc	TD	lst_CT	FAR	206
18wx	ASD	lst_CT	FAR	162
14my	ASD	lst_CT	FAR	430
t15xrc	TD	lst_CT	FAR	410
6zxy	ASD	lst_CT	FAR	26
t20llc	TD	lst_CT	FAR	154
t12wyg	TD	lst_CT	FAR	466
4tjsc	TD	lst_CT	FAR	382
t13xhy	TD	lst_CT	FAR	1225
t14zrc	TD	lst_CT	FAR	606
3ydc	ASD	lst_CT	FAR	252
6zxy	ASD	lst_CT	FAR	238
2tzxm	TD	lst_CT	FAR	614
a20xmy	ASD	lst_CT	FAR	160
t10wlq	TD	lst_CT	FAR	166
6zxy	ASD	lst_CT	FAR	180
t12wyg	TD	lst_CT	FAR	158
t16arl	TD	lst_CT	FAR	336
14my	ASD	lst_CT	FAR	168
t8lth	TD	lst_CT	FAR	156
t17yyx	TD	lst_CT	FAR	642
a21hcy	ASD	lst_CT	FAR	158
a21hcy	ASD	lst_CT	FAR	166
t15xrc	TD	lst_CT	FAR	1220
t14zrc	TD	lst_CT	FAR	1213
t13xhy	TD	lst_CT	FAR	156
t14zrc	TD	lst_CT	FAR	394
t13xhy	TD	lst_CT	FAR	160
t18lxz	TD	lst_CT	FAR	364
a21hcy	ASD	lst_CT	FAR	122
t12wyg	TD	lst_CT	FAR	166
18wx	ASD	lst_CT	FAR	450
6zxy	ASD	lst_CT	FAR	140
13cl	ASD	lst_CT	FAR	530
t16arl	TD	lst_CT	FAR	572
a21hcy	ASD	lst_CT	FAR	122
t10wlq	TD	lst_CT	FAR	184
a20xmy	ASD	lst_CT	FAR	182
t9wyt	TD	lst_CT	FAR	240
t19zml	TD	lst_CT	FAR	1210
a20xmy	ASD	lst_CT	FAR	1042
t14zrc	TD	lst_CT	FAR	584
t16arl	TD	lst_CT	FAR	372
t6lcn	TD	lst_CT	FAR	160
t19zml	TD	lst_CT	FAR	304
15yy	ASD	lst_CT	FAR	184
t17yyx	TD	lst_CT	FAR	308
t16arl	TD	lst_CT	FAR	440
t11lyy	TD	lst_CT	FAR	296
t7lzy	TD	lst_CT	FAR	244
t9wyt	TD	lst_CT	FAR	246
3ydc	ASD	lst_CT	FAR	434
5jhy	ASD	lst_CT	FAR	1200
t14zrc	TD	lst_CT	FAR	648
a21hcy	ASD	lst_CT	FAR	102
4zhj	ASD	lst_CT	FAR	380
a20xmy	ASD	lst_CT	FAR	324
t12wyg	TD	lst_CT	FAR	344
t15xrc	TD	lst_CT	FAR	56
t19zml	TD	lst_CT	FAR	370
17xx	ASD	lst_CT	FAR	208
4tjsc	TD	lst_CT	FAR	430
14my	ASD	lst_CT	FAR	456
t12wyg	TD	lst_CT	FAR	616
t7lzy	TD	lst_CT	FAR	1193
16lfx	ASD	lst_CT	FAR	220
a21hcy	ASD	lst_CT	FAR	388
a22cjr	ASD	lst_CT	FAR	364
t18lxz	TD	lst_CT	FAR	440
t16arl	TD	lst_CT	FAR	594
t9wyt	TD	lst_CT	FAR	262
13cl	ASD	lst_CT	FAR	192
15yy	ASD	lst_CT	FAR	182
2zhc	ASD	lst_CT	FAR	568
t11lyy	TD	lst_CT	FAR	684
11pp	ASD	lst_CT	FAR	228
t14zrc	TD	lst_CT	FAR	730
t15xrc	TD	lst_CT	FAR	678
t8lth	TD	lst_CT	FAR	468
14my	ASD	lst_CT	FAR	200
1qhy	ASD	lst_CT	FAR	1032
1qhy	ASD	lst_CT	FAR	608
4tjsc	TD	lst_CT	FAR	188
t6lcn	TD	lst_CT	FAR	530
t12wyg	TD	lst_CT	FAR	248
a21hcy	ASD	lst_CT	FAR	36
13cl	ASD	lst_CT	FAR	244
13cl	ASD	lst_CT	FAR	282
1qhy	ASD	lst_CT	FAR	710
t8lth	TD	lst_CT	FAR	726
t9wyt	TD	lst_CT	FAR	144
t10wlq	TD	lst_CT	FAR	1179
t7lzy	TD	lst_CT	FAR	1171
t14zrc	TD	lst_CT	FAR	140
13cl	ASD	lst_CT	FAR	696
a22cjr	ASD	lst_CT	FAR	190
t13xhy	TD	lst_CT	FAR	148
1qhy	ASD	lst_CT	FAR	1167
3ydc	ASD	lst_CT	FAR	192
t19zml	TD	lst_CT	FAR	1080
t10wlq	TD	lst_CT	FAR	1054
13cl	ASD	lst_CT	FAR	210
t19zml	TD	lst_CT	FAR	258
t10wlq	TD	lst_CT	FAR	936
a22cjr	ASD	lst_CT	FAR	1165
a20xmy	ASD	lst_CT	FAR	586
1qhy	ASD	lst_CT	FAR	564
4tjsc	TD	lst_CT	FAR	1148
4tjsc	TD	lst_CT	FAR	588
4tjsc	TD	lst_CT	FAR	370
t8lth	TD	lst_CT	FAR	1156
t18lxz	TD	lst_CT	FAR	308
t9wyt	TD	lst_CT	FAR	184
a22cjr	ASD	lst_CT	FAR	232
2zhc	ASD	lst_CT	FAR	892
t15xrc	TD	lst_CT	FAR	388
5tdxc	TD	lst_CT	FAR	206
t8lth	TD	lst_CT	FAR	544
16lfx	ASD	lst_CT	FAR	498
a22cjr	ASD	lst_CT	FAR	440
t16arl	TD	lst_CT	FAR	736
t17yyx	TD	lst_CT	FAR	1149
2tzxm	TD	lst_CT	FAR	702
13cl	ASD	lst_CT	FAR	280
4zhj	ASD	lst_CT	FAR	210
t19zml	TD	lst_CT	FAR	1148
a22cjr	ASD	lst_CT	FAR	430
t18lxz	TD	lst_CT	FAR	448
t7lzy	TD	lst_CT	FAR	424
t19zml	TD	lst_CT	FAR	1139
a22cjr	ASD	lst_CT	FAR	652
4zhj	ASD	lst_CT	FAR	280
t15xrc	TD	lst_CT	FAR	146
t17yyx	TD	lst_CT	FAR	1136
4tjsc	TD	lst_CT	FAR	910
t19zml	TD	lst_CT	FAR	1133
4zhj	ASD	lst_CT	FAR	238
2zhc	ASD	lst_CT	FAR	292
t12wyg	TD	lst_CT	FAR	528
t8lth	TD	lst_CT	FAR	598
t8lth	TD	lst_CT	FAR	554
2tzxm	TD	lst_CT	FAR	530
5tdxc	TD	lst_CT	FAR	400
t8lth	TD	lst_CT	FAR	1129
t8lth	TD	lst_CT	FAR	654
t18lxz	TD	lst_CT	FAR	448
t11lyy	TD	lst_CT	FAR	272
13cl	ASD	lst_CT	FAR	278
5tdxc	TD	lst_CT	FAR	388
t15xrc	TD	lst_CT	FAR	276
t15xrc	TD	lst_CT	FAR	204
t16arl	TD	lst_CT	FAR	302
a20xmy	ASD	lst_CT	FAR	444
5tdxc	TD	lst_CT	FAR	214
a20xmy	ASD	lst_CT	FAR	334
t17yyx	TD	lst_CT	FAR	954
17xx	ASD	lst_CT	FAR	146
a22cjr	ASD	lst_CT	FAR	822
4zhj	ASD	lst_CT	FAR	136
a20xmy	ASD	lst_CT	FAR	356
t15xrc	TD	lst_CT	FAR	246
t10wlq	TD	lst_CT	FAR	1118
4tjsc	TD	lst_CT	FAR	274
a22cjr	ASD	lst_CT	FAR	1111
t17yyx	TD	lst_CT	FAR	1113
a22cjr	ASD	lst_CT	FAR	336
t14zrc	TD	lst_CT	FAR	890
5tdxc	TD	lst_CT	FAR	446
t16arl	TD	lst_CT	FAR	106
5jhy	ASD	lst_CT	FAR	742
a20xmy	ASD	lst_CT	FAR	250
t18lxz	TD	lst_CT	FAR	318
14my	ASD	lst_CT	FAR	120
a22cjr	ASD	lst_CT	FAR	188
t17yyx	TD	lst_CT	FAR	1106
t6lcn	TD	lst_CT	FAR	328
t10wlq	TD	lst_CT	FAR	472
2tzxm	TD	lst_CT	FAR	656
a22cjr	ASD	lst_CT	FAR	1097
t12wyg	TD	lst_CT	FAR	158
t14zrc	TD	lst_CT	FAR	370
t18lxz	TD	lst_CT	FAR	654
t9wyt	TD	lst_CT	FAR	182
16lfx	ASD	lst_CT	FAR	370
4zhj	ASD	lst_CT	FAR	222
1qhy	ASD	lst_CT	FAR	604
a22cjr	ASD	lst_CT	FAR	870
t10wlq	TD	lst_CT	FAR	170
2tzxm	TD	lst_CT	FAR	170
t18lxz	TD	lst_CT	FAR	224
5tdxc	TD	lst_CT	FAR	256
2tzxm	TD	lst_CT	FAR	706
t19zml	TD	lst_CT	FAR	162
1tlhj	TD	lst_CT	FAR	1056
t6lcn	TD	lst_CT	FAR	424
t14zrc	TD	lst_CT	FAR	188
a20xmy	ASD	lst_CT	FAR	456
14my	ASD	lst_CT	FAR	146
a22cjr	ASD	lst_CT	FAR	146
16lfx	ASD	lst_CT	FAR	716
5tdxc	TD	lst_CT	FAR	180
t8lth	TD	lst_CT	FAR	226
t14zrc	TD	lst_CT	FAR	1057
t19zml	TD	lst_CT	FAR	1050
t14zrc	TD	lst_CT	FAR	936
t14zrc	TD	lst_CT	FAR	1056
a20xmy	ASD	lst_CT	FAR	504
t6lcn	TD	lst_CT	FAR	954
5tdxc	TD	lst_CT	FAR	182
a22cjr	ASD	lst_CT	FAR	396
1qhy	ASD	lst_CT	FAR	390
6zxy	ASD	lst_CT	FAR	1040
17xx	ASD	lst_CT	FAR	478
5tdxc	TD	lst_CT	FAR	546
5tdxc	TD	lst_CT	FAR	1040
6zxy	ASD	lst_CT	FAR	292
4zhj	ASD	lst_CT	FAR	416
4zhj	ASD	lst_CT	FAR	214
t14zrc	TD	lst_CT	FAR	806
t6lcn	TD	lst_CT	FAR	404
16lfx	ASD	lst_CT	FAR	170
16lfx	ASD	lst_CT	FAR	410
2tzxm	TD	lst_CT	FAR	226
t14zrc	TD	lst_CT	FAR	186
t8lth	TD	lst_CT	FAR	1036
2tzxm	TD	lst_CT	FAR	208
16lfx	ASD	lst_CT	FAR	518
16lfx	ASD	lst_CT	FAR	440
2zhc	ASD	lst_CT	FAR	270
2zhc	ASD	lst_CT	FAR	256
16lfx	ASD	lst_CT	FAR	510
16lfx	ASD	lst_CT	FAR	718
6zxy	ASD	lst_CT	FAR	326
16lfx	ASD	lst_CT	FAR	774
t18lxz	TD	lst_CT	FAR	108
a21hcy	ASD	lst_CT	FAR	490
a20xmy	ASD	lst_CT	FAR	628
t6lcn	TD	lst_CT	FAR	732
16lfx	ASD	lst_CT	FAR	132
5tdxc	TD	lst_CT	FAR	668
a20xmy	ASD	lst_CT	FAR	216
5tdxc	TD	lst_CT	FAR	436
t14zrc	TD	lst_CT	FAR	962
4zhj	ASD	lst_CT	FAR	800
t18lxz	TD	lst_CT	FAR	52
t15xrc	TD	lst_CT	FAR	196
5tdxc	TD	lst_CT	FAR	908
t19zml	TD	lst_CT	FAR	894
2zhc	ASD	lst_CT	FAR	258
t14zrc	TD	lst_CT	FAR	816
4zhj	ASD	lst_CT	FAR	182
t8lth	TD	lst_CT	FAR	504
4zhj	ASD	lst_CT	FAR	532
t17yyx	TD	lst_CT	FAR	164
2tzxm	TD	2nd_CT	NR	398
2tzxm	TD	2nd_CT	NR	658
t13xhy	TD	2nd_CT	NR	416
1qhy	ASD	2nd_CT	NR	250
4tjsc	TD	2nd_CT	NR	160
4tjsc	TD	2nd_CT	NR	332
t8lth	TD	2nd_CT	NR	518
t9wyt	TD	2nd_CT	NR	170
1tlhj	TD	2nd_CT	NR	86
t13xhy	TD	2nd_CT	NR	120
t7lzy	TD	2nd_CT	NR	196
t10wlq	TD	2nd_CT	NR	212
3ydc	ASD	2nd_CT	NR	408
t13xhy	TD	2nd_CT	NR	186
t17yyx	TD	2nd_CT	NR	642
3ydc	ASD	2nd_CT	NR	184
3ydc	ASD	2nd_CT	NR	324
t8lth	TD	2nd_CT	NR	216
t15xrc	TD	2nd_CT	NR	284
5jhy	ASD	2nd_CT	NR	168
5jhy	ASD	2nd_CT	NR	154
t17yyx	TD	2nd_CT	NR	184
5jhy	ASD	2nd_CT	NR	218
t10wlq	TD	2nd_CT	NR	320
t8lth	TD	2nd_CT	NR	888
t15xrc	TD	2nd_CT	NR	330
t8lth	TD	2nd_CT	NR	380
t12wyg	TD	2nd_CT	NR	422
4tjsc	TD	2nd_CT	NR	152
t10wlq	TD	2nd_CT	NR	150
t11lyy	TD	2nd_CT	NR	150
t17yyx	TD	2nd_CT	NR	152
t6lcn	TD	2nd_CT	NR	178
t17yyx	TD	2nd_CT	NR	350
t9wyt	TD	2nd_CT	NR	232
t12wyg	TD	2nd_CT	NR	518
t14zrc	TD	2nd_CT	NR	160
t8lth	TD	2nd_CT	NR	224
15yy	ASD	2nd_CT	NR	422
t17yyx	TD	2nd_CT	NR	184
t6lcn	TD	2nd_CT	NR	274
t12wyg	TD	2nd_CT	NR	122
6zxy	ASD	2nd_CT	NR	240
1qhy	ASD	2nd_CT	NR	130
t6lcn	TD	2nd_CT	NR	314
t7lzy	TD	2nd_CT	NR	150
t14zrc	TD	2nd_CT	NR	712
t11lyy	TD	2nd_CT	NR	148
t17yyx	TD	2nd_CT	NR	248
t6lcn	TD	2nd_CT	NR	312
t17yyx	TD	2nd_CT	NR	400
6zxy	ASD	2nd_CT	NR	162
t10wlq	TD	2nd_CT	NR	156
t7lzy	TD	2nd_CT	NR	134
t15xrc	TD	2nd_CT	NR	158
18wx	ASD	2nd_CT	NR	210
t16arl	TD	2nd_CT	NR	494
t14zrc	TD	2nd_CT	NR	178
t6lcn	TD	2nd_CT	NR	300
t14zrc	TD	2nd_CT	NR	328
4zhj	ASD	2nd_CT	NR	210
t7lzy	TD	2nd_CT	NR	232
t13xhy	TD	2nd_CT	NR	114
t13xhy	TD	2nd_CT	NR	78
18wx	ASD	2nd_CT	NR	404
t13xhy	TD	2nd_CT	NR	216
5tdxc	TD	2nd_CT	NR	742
t10wlq	TD	2nd_CT	NR	196
18wx	ASD	2nd_CT	NR	222
t16arl	TD	2nd_CT	NR	136
t15xrc	TD	2nd_CT	NR	246
4zhj	ASD	2nd_CT	NR	166
t10wlq	TD	2nd_CT	NR	158
1qhy	ASD	2nd_CT	NR	106
a20xmy	ASD	2nd_CT	NR	156
11pp	ASD	2nd_CT	NR	232
t9wyt	TD	2nd_CT	NR	160
a20xmy	ASD	2nd_CT	NR	366
a20xmy	ASD	2nd_CT	NR	148
t11lyy	TD	2nd_CT	NR	120
t19zml	TD	2nd_CT	NR	176
t16arl	TD	2nd_CT	NR	152
a21hcy	ASD	2nd_CT	NR	264
t9wyt	TD	2nd_CT	NR	242
11pp	ASD	2nd_CT	NR	218
t19zml	TD	2nd_CT	NR	230
16lfx	ASD	2nd_CT	NR	410
a22cjr	ASD	2nd_CT	NR	178
t8lth	TD	2nd_CT	NR	414
t14zrc	TD	2nd_CT	NR	152
t16arl	TD	2nd_CT	NR	156
t8lth	TD	2nd_CT	NR	438
a20xmy	ASD	2nd_CT	NR	156
a20xmy	ASD	2nd_CT	NR	190
a20xmy	ASD	2nd_CT	NR	298
t10wlq	TD	2nd_CT	NR	440
2tzxm	TD	2nd_CT	NR	212
16lfx	ASD	2nd_CT	NR	250
4zhj	ASD	2nd_CT	NR	270
16lfx	ASD	2nd_CT	NR	230
2tzxm	TD	2nd_CT	NR	504
1tlhj	TD	2nd_CT	NR	350
5jhy	ASD	2nd_CT	NR	244
15yy	ASD	2nd_CT	NR	374
14my	ASD	2nd_CT	NR	416
5jhy	ASD	2nd_CT	NR	194
t13xhy	TD	2nd_CT	NR	360
t13xhy	TD	2nd_CT	NR	156
t8lth	TD	2nd_CT	NR	474
t10wlq	TD	2nd_CT	NR	154
t11lyy	TD	2nd_CT	NR	158
t13xhy	TD	2nd_CT	NR	182
t13xhy	TD	2nd_CT	NR	168
1tlhj	TD	2nd_CT	NR	322
15yy	ASD	2nd_CT	NR	504
3ydc	ASD	2nd_CT	NR	270
14my	ASD	2nd_CT	NR	326
t11lyy	TD	2nd_CT	NR	242
t7lzy	TD	2nd_CT	NR	150
t13xhy	TD	2nd_CT	NR	240
1qhy	ASD	2nd_CT	NR	248
t12wyg	TD	2nd_CT	NR	418
17xx	ASD	2nd_CT	NR	412
17xx	ASD	2nd_CT	NR	188
6zxy	ASD	2nd_CT	NR	518
17xx	ASD	2nd_CT	NR	246
1qhy	ASD	2nd_CT	NR	108
t7lzy	TD	2nd_CT	NR	104
17xx	ASD	2nd_CT	NR	372
t13xhy	TD	2nd_CT	NR	154
1tlhj	TD	2nd_CT	NR	232
16lfx	ASD	2nd_CT	NR	390
t7lzy	TD	2nd_CT	NR	124
6zxy	ASD	2nd_CT	NR	358
5jhy	ASD	2nd_CT	NR	176
t19zml	TD	2nd_CT	NR	586
6zxy	ASD	2nd_CT	NR	210
11pp	ASD	2nd_CT	NR	246
a21hcy	ASD	2nd_CT	NR	548
2tzxm	TD	2nd_CT	NR	350
14my	ASD	2nd_CT	NR	194
6zxy	ASD	2nd_CT	NR	218
t10wlq	TD	2nd_CT	NR	160
t7lzy	TD	2nd_CT	NR	182
t16arl	TD	2nd_CT	NR	350
a21hcy	ASD	2nd_CT	NR	278
a21hcy	ASD	2nd_CT	NR	202
4tjsc	TD	2nd_CT	NR	424
a21hcy	ASD	2nd_CT	NR	282
a20xmy	ASD	2nd_CT	NR	322
a21hcy	ASD	2nd_CT	NR	664
6zxy	ASD	2nd_CT	NR	238
a22cjr	ASD	2nd_CT	NR	296
a21hcy	ASD	2nd_CT	NR	244
a20xmy	ASD	2nd_CT	NR	176
a22cjr	ASD	2nd_CT	NR	156
6zxy	ASD	2nd_CT	NR	242
t19zml	TD	2nd_CT	NR	352
t13xhy	TD	2nd_CT	NR	142
1qhy	ASD	2nd_CT	NR	198
t19zml	TD	2nd_CT	NR	590
t12wyg	TD	2nd_CT	NR	78
14my	ASD	2nd_CT	NR	234
5jhy	ASD	2nd_CT	NR	186
16lfx	ASD	2nd_CT	NR	216
a22cjr	ASD	2nd_CT	NR	176
4tjsc	TD	2nd_CT	NR	1026
11pp	ASD	2nd_CT	NR	200
t12wyg	TD	2nd_CT	NR	274
13cl	ASD	2nd_CT	NR	194
t15xrc	TD	2nd_CT	NR	150
a20xmy	ASD	2nd_CT	NR	150
16lfx	ASD	2nd_CT	NR	316
2zhc	ASD	2nd_CT	NR	312
t8lth	TD	2nd_CT	NR	150
a21hcy	ASD	2nd_CT	NR	218
t19zml	TD	2nd_CT	NR	930
t19zml	TD	2nd_CT	NR	346
t12wyg	TD	2nd_CT	NR	388
1qhy	ASD	2nd_CT	NR	114
a21hcy	ASD	2nd_CT	NR	390
t16arl	TD	2nd_CT	NR	1078
4tjsc	TD	2nd_CT	NR	124
t15xrc	TD	2nd_CT	NR	168
16lfx	ASD	2nd_CT	NR	326
1qhy	ASD	2nd_CT	NR	120
t18lxz	TD	2nd_CT	NR	278
t6lcn	TD	2nd_CT	NR	302
a22cjr	ASD	2nd_CT	NR	168
a20xmy	ASD	2nd_CT	NR	258
17xx	ASD	2nd_CT	NR	260
16lfx	ASD	2nd_CT	NR	268
2tzxm	TD	2nd_CT	NR	110
t11lyy	TD	2nd_CT	NR	626
t20llc	TD	2nd_CT	NR	688
2zhc	ASD	2nd_CT	NR	314
a22cjr	ASD	2nd_CT	NR	302
2tzxm	TD	lst_CT	NR	194
t14zrc	TD	lst_CT	NR	194
t20llc	TD	lst_CT	NR	454
2tzxm	TD	lst_CT	NR	878
3ydc	ASD	lst_CT	NR	226
t20llc	TD	lst_CT	NR	114
1tlhj	TD	lst_CT	NR	190
a20xmy	ASD	lst_CT	NR	232
3ydc	ASD	lst_CT	NR	208
t13xhy	TD	lst_CT	NR	564
t15xrc	TD	lst_CT	NR	302
t9wyt	TD	lst_CT	NR	182
2tzxm	TD	lst_CT	NR	238
14my	ASD	lst_CT	NR	254
2tzxm	TD	lst_CT	NR	1126
t13xhy	TD	lst_CT	NR	1305
t9wyt	TD	lst_CT	NR	436
t8lth	TD	lst_CT	NR	1315
1tlhj	TD	lst_CT	NR	192
14my	ASD	lst_CT	NR	238
t13xhy	TD	lst_CT	NR	1312
17xx	ASD	lst_CT	NR	446
t20llc	TD	lst_CT	NR	148
4tjsc	TD	lst_CT	NR	28
t11lyy	TD	lst_CT	NR	266
t8lth	TD	lst_CT	NR	986
3ydc	ASD	lst_CT	NR	486
14my	ASD	lst_CT	NR	152
t13xhy	TD	lst_CT	NR	158
14my	ASD	lst_CT	NR	230
t17yyx	TD	lst_CT	NR	1114
t11lyy	TD	lst_CT	NR	436
3ydc	ASD	lst_CT	NR	342
3ydc	ASD	lst_CT	NR	628
t10wlq	TD	lst_CT	NR	328
t17yyx	TD	lst_CT	NR	1299
18wx	ASD	lst_CT	NR	1204
t8lth	TD	lst_CT	NR	176
t9wyt	TD	lst_CT	NR	1038
14my	ASD	lst_CT	NR	148
t9wyt	TD	lst_CT	NR	1092
t8lth	TD	lst_CT	NR	1297
14my	ASD	lst_CT	NR	450
t13xhy	TD	lst_CT	NR	686
t7lzy	TD	lst_CT	NR	1291
1tlhj	TD	lst_CT	NR	584
t15xrc	TD	lst_CT	NR	268
t10wlq	TD	lst_CT	NR	406
1qhy	ASD	lst_CT	NR	264
t17yyx	TD	lst_CT	NR	1297
13cl	ASD	lst_CT	NR	152
17xx	ASD	lst_CT	NR	166
3ydc	ASD	lst_CT	NR	266
t15xrc	TD	lst_CT	NR	194
t11lyy	TD	lst_CT	NR	272
t7lzy	TD	lst_CT	NR	204
17xx	ASD	lst_CT	NR	346
1tlhj	TD	lst_CT	NR	1094
t9wyt	TD	lst_CT	NR	324
14my	ASD	lst_CT	NR	274
6zxy	ASD	lst_CT	NR	356
14my	ASD	lst_CT	NR	424
4tjsc	TD	lst_CT	NR	154
t15xrc	TD	lst_CT	NR	246
t7lzy	TD	lst_CT	NR	1283
14my	ASD	lst_CT	NR	270
5jhy	ASD	lst_CT	NR	172
t13xhy	TD	lst_CT	NR	110
t17yyx	TD	lst_CT	NR	164
t9wyt	TD	lst_CT	NR	432
1tlhj	TD	lst_CT	NR	1279
t7lzy	TD	lst_CT	NR	1271
11pp	ASD	lst_CT	NR	234
t11lyy	TD	lst_CT	NR	66
4tjsc	TD	lst_CT	NR	104
15yy	ASD	lst_CT	NR	1272
1qhy	ASD	lst_CT	NR	598
1tlhj	TD	lst_CT	NR	1273
t16arl	TD	lst_CT	NR	1275
t17yyx	TD	lst_CT	NR	194
5jhy	ASD	lst_CT	NR	1172
t15xrc	TD	lst_CT	NR	966
1tlhj	TD	lst_CT	NR	232
t9wyt	TD	lst_CT	NR	748
14my	ASD	lst_CT	NR	148
t11lyy	TD	lst_CT	NR	576
t17yyx	TD	lst_CT	NR	432
14my	ASD	lst_CT	NR	218
15yy	ASD	lst_CT	NR	168
17xx	ASD	lst_CT	NR	188
t14zrc	TD	lst_CT	NR	954
t19zml	TD	lst_CT	NR	1267
5jhy	ASD	lst_CT	NR	424
5jhy	ASD	lst_CT	NR	1274
t12wyg	TD	lst_CT	NR	248
t17yyx	TD	lst_CT	NR	1164
t12wyg	TD	lst_CT	NR	192
t20llc	TD	lst_CT	NR	514
2zhc	ASD	lst_CT	NR	778
1tlhj	TD	lst_CT	NR	204
t7lzy	TD	lst_CT	NR	130
15yy	ASD	lst_CT	NR	202
15yy	ASD	lst_CT	NR	1150
18wx	ASD	lst_CT	NR	804
1qhy	ASD	lst_CT	NR	516
t20llc	TD	lst_CT	NR	112
15yy	ASD	lst_CT	NR	1261
17xx	ASD	lst_CT	NR	174
t13xhy	TD	lst_CT	NR	416
t14zrc	TD	lst_CT	NR	238
t7lzy	TD	lst_CT	NR	124
t12wyg	TD	lst_CT	NR	1258
16lfx	ASD	lst_CT	NR	538
14my	ASD	lst_CT	NR	818
t10wlq	TD	lst_CT	NR	174
15yy	ASD	lst_CT	NR	176
t18lxz	TD	lst_CT	NR	694
t13xhy	TD	lst_CT	NR	162
t16arl	TD	lst_CT	NR	144
t9wyt	TD	lst_CT	NR	354
17xx	ASD	lst_CT	NR	602
t10wlq	TD	lst_CT	NR	212
t7lzy	TD	lst_CT	NR	1244
a21hcy	ASD	lst_CT	NR	314
6zxy	ASD	lst_CT	NR	1228
t12wyg	TD	lst_CT	NR	1244
6zxy	ASD	lst_CT	NR	168
t11lyy	TD	lst_CT	NR	190
t13xhy	TD	lst_CT	NR	1234
t19zml	TD	lst_CT	NR	1243
4tjsc	TD	lst_CT	NR	900
t18lxz	TD	lst_CT	NR	254
a22cjr	ASD	lst_CT	NR	428
t7lzy	TD	lst_CT	NR	196
t15xrc	TD	lst_CT	NR	232
t6lcn	TD	lst_CT	NR	290
t12wyg	TD	lst_CT	NR	722
t17yyx	TD	lst_CT	NR	800
17xx	ASD	lst_CT	NR	170
t17yyx	TD	lst_CT	NR	1237
t19zml	TD	lst_CT	NR	326
1tlhj	TD	lst_CT	NR	766
18wx	ASD	lst_CT	NR	388
1tlhj	TD	lst_CT	NR	208
t20llc	TD	lst_CT	NR	136
13cl	ASD	lst_CT	NR	450
t20llc	TD	lst_CT	NR	436
t7lzy	TD	lst_CT	NR	556
4zhj	ASD	lst_CT	NR	250
4tjsc	TD	lst_CT	NR	196
4tjsc	TD	lst_CT	NR	152
4tjsc	TD	lst_CT	NR	130
t20llc	TD	lst_CT	NR	768
6zxy	ASD	lst_CT	NR	154
6zxy	ASD	lst_CT	NR	360
t16arl	TD	lst_CT	NR	590
t12wyg	TD	lst_CT	NR	958
t10wlq	TD	lst_CT	NR	774
t16arl	TD	lst_CT	NR	816
a21hcy	ASD	lst_CT	NR	514
18wx	ASD	lst_CT	NR	206
4tjsc	TD	lst_CT	NR	358
t7lzy	TD	lst_CT	NR	380
t10wlq	TD	lst_CT	NR	350
t19zml	TD	lst_CT	NR	556
t9wyt	TD	lst_CT	NR	670
16lfx	ASD	lst_CT	NR	640
t6lcn	TD	lst_CT	NR	864
11pp	ASD	lst_CT	NR	282
a21hcy	ASD	lst_CT	NR	140
t12wyg	TD	lst_CT	NR	1215
t19zml	TD	lst_CT	NR	1066
4zhj	ASD	lst_CT	NR	210
2tzxm	TD	lst_CT	NR	1217
t12wyg	TD	lst_CT	NR	1215
6zxy	ASD	lst_CT	NR	204
t11lyy	TD	lst_CT	NR	174
t12wyg	TD	lst_CT	NR	1108
t16arl	TD	lst_CT	NR	436
t11lyy	TD	lst_CT	NR	372
5tdxc	TD	lst_CT	NR	1217
13cl	ASD	lst_CT	NR	370
t17yyx	TD	lst_CT	NR	270
t7lzy	TD	lst_CT	NR	210
a20xmy	ASD	lst_CT	NR	900
t13xhy	TD	lst_CT	NR	1214
1qhy	ASD	lst_CT	NR	510
t16arl	TD	lst_CT	NR	504
a21hcy	ASD	lst_CT	NR	254
t7lzy	TD	lst_CT	NR	168
a21hcy	ASD	lst_CT	NR	378
a21hcy	ASD	lst_CT	NR	122
a20xmy	ASD	lst_CT	NR	246
t12wyg	TD	lst_CT	NR	1156
t14zrc	TD	lst_CT	NR	664
18wx	ASD	lst_CT	NR	224
t18lxz	TD	lst_CT	NR	268
t7lzy	TD	lst_CT	NR	1192
t12wyg	TD	lst_CT	NR	208
a20xmy	ASD	lst_CT	NR	236
t10wlq	TD	lst_CT	NR	882
t19zml	TD	lst_CT	NR	760
11pp	ASD	lst_CT	NR	236
4tjsc	TD	lst_CT	NR	154
t19zml	TD	lst_CT	NR	854
a22cjr	ASD	lst_CT	NR	454
a20xmy	ASD	lst_CT	NR	408
3ydc	ASD	lst_CT	NR	224
t12wyg	TD	lst_CT	NR	492
a21hcy	ASD	lst_CT	NR	1186
13cl	ASD	lst_CT	NR	204
2zhc	ASD	lst_CT	NR	512
13cl	ASD	lst_CT	NR	260
t19zml	TD	lst_CT	NR	1117
t15xrc	TD	lst_CT	NR	1184
t6lcn	TD	lst_CT	NR	930
13cl	ASD	lst_CT	NR	820
11pp	ASD	lst_CT	NR	212
t11lyy	TD	lst_CT	NR	1177
a21hcy	ASD	lst_CT	NR	1010
4tjsc	TD	lst_CT	NR	270
a22cjr	ASD	lst_CT	NR	1177
t16arl	TD	lst_CT	NR	1180
t14zrc	TD	lst_CT	NR	1016
a22cjr	ASD	lst_CT	NR	610
t6lcn	TD	lst_CT	NR	180
a20xmy	ASD	lst_CT	NR	336
t17yyx	TD	lst_CT	NR	308
13cl	ASD	lst_CT	NR	352
t6lcn	TD	lst_CT	NR	556
6zxy	ASD	lst_CT	NR	860
t11lyy	TD	lst_CT	NR	170
a22cjr	ASD	lst_CT	NR	526
a21hcy	ASD	lst_CT	NR	284
a20xmy	ASD	lst_CT	NR	434
t7lzy	TD	lst_CT	NR	1151
t17yyx	TD	lst_CT	NR	884
t8lth	TD	lst_CT	NR	1155
a20xmy	ASD	lst_CT	NR	628
13cl	ASD	lst_CT	NR	212
a22cjr	ASD	lst_CT	NR	1156
t16arl	TD	lst_CT	NR	284
t15xrc	TD	lst_CT	NR	208
t15xrc	TD	lst_CT	NR	930
t6lcn	TD	lst_CT	NR	438
2zhc	ASD	lst_CT	NR	424
2zhc	ASD	lst_CT	NR	372
t15xrc	TD	lst_CT	NR	152
t8lth	TD	lst_CT	NR	1141
5tdxc	TD	lst_CT	NR	1108
t10wlq	TD	lst_CT	NR	800
16lfx	ASD	lst_CT	NR	354
a22cjr	ASD	lst_CT	NR	1138
t14zrc	TD	lst_CT	NR	376
t16arl	TD	lst_CT	NR	328
t8lth	TD	lst_CT	NR	1135
a22cjr	ASD	lst_CT	NR	284
t18lxz	TD	lst_CT	NR	1050
t15xrc	TD	lst_CT	NR	192
t19zml	TD	lst_CT	NR	702
t19zml	TD	lst_CT	NR	1128
13cl	ASD	lst_CT	NR	726
6zxy	ASD	lst_CT	NR	178
5tdxc	TD	lst_CT	NR	558
t12wyg	TD	lst_CT	NR	1130
5tdxc	TD	lst_CT	NR	756
16lfx	ASD	lst_CT	NR	262
a20xmy	ASD	lst_CT	NR	404
t14zrc	TD	lst_CT	NR	526
t19zml	TD	lst_CT	NR	808
t8lth	TD	lst_CT	NR	1129
t17yyx	TD	lst_CT	NR	1123
t19zml	TD	lst_CT	NR	220
t17yyx	TD	lst_CT	NR	1028
t14zrc	TD	lst_CT	NR	696
5jhy	ASD	lst_CT	NR	34
t18lxz	TD	lst_CT	NR	248
t18lxz	TD	lst_CT	NR	832
t10wlq	TD	lst_CT	NR	880
4zhj	ASD	lst_CT	NR	540
a22cjr	ASD	lst_CT	NR	918
t6lcn	TD	lst_CT	NR	358
t7lzy	TD	lst_CT	NR	938
t10wlq	TD	lst_CT	NR	1112
a20xmy	ASD	lst_CT	NR	276
16lfx	ASD	lst_CT	NR	370
t15xrc	TD	lst_CT	NR	222
t18lxz	TD	lst_CT	NR	472
4tjsc	TD	lst_CT	NR	983
5tdxc	TD	lst_CT	NR	1099
4tjsc	TD	lst_CT	NR	1018
t10wlq	TD	lst_CT	NR	644
t19zml	TD	lst_CT	NR	190
t12wyg	TD	lst_CT	NR	514
t11lyy	TD	lst_CT	NR	272
t19zml	TD	lst_CT	NR	452
t9wyt	TD	lst_CT	NR	190
1qhy	ASD	lst_CT	NR	168
4zhj	ASD	lst_CT	NR	1100
a22cjr	ASD	lst_CT	NR	358
t19zml	TD	lst_CT	NR	580
t11lyy	TD	lst_CT	NR	484
t14zrc	TD	lst_CT	NR	1096
4tjsc	TD	lst_CT	NR	186
2tzxm	TD	lst_CT	NR	564
13cl	ASD	lst_CT	NR	54
5tdxc	TD	lst_CT	NR	390
a22cjr	ASD	lst_CT	NR	1091
t6lcn	TD	lst_CT	NR	220
a20xmy	ASD	lst_CT	NR	326
5tdxc	TD	lst_CT	NR	26
3ydc	ASD	lst_CT	NR	274
t8lth	TD	lst_CT	NR	890
5tdxc	TD	lst_CT	NR	1073
t14zrc	TD	lst_CT	NR	720
t16arl	TD	lst_CT	NR	334
5tdxc	TD	lst_CT	NR	492
a22cjr	ASD	lst_CT	NR	994
t18lxz	TD	lst_CT	NR	588
16lfx	ASD	lst_CT	NR	612
t6lcn	TD	lst_CT	NR	398
t8lth	TD	lst_CT	NR	1063
16lfx	ASD	lst_CT	NR	778
t18lxz	TD	lst_CT	NR	342
t14zrc	TD	lst_CT	NR	930
a22cjr	ASD	lst_CT	NR	1063
16lfx	ASD	lst_CT	NR	362
2zhc	ASD	lst_CT	NR	988
2tzxm	TD	lst_CT	NR	356
t15xrc	TD	lst_CT	NR	554
2zhc	ASD	lst_CT	NR	214
t16arl	TD	lst_CT	NR	1055
t15xrc	TD	lst_CT	NR	1042
5tdxc	TD	lst_CT	NR	816
a21hcy	ASD	lst_CT	NR	1040
t18lxz	TD	lst_CT	NR	534
t18lxz	TD	lst_CT	NR	50
11pp	ASD	lst_CT	NR	274
t18lxz	TD	lst_CT	NR	110
t18lxz	TD	lst_CT	NR	90
4zhj	ASD	lst_CT	NR	184
4zhj	ASD	lst_CT	NR	432
t14zrc	TD	lst_CT	NR	200
4zhj	ASD	lst_CT	NR	692
5tdxc	TD	lst_CT	NR	772
a22cjr	ASD	lst_CT	NR	1031
4zhj	ASD	lst_CT	NR	436
2zhc	ASD	lst_CT	NR	400
2tzxm	TD	lst_CT	NR	360
t15xrc	TD	lst_CT	NR	772
16lfx	ASD	lst_CT	NR	692
2tzxm	TD	lst_CT	NR	254
4tjsc	TD	lst_CT	NR	372
16lfx	ASD	lst_CT	NR	478
a21hcy	ASD	lst_CT	NR	170
4zhj	ASD	lst_CT	NR	342
t8lth	TD	lst_CT	NR	678
t18lxz	TD	lst_CT	NR	546
t14zrc	TD	lst_CT	NR	986
5tdxc	TD	lst_CT	NR	296
a22cjr	ASD	lst_CT	NR	396
5tdxc	TD	lst_CT	NR	544
2tzxm	TD	lst_CT	NR	596
4zhj	ASD	lst_CT	NR	772
4zhj	ASD	lst_CT	NR	622
t14zrc	TD	lst_CT	NR	602
2tzxm	TD	lst_CT	NR	502
t18lxz	TD	lst_CT	NR	496
5tdxc	TD	lst_CT	NR	294
t14zrc	TD	lst_CT	NR	808
t11lyy	TD	lst_CT	NR	204
16lfx	ASD	lst_CT	NR	747
t16arl	TD	lst_CT	NR	719
t14zrc	TD	lst_CT	NR	470
t14zrc	TD	lst_CT	NR	319
t18lxz	TD	lst_CT	NR	79
