# Supplementary material for: The Influence of Irrelevant Visual Distractors on Eye Movement Control in Chinese Children with Autism Spectrum Disorder: Evidence from the Remote Distractor Paradigm
Source: J Autism Dev Disord. 2019 Oct 31;50(2):500–12. doi: 10.1007/s10803-019-04271-y (PMC6994527; doi:10.1007/s10803-019-04271-y)
Supplement: Supplementary file 6 — Supplementary material 6 (CSV 56 kb) [file 10803_2019_4271_MOESM6_ESM.csv]

Participants	Distractor_position	Group	Saccade_latency(ms)
t10wlq	C	TD	80
t13xhy	ST	TD	97
t13xhy	ST	TD	98
t11lyy	ST	TD	102
t14zrc	ST	TD	103
2tzxm	ST	TD	105
2tzxm	ST	TD	106
t11lyy	ST	TD	106
t20llc	ST	TD	107
2tzxm	ST	TD	108
t13xhy	ST	TD	108
t14zrc	ST	TD	108
2tzxm	ST	TD	108
2tzxm	NR	TD	108
2tzxm	ST	TD	108
2tzxm	ST	TD	108
2tzxm	ST	TD	108
2tzxm	ST	TD	108
2tzxm	ST	TD	109
t10wlq	ST	TD	109
1tlhj	FAR	TD	109
2tzxm	ST	TD	109
t10wlq	ST	TD	109
t14zrc	NR	TD	109
2tzxm	ST	TD	109
2tzxm	ST	TD	110
2tzxm	ST	TD	110
t18lxz	ST	TD	110
2zhc	ST	ASD	111
2tzxm	ST	TD	111
2tzxm	ST	TD	112
t13xhy	ST	TD	112
1qhy	ST	ASD	112
t13xhy	ST	TD	112
t13xhy	ST	TD	112
2tzxm	FAR	TD	112
t14zrc	ST	TD	113
2tzxm	ST	TD	113
2tzxm	ST	TD	113
2tzxm	ST	TD	114
2tzxm	ST	TD	114
2tzxm	ST	TD	114
16lfx	ST	ASD	115
1tlhj	C	TD	115
t11lyy	ST	TD	115
t20llc	NR	TD	116
1tlhj	ST	TD	116
2tzxm	ST	TD	116
2tzxm	ST	TD	116
t20llc	ST	TD	116
t7lzy	C	TD	117
1tlhj	ST	TD	117
t20llc	ST	TD	117
2tzxm	NR	TD	117
2tzxm	ST	TD	117
2tzxm	C	TD	117
t11lyy	ST	TD	117
t11lyy	ST	TD	117
1tlhj	ST	TD	117
2tzxm	ST	TD	117
t20llc	FAR	TD	117
11pp	C	ASD	118
2tzxm	ST	TD	118
t14zrc	ST	TD	118
1tlhj	ST	TD	118
2tzxm	ST	TD	118
t10wlq	ST	TD	118
t11lyy	ST	TD	118
t10wlq	ST	TD	118
t10wlq	ST	TD	118
14my	ST	ASD	119
18wx	C	ASD	119
3ydc	NR	ASD	119
t11lyy	ST	TD	119
t13xhy	ST	TD	119
1tlhj	C	TD	119
t13xhy	ST	TD	119
2tzxm	FAR	TD	119
a22cjr	C	ASD	119
3ydc	ST	ASD	120
t10wlq	ST	TD	120
t11lyy	ST	TD	120
t11lyy	ST	TD	120
t13xhy	ST	TD	120
t14zrc	ST	TD	120
t9wyt	C	TD	120
1qhy	ST	ASD	120
3ydc	ST	ASD	120
a21hcy	ST	ASD	120
14my	ST	ASD	121
2tzxm	ST	TD	121
2tzxm	ST	TD	121
t20llc	ST	TD	121
2zhc	ST	ASD	121
a22cjr	ST	ASD	121
t14zrc	ST	TD	121
t7lzy	C	TD	121
t9wyt	ST	TD	121
17xx	ST	ASD	122
3ydc	ST	ASD	122
2tzxm	FAR	TD	122
2tzxm	C	TD	122
t14zrc	ST	TD	122
t14zrc	ST	TD	122
t10wlq	ST	TD	123
t14zrc	ST	TD	123
t18lxz	ST	TD	123
1tlhj	ST	TD	123
1tlhj	ST	TD	123
1tlhj	ST	TD	123
t11lyy	ST	TD	123
3ydc	ST	ASD	123
t7lzy	ST	TD	123
t9wyt	C	TD	123
t7lzy	ST	TD	123
15yy	ST	ASD	124
2tzxm	C	TD	124
t13xhy	ST	TD	124
t20llc	ST	TD	124
t10wlq	ST	TD	124
t13xhy	ST	TD	124
3ydc	ST	ASD	124
t18lxz	FAR	TD	124
1tlhj	ST	TD	124
1tlhj	ST	TD	124
15yy	ST	ASD	125
15yy	ST	ASD	125
5jhy	ST	ASD	125
t14zrc	ST	TD	125
t9wyt	ST	TD	125
t14zrc	ST	TD	125
t20llc	NR	TD	125
t16arl	ST	TD	125
14my	ST	ASD	126
4zhj	ST	ASD	126
t11lyy	ST	TD	126
1tlhj	ST	TD	126
1tlhj	C	TD	126
1tlhj	ST	TD	126
t11lyy	ST	TD	126
t14zrc	ST	TD	126
15yy	ST	ASD	126
5jhy	ST	ASD	126
2tzxm	ST	TD	126
t10wlq	ST	TD	126
t11lyy	ST	TD	126
11pp	FAR	ASD	127
t7lzy	ST	TD	127
1tlhj	ST	TD	127
1tlhj	NR	TD	127
11pp	FAR	ASD	127
11pp	ST	ASD	127
a20xmy	NR	ASD	127
t10wlq	ST	TD	127
t9wyt	ST	TD	127
t10wlq	ST	TD	127
t18lxz	ST	TD	127
t8lth	ST	TD	127
t9wyt	ST	TD	127
14my	ST	ASD	128
3ydc	NR	ASD	128
3ydc	ST	ASD	128
3ydc	ST	ASD	128
5jhy	ST	ASD	128
t13xhy	NR	TD	128
2tzxm	ST	TD	128
t14zrc	ST	TD	128
3ydc	ST	ASD	128
3ydc	ST	ASD	128
t11lyy	ST	TD	128
t11lyy	ST	TD	128
t13xhy	ST	TD	128
t8lth	FAR	TD	128
t11lyy	ST	TD	128
2tzxm	C	TD	129
1tlhj	FAR	TD	129
1tlhj	ST	TD	129
t10wlq	ST	TD	129
t15xrc	NR	TD	129
t20llc	C	TD	129
15yy	ST	ASD	129
t10wlq	ST	TD	129
a22cjr	ST	ASD	129
t9wyt	NR	TD	129
14my	ST	ASD	130
15yy	ST	ASD	130
2zhc	ST	ASD	130
2tzxm	NR	TD	130
1tlhj	ST	TD	130
1tlhj	C	TD	130
5tdxc	ST	TD	130
16lfx	ST	ASD	130
2zhc	C	ASD	130
t15xrc	ST	TD	130
17xx	ST	ASD	131
4zhj	ST	ASD	131
t10wlq	ST	TD	131
t11lyy	ST	TD	131
t14zrc	C	TD	131
15yy	ST	ASD	131
18wx	ST	ASD	131
3ydc	ST	ASD	131
3ydc	ST	ASD	131
1tlhj	FAR	TD	131
t9wyt	ST	TD	131
14my	NR	ASD	132
17xx	ST	ASD	132
2tzxm	ST	TD	132
2tzxm	C	TD	132
t10wlq	ST	TD	132
t11lyy	ST	TD	132
t20llc	ST	TD	132
t7lzy	ST	TD	132
t9wyt	ST	TD	132
1tlhj	ST	TD	132
1tlhj	ST	TD	132
15yy	ST	ASD	132
6zxy	ST	ASD	132
t10wlq	ST	TD	132
t8lth	ST	TD	132
15yy	ST	ASD	133
1tlhj	ST	TD	133
5tdxc	ST	TD	133
4tjsc	ST	TD	133
t7lzy	ST	TD	133
4tjsc	ST	TD	133
16lfx	ST	ASD	134
18wx	ST	ASD	134
3ydc	ST	ASD	134
5jhy	ST	ASD	134
t17yyx	ST	TD	134
t7lzy	ST	TD	134
t9wyt	ST	TD	134
1tlhj	C	TD	134
t10wlq	ST	TD	134
t13xhy	ST	TD	134
t9wyt	FAR	TD	134
t9wyt	ST	TD	134
11pp	ST	ASD	134
15yy	ST	ASD	134
5jhy	ST	ASD	134
t16arl	ST	TD	134
t13xhy	ST	TD	134
5tdxc	ST	TD	134
17xx	FAR	ASD	135
5jhy	FAR	ASD	135
t11lyy	ST	TD	135
t20llc	ST	TD	135
1tlhj	ST	TD	135
t13xhy	ST	TD	135
t7lzy	ST	TD	135
15yy	ST	ASD	135
2tzxm	ST	TD	135
t16arl	ST	TD	135
t8lth	ST	TD	135
t17yyx	ST	TD	135
t17yyx	ST	TD	135
t7lzy	ST	TD	135
14my	C	ASD	136
15yy	ST	ASD	136
16lfx	ST	ASD	136
t13xhy	ST	TD	136
t13xhy	FAR	TD	136
t13xhy	ST	TD	136
t16arl	ST	TD	136
14my	ST	ASD	136
1qhy	ST	ASD	136
t10wlq	ST	TD	136
a21hcy	ST	ASD	136
t8lth	ST	TD	136
t16arl	ST	TD	136
6zxy	ST	ASD	137
t10wlq	C	TD	137
t17yyx	ST	TD	137
t20llc	ST	TD	137
t9wyt	ST	TD	137
11pp	ST	ASD	137
2zhc	ST	ASD	137
t15xrc	ST	TD	137
t16arl	ST	TD	137
t17yyx	ST	TD	137
4tjsc	ST	TD	137
t16arl	ST	TD	137
t7lzy	ST	TD	137
t9wyt	ST	TD	137
11pp	ST	ASD	138
t15xrc	ST	TD	138
11pp	ST	ASD	138
t10wlq	ST	TD	138
t17yyx	ST	TD	138
t20llc	ST	TD	138
t9wyt	ST	TD	138
13cl	ST	ASD	139
17xx	ST	ASD	139
5jhy	ST	ASD	139
2tzxm	NR	TD	139
t9wyt	ST	TD	139
t9wyt	ST	TD	139
t14zrc	ST	TD	139
t8lth	ST	TD	139
a21hcy	ST	ASD	139
14my	ST	ASD	140
t14zrc	ST	TD	140
t18lxz	ST	TD	140
t19zml	ST	TD	140
4tjsc	ST	TD	140
t13xhy	NR	TD	140
14my	ST	ASD	140
18wx	ST	ASD	140
t10wlq	ST	TD	140
a22cjr	ST	ASD	140
t9wyt	NR	TD	140
1qhy	ST	ASD	141
4zhj	ST	ASD	141
t13xhy	ST	TD	141
1tlhj	ST	TD	141
t11lyy	ST	TD	141
t13xhy	ST	TD	141
t14zrc	ST	TD	141
4tjsc	ST	TD	141
a22cjr	ST	ASD	141
t8lth	NR	TD	141
t16arl	ST	TD	141
17xx	ST	ASD	142
1qhy	C	ASD	142
3ydc	ST	ASD	142
5jhy	ST	ASD	142
6zxy	ST	ASD	142
t12wyg	ST	TD	142
t13xhy	ST	TD	142
1tlhj	NR	TD	142
4tjsc	C	TD	142
t13xhy	ST	TD	142
t16arl	ST	TD	142
t7lzy	ST	TD	142
t7lzy	ST	TD	142
1qhy	ST	ASD	143
t14zrc	ST	TD	143
t19zml	ST	TD	143
t7lzy	ST	TD	143
t11lyy	ST	TD	143
t13xhy	ST	TD	143
16lfx	ST	ASD	143
1qhy	ST	ASD	143
5tdxc	ST	TD	143
a22cjr	ST	ASD	143
t13xhy	ST	TD	143
t17yyx	ST	TD	143
t9wyt	ST	TD	143
1tlhj	ST	TD	143
t10wlq	ST	TD	143
t13xhy	ST	TD	143
17xx	ST	ASD	144
17xx	ST	ASD	144
4tjsc	ST	TD	144
a22cjr	ST	ASD	144
t13xhy	ST	TD	144
t10wlq	ST	TD	144
t17yyx	ST	TD	144
t7lzy	ST	TD	144
t7lzy	ST	TD	144
t9wyt	ST	TD	144
5tdxc	ST	TD	144
1qhy	FAR	ASD	144
1qhy	ST	ASD	144
t16arl	ST	TD	144
t17yyx	ST	TD	144
t18lxz	ST	TD	144
14my	NR	ASD	145
15yy	ST	ASD	145
17xx	ST	ASD	145
5jhy	ST	ASD	145
t11lyy	ST	TD	145
t11lyy	ST	TD	145
t13xhy	C	TD	145
t13xhy	NR	TD	145
t19zml	ST	TD	145
3ydc	ST	ASD	145
4tjsc	ST	TD	145
4tjsc	ST	TD	145
4tjsc	ST	TD	145
11pp	ST	ASD	146
14my	ST	ASD	146
17xx	ST	ASD	146
17xx	NR	ASD	146
3ydc	ST	ASD	146
6zxy	ST	ASD	146
2tzxm	C	TD	146
2tzxm	ST	TD	146
t20llc	ST	TD	146
4tjsc	ST	TD	146
t12wyg	ST	TD	146
11pp	ST	ASD	146
t13xhy	ST	TD	146
t17yyx	ST	TD	146
t8lth	ST	TD	146
14my	FAR	ASD	147
14my	ST	ASD	147
17xx	ST	ASD	147
3ydc	ST	ASD	147
5jhy	ST	ASD	147
t20llc	NR	TD	147
5tdxc	C	TD	147
15yy	C	ASD	147
17xx	ST	ASD	147
18wx	ST	ASD	147
4tjsc	NR	TD	147
t17yyx	ST	TD	147
t18lxz	ST	TD	147
t7lzy	ST	TD	147
11pp	ST	ASD	148
6zxy	ST	ASD	148
t19zml	ST	TD	148
a22cjr	FAR	ASD	148
a22cjr	ST	ASD	148
t11lyy	NR	TD	148
t17yyx	ST	TD	148
t20llc	ST	TD	148
t8lth	NR	TD	148
1tlhj	ST	TD	148
t6lcn	ST	TD	148
t7lzy	C	TD	148
15yy	ST	ASD	149
1qhy	ST	ASD	149
6zxy	ST	ASD	149
t13xhy	C	TD	149
t17yyx	ST	TD	149
t7lzy	ST	TD	149
1qhy	ST	ASD	149
t15xrc	C	TD	149
t8lth	ST	TD	149
14my	ST	ASD	150
17xx	ST	ASD	150
1qhy	ST	ASD	150
5jhy	FAR	ASD	150
6zxy	ST	ASD	150
5tdxc	ST	TD	150
t17yyx	ST	TD	150
t20llc	C	TD	150
t15xrc	ST	TD	150
t19zml	ST	TD	150
14my	ST	ASD	150
3ydc	NR	ASD	150
t16arl	ST	TD	150
t17yyx	ST	TD	150
t17yyx	ST	TD	150
1tlhj	ST	TD	150
t13xhy	ST	TD	150
t15xrc	ST	TD	150
t20llc	C	TD	150
11pp	ST	ASD	151
14my	NR	ASD	151
2tzxm	FAR	TD	151
5tdxc	ST	TD	151
t13xhy	NR	TD	151
t20llc	FAR	TD	151
11pp	ST	ASD	151
18wx	ST	ASD	151
4tjsc	ST	TD	151
14my	NR	ASD	152
1qhy	C	ASD	152
1qhy	C	ASD	152
1qhy	ST	ASD	152
2tzxm	ST	TD	152
t13xhy	C	TD	152
t15xrc	ST	TD	152
t8lth	ST	TD	152
1tlhj	ST	TD	152
1tlhj	FAR	TD	152
t13xhy	ST	TD	152
t7lzy	C	TD	152
17xx	ST	ASD	152
3ydc	ST	ASD	152
t17yyx	NR	TD	152
1tlhj	C	TD	152
t16arl	ST	TD	152
t17yyx	ST	TD	152
11pp	ST	ASD	153
1qhy	C	ASD	153
1qhy	ST	ASD	153
4tjsc	ST	TD	153
a22cjr	ST	ASD	153
t8lth	ST	TD	153
t11lyy	NR	TD	153
14my	ST	ASD	153
2zhc	ST	ASD	153
3ydc	NR	ASD	153
3ydc	ST	ASD	153
t17yyx	ST	TD	153
t7lzy	ST	TD	153
t18lxz	ST	TD	153
5tdxc	ST	TD	153
14my	ST	ASD	154
1tlhj	C	TD	154
t11lyy	ST	TD	154
t13xhy	FAR	TD	154
17xx	ST	ASD	154
1qhy	ST	ASD	154
4tjsc	FAR	TD	154
1tlhj	ST	TD	154
t15xrc	ST	TD	154
t17yyx	ST	TD	154
t7lzy	ST	TD	154
18wx	ST	ASD	155
1qhy	FAR	ASD	155
1tlhj	C	TD	155
a20xmy	FAR	ASD	155
t17yyx	ST	TD	155
t18lxz	ST	TD	155
t19zml	ST	TD	155
17xx	ST	ASD	155
3ydc	FAR	ASD	155
3ydc	ST	ASD	155
t11lyy	ST	TD	155
t17yyx	FAR	TD	155
4tjsc	ST	TD	155
17xx	FAR	ASD	156
17xx	ST	ASD	156
3ydc	NR	ASD	156
t10wlq	FAR	TD	156
t13xhy	C	TD	156
t9wyt	ST	TD	156
11pp	ST	ASD	156
3ydc	ST	ASD	156
3ydc	ST	ASD	156
4tjsc	ST	TD	156
t13xhy	ST	TD	156
11pp	ST	ASD	157
11pp	ST	ASD	157
17xx	ST	ASD	157
t12wyg	ST	TD	157
t17yyx	ST	TD	157
t17yyx	ST	TD	157
t7lzy	ST	TD	157
t10wlq	NR	TD	157
t10wlq	C	TD	157
t16arl	ST	TD	157
t12wyg	ST	TD	157
t17yyx	C	TD	157
t17yyx	NR	TD	157
t15xrc	ST	TD	157
t15xrc	C	TD	157
15yy	FAR	ASD	158
17xx	ST	ASD	158
18wx	NR	ASD	158
1qhy	FAR	ASD	158
t10wlq	ST	TD	158
t13xhy	ST	TD	158
t19zml	ST	TD	158
2tzxm	ST	TD	158
t13xhy	C	TD	158
t16arl	ST	TD	158
t18lxz	FAR	TD	158
4tjsc	ST	TD	158
t13xhy	ST	TD	158
t8lth	NR	TD	158
t9wyt	NR	TD	158
14my	NR	ASD	159
t13xhy	ST	TD	159
t19zml	ST	TD	159
a21hcy	ST	ASD	159
t9wyt	NR	TD	159
2zhc	ST	ASD	159
3ydc	ST	ASD	159
5jhy	ST	ASD	159
t10wlq	ST	TD	159
t13xhy	C	TD	159
t18lxz	C	TD	159
t8lth	ST	TD	159
t8lth	NR	TD	159
a21hcy	ST	ASD	159
t14zrc	ST	TD	159
14my	NR	ASD	160
18wx	FAR	ASD	160
3ydc	FAR	ASD	160
t11lyy	ST	TD	160
t16arl	ST	TD	160
t7lzy	ST	TD	160
1tlhj	ST	TD	160
t17yyx	ST	TD	160
t8lth	ST	TD	160
6zxy	ST	ASD	160
t11lyy	ST	TD	160
t15xrc	ST	TD	160
t17yyx	ST	TD	160
t18lxz	ST	TD	160
13cl	ST	ASD	161
17xx	ST	ASD	161
t20llc	C	TD	161
t10wlq	ST	TD	161
t13xhy	NR	TD	161
t19zml	ST	TD	161
t7lzy	ST	TD	161
11pp	ST	ASD	161
15yy	ST	ASD	161
1qhy	ST	ASD	161
5jhy	ST	ASD	161
t12wyg	ST	TD	161
t12wyg	FAR	TD	161
t13xhy	C	TD	161
t15xrc	C	TD	161
t7lzy	ST	TD	161
t7lzy	ST	TD	161
t7lzy	ST	TD	161
t12wyg	ST	TD	161
t13xhy	ST	TD	161
t17yyx	C	TD	161
t19zml	ST	TD	161
t7lzy	NR	TD	161
t8lth	ST	TD	161
6zxy	ST	ASD	162
t13xhy	C	TD	162
t18lxz	ST	TD	162
t8lth	ST	TD	162
1tlhj	NR	TD	162
t13xhy	C	TD	162
t19zml	C	TD	162
17xx	ST	ASD	162
t11lyy	ST	TD	162
t15xrc	NR	TD	162
t10wlq	NR	TD	162
t12wyg	ST	TD	162
t18lxz	ST	TD	162
14my	FAR	ASD	163
18wx	ST	ASD	163
5jhy	ST	ASD	163
6zxy	ST	ASD	163
2tzxm	FAR	TD	163
4tjsc	ST	TD	163
t7lzy	FAR	TD	163
t8lth	FAR	TD	163
1tlhj	C	TD	163
11pp	FAR	ASD	163
1qhy	NR	ASD	163
4tjsc	ST	TD	163
t12wyg	ST	TD	163
t13xhy	ST	TD	163
t15xrc	ST	TD	163
t17yyx	NR	TD	163
t17yyx	ST	TD	163
t17yyx	ST	TD	163
t8lth	ST	TD	163
t11lyy	ST	TD	163
t11lyy	ST	TD	163
t17yyx	C	TD	163
t17yyx	ST	TD	163
13cl	NR	ASD	164
15yy	ST	ASD	164
18wx	ST	ASD	164
t17yyx	ST	TD	164
t7lzy	FAR	TD	164
t8lth	ST	TD	164
1tlhj	ST	TD	164
t15xrc	ST	TD	164
t20llc	C	TD	164
t8lth	ST	TD	164
14my	ST	ASD	164
4tjsc	ST	TD	164
t11lyy	ST	TD	164
t17yyx	ST	TD	164
t6lcn	ST	TD	164
t8lth	ST	TD	164
13cl	ST	ASD	165
13cl	ST	ASD	165
17xx	ST	ASD	165
5tdxc	ST	TD	165
t8lth	ST	TD	165
5tdxc	ST	TD	165
13cl	ST	ASD	165
1qhy	ST	ASD	165
5jhy	ST	ASD	165
a20xmy	ST	ASD	165
t17yyx	FAR	TD	165
t6lcn	ST	TD	165
t17yyx	FAR	TD	165
t6lcn	ST	TD	165
17xx	NR	ASD	166
17xx	ST	ASD	166
6zxy	ST	ASD	166
t18lxz	ST	TD	166
t9wyt	ST	TD	166
14my	ST	ASD	166
14my	ST	ASD	166
3ydc	NR	ASD	166
4zhj	ST	ASD	166
6zxy	ST	ASD	166
t12wyg	ST	TD	166
t13xhy	C	TD	166
t15xrc	NR	TD	166
2zhc	ST	ASD	167
3ydc	ST	ASD	167
5jhy	C	ASD	167
t11lyy	NR	TD	167
t12wyg	ST	TD	167
t14zrc	ST	TD	167
t15xrc	ST	TD	167
t16arl	ST	TD	167
t7lzy	NR	TD	167
t7lzy	C	TD	167
t19zml	ST	TD	167
2zhc	ST	ASD	167
3ydc	C	ASD	167
a22cjr	ST	ASD	167
t6lcn	ST	TD	167
t17yyx	C	TD	167
t18lxz	FAR	TD	167
t6lcn	ST	TD	167
17xx	FAR	ASD	168
t10wlq	C	TD	168
t17yyx	ST	TD	168
t7lzy	ST	TD	168
1qhy	ST	ASD	168
5jhy	ST	ASD	168
a20xmy	ST	ASD	168
t17yyx	C	TD	168
t17yyx	C	TD	168
a22cjr	ST	ASD	168
17xx	NR	ASD	169
t19zml	ST	TD	169
t7lzy	C	TD	169
t9wyt	ST	TD	169
t9wyt	ST	TD	169
1tlhj	NR	TD	169
t13xhy	C	TD	169
t17yyx	ST	TD	169
4tjsc	ST	TD	169
t20llc	ST	TD	169
t7lzy	ST	TD	169
t7lzy	FAR	TD	169
t7lzy	C	TD	169
t9wyt	NR	TD	169
t11lyy	C	TD	169
t13xhy	ST	TD	169
t6lcn	ST	TD	169
t8lth	ST	TD	169
t9wyt	ST	TD	169
14my	NR	ASD	170
2tzxm	FAR	TD	170
4tjsc	ST	TD	170
t13xhy	C	TD	170
t17yyx	ST	TD	170
t18lxz	ST	TD	170
t9wyt	ST	TD	170
t11lyy	ST	TD	170
14my	FAR	ASD	170
t7lzy	C	TD	170
4tjsc	ST	TD	170
t7lzy	ST	TD	170
t7lzy	ST	TD	171
t9wyt	ST	TD	171
1tlhj	FAR	TD	171
t12wyg	ST	TD	171
6zxy	NR	ASD	171
t14zrc	FAR	TD	171
t12wyg	FAR	TD	171
t13xhy	ST	TD	171
t20llc	FAR	TD	171
13cl	ST	ASD	172
14my	NR	ASD	172
16lfx	FAR	ASD	172
1qhy	ST	ASD	172
t12wyg	ST	TD	172
t19zml	ST	TD	172
a21hcy	ST	ASD	172
2tzxm	ST	TD	172
t10wlq	FAR	TD	172
t13xhy	C	TD	172
t19zml	ST	TD	172
3ydc	FAR	ASD	172
6zxy	ST	ASD	172
t11lyy	C	TD	172
t12wyg	ST	TD	172
t13xhy	C	TD	172
t16arl	ST	TD	172
t20llc	ST	TD	172
t7lzy	C	TD	172
4tjsc	ST	TD	172
t16arl	ST	TD	172
13cl	ST	ASD	173
18wx	ST	ASD	173
1qhy	ST	ASD	173
2zhc	ST	ASD	173
1tlhj	FAR	TD	173
4tjsc	ST	TD	173
t13xhy	C	TD	173
17xx	ST	ASD	173
4tjsc	ST	TD	173
t11lyy	ST	TD	173
t15xrc	ST	TD	173
t17yyx	FAR	TD	173
t16arl	ST	TD	173
t17yyx	C	TD	173
t6lcn	ST	TD	173
t8lth	ST	TD	173
11pp	FAR	ASD	174
17xx	FAR	ASD	174
a21hcy	ST	ASD	174
a21hcy	ST	ASD	174
14my	ST	ASD	174
14my	FAR	ASD	174
6zxy	ST	ASD	174
4tjsc	NR	TD	174
4tjsc	FAR	TD	174
t12wyg	ST	TD	174
t15xrc	ST	TD	174
t15xrc	NR	TD	174
t17yyx	C	TD	174
t18lxz	ST	TD	174
t6lcn	ST	TD	174
t10wlq	C	TD	174
t11lyy	C	TD	174
t6lcn	ST	TD	174
t8lth	ST	TD	174
14my	ST	ASD	175
17xx	FAR	ASD	175
17xx	FAR	ASD	175
17xx	ST	ASD	175
6zxy	ST	ASD	175
t12wyg	ST	TD	175
t10wlq	ST	TD	175
t10wlq	ST	TD	175
t7lzy	NR	TD	175
t8lth	ST	TD	175
13cl	ST	ASD	175
14my	NR	ASD	175
14my	ST	ASD	175
14my	ST	ASD	175
14my	ST	ASD	175
18wx	FAR	ASD	175
3ydc	ST	ASD	175
4tjsc	C	TD	175
t12wyg	FAR	TD	175
t18lxz	ST	TD	175
t8lth	C	TD	175
14my	ST	ASD	176
16lfx	ST	ASD	176
16lfx	ST	ASD	176
5jhy	NR	ASD	176
5jhy	ST	ASD	176
t10wlq	ST	TD	176
t10wlq	C	TD	176
t11lyy	C	TD	176
t12wyg	ST	TD	176
t19zml	ST	TD	176
t7lzy	ST	TD	176
14my	C	ASD	176
15yy	ST	ASD	176
18wx	C	ASD	176
t13xhy	NR	TD	176
t15xrc	ST	TD	176
t17yyx	NR	TD	176
t9wyt	NR	TD	176
1tlhj	ST	TD	176
t12wyg	ST	TD	176
17xx	ST	ASD	177
2zhc	ST	ASD	177
2zhc	ST	ASD	177
t12wyg	ST	TD	177
t6lcn	ST	TD	177
t7lzy	ST	TD	177
t12wyg	ST	TD	177
14my	FAR	ASD	177
1tlhj	ST	TD	177
t11lyy	ST	TD	177
t12wyg	ST	TD	177
t14zrc	ST	TD	177
t17yyx	ST	TD	177
t7lzy	FAR	TD	177
15yy	ST	ASD	178
16lfx	ST	ASD	178
1tlhj	NR	TD	178
t15xrc	C	TD	178
t17yyx	ST	TD	178
t18lxz	ST	TD	178
13cl	ST	ASD	178
5jhy	ST	ASD	178
6zxy	ST	ASD	178
4tjsc	C	TD	178
t7lzy	NR	TD	178
1tlhj	FAR	TD	178
t17yyx	FAR	TD	178
t9wyt	ST	TD	178
11pp	NR	ASD	179
3ydc	ST	ASD	179
6zxy	ST	ASD	179
t10wlq	ST	TD	179
t12wyg	ST	TD	179
t8lth	ST	TD	179
a20xmy	ST	ASD	179
a21hcy	ST	ASD	179
t10wlq	ST	TD	179
14my	ST	ASD	179
18wx	ST	ASD	179
t8lth	ST	TD	179
1tlhj	ST	TD	179
a22cjr	ST	ASD	179
t10wlq	C	TD	179
14my	ST	ASD	180
5jhy	FAR	ASD	180
6zxy	ST	ASD	180
t17yyx	ST	TD	180
a21hcy	ST	ASD	180
t12wyg	ST	TD	180
t13xhy	C	TD	180
t13xhy	C	TD	180
6zxy	ST	ASD	180
a22cjr	ST	ASD	180
t12wyg	ST	TD	180
4tjsc	C	TD	180
t11lyy	NR	TD	180
t12wyg	ST	TD	180
t12wyg	C	TD	180
t13xhy	ST	TD	180
t14zrc	ST	TD	180
t7lzy	ST	TD	180
16lfx	ST	ASD	181
18wx	ST	ASD	181
1qhy	C	ASD	181
5jhy	FAR	ASD	181
4tjsc	FAR	TD	181
a20xmy	ST	ASD	181
t10wlq	ST	TD	181
t14zrc	C	TD	181
15yy	FAR	ASD	181
16lfx	ST	ASD	181
2zhc	FAR	ASD	181
5jhy	ST	ASD	181
6zxy	ST	ASD	181
4tjsc	C	TD	181
a20xmy	ST	ASD	181
t11lyy	FAR	TD	181
t16arl	FAR	TD	181
t17yyx	FAR	TD	181
t16arl	ST	TD	181
17xx	C	ASD	182
3ydc	ST	ASD	182
t12wyg	ST	TD	182
t15xrc	ST	TD	182
t7lzy	C	TD	182
4tjsc	NR	TD	182
a21hcy	ST	ASD	182
t15xrc	ST	TD	182
t16arl	ST	TD	182
t19zml	ST	TD	182
t20llc	ST	TD	182
14my	ST	ASD	182
15yy	FAR	ASD	182
15yy	NR	ASD	182
16lfx	ST	ASD	182
2zhc	FAR	ASD	182
4tjsc	ST	TD	182
t11lyy	FAR	TD	182
t12wyg	C	TD	182
a21hcy	ST	ASD	182
t8lth	C	TD	182
a22cjr	ST	ASD	182
t10wlq	ST	TD	182
t14zrc	ST	TD	182
16lfx	ST	ASD	183
17xx	ST	ASD	183
1qhy	NR	ASD	183
2zhc	ST	ASD	183
t19zml	ST	TD	183
1tlhj	NR	TD	183
a20xmy	FAR	ASD	183
t10wlq	ST	TD	183
t12wyg	ST	TD	183
t13xhy	C	TD	183
13cl	ST	ASD	183
2zhc	FAR	ASD	183
5jhy	ST	ASD	183
t12wyg	C	TD	183
t13xhy	C	TD	183
t16arl	NR	TD	183
t17yyx	C	TD	183
1tlhj	FAR	TD	183
4tjsc	ST	TD	183
t14zrc	ST	TD	183
t16arl	ST	TD	183
t17yyx	NR	TD	183
t9wyt	ST	TD	183
11pp	ST	ASD	184
17xx	ST	ASD	184
5jhy	NR	ASD	184
t18lxz	ST	TD	184
17xx	ST	ASD	184
18wx	FAR	ASD	184
4zhj	ST	ASD	184
a22cjr	ST	ASD	184
t12wyg	ST	TD	184
t15xrc	NR	TD	184
t17yyx	C	TD	184
t17yyx	C	TD	184
1tlhj	NR	TD	184
t13xhy	ST	TD	184
t9wyt	NR	TD	184
t13xhy	C	TD	185
t15xrc	ST	TD	185
t19zml	ST	TD	185
t11lyy	C	TD	185
t15xrc	ST	TD	185
14my	NR	ASD	185
15yy	C	ASD	185
17xx	ST	ASD	185
3ydc	FAR	ASD	185
3ydc	ST	ASD	185
6zxy	ST	ASD	185
t12wyg	ST	TD	185
t15xrc	ST	TD	185
t18lxz	ST	TD	185
4tjsc	ST	TD	185
t11lyy	NR	TD	185
t20llc	ST	TD	185
t7lzy	C	TD	185
13cl	FAR	ASD	186
16lfx	ST	ASD	186
16lfx	ST	ASD	186
17xx	C	ASD	186
2zhc	ST	ASD	186
4zhj	ST	ASD	186
4tjsc	ST	TD	186
5tdxc	ST	TD	186
t15xrc	ST	TD	186
a22cjr	ST	ASD	186
t16arl	ST	TD	186
t16arl	ST	TD	186
t17yyx	ST	TD	186
t9wyt	ST	TD	186
15yy	C	ASD	186
6zxy	ST	ASD	186
t17yyx	NR	TD	186
t20llc	C	TD	186
a20xmy	ST	ASD	186
t10wlq	ST	TD	186
t12wyg	ST	TD	186
t13xhy	C	TD	186
t20llc	C	TD	186
14my	ST	ASD	187
14my	NR	ASD	187
15yy	C	ASD	187
15yy	NR	ASD	187
16lfx	ST	ASD	187
17xx	NR	ASD	187
1qhy	ST	ASD	187
6zxy	ST	ASD	187
a20xmy	ST	ASD	187
t16arl	ST	TD	187
t18lxz	ST	TD	187
t19zml	ST	TD	187
17xx	ST	ASD	187
17xx	ST	ASD	187
17xx	ST	ASD	187
1qhy	C	ASD	187
4tjsc	ST	TD	187
a22cjr	ST	ASD	187
t14zrc	NR	TD	187
t17yyx	ST	TD	187
t9wyt	C	TD	187
16lfx	FAR	ASD	188
a20xmy	FAR	ASD	188
t10wlq	C	TD	188
t12wyg	FAR	TD	188
t12wyg	ST	TD	188
t12wyg	ST	TD	188
14my	ST	ASD	188
2zhc	C	ASD	188
3ydc	ST	ASD	188
t12wyg	ST	TD	188
t12wyg	C	TD	188
a21hcy	ST	ASD	188
t12wyg	ST	TD	188
t7lzy	ST	TD	188
11pp	ST	ASD	189
2tzxm	C	TD	189
t16arl	ST	TD	189
t18lxz	ST	TD	189
2tzxm	ST	TD	189
t14zrc	ST	TD	189
t15xrc	ST	TD	189
t19zml	NR	TD	189
t8lth	ST	TD	189
14my	C	ASD	189
15yy	ST	ASD	189
16lfx	ST	ASD	189
5jhy	ST	ASD	189
t19zml	ST	TD	189
t8lth	C	TD	189
t11lyy	FAR	TD	189
11pp	C	ASD	190
5jhy	NR	ASD	190
5jhy	NR	ASD	190
5jhy	ST	ASD	190
2tzxm	C	TD	190
t15xrc	ST	TD	190
2tzxm	C	TD	190
t10wlq	C	TD	190
t8lth	ST	TD	190
15yy	ST	ASD	190
16lfx	ST	ASD	190
16lfx	ST	ASD	190
2zhc	ST	ASD	190
3ydc	ST	ASD	190
t12wyg	NR	TD	190
t13xhy	C	TD	190
t17yyx	NR	TD	190
t8lth	ST	TD	190
t9wyt	C	TD	190
t9wyt	ST	TD	190
a21hcy	ST	ASD	190
t11lyy	C	TD	190
t12wyg	NR	TD	190
t15xrc	ST	TD	190
t20llc	NR	TD	190
16lfx	ST	ASD	191
2tzxm	C	TD	191
t10wlq	ST	TD	191
t12wyg	C	TD	191
t17yyx	C	TD	191
t18lxz	ST	TD	191
t18lxz	ST	TD	191
t6lcn	ST	TD	191
t9wyt	ST	TD	191
1tlhj	C	TD	191
t12wyg	C	TD	191
11pp	ST	ASD	191
17xx	ST	ASD	191
2zhc	NR	ASD	191
2zhc	ST	ASD	191
3ydc	C	ASD	191
5jhy	ST	ASD	191
4tjsc	C	TD	191
t12wyg	C	TD	191
t8lth	C	TD	191
t9wyt	ST	TD	191
a22cjr	ST	ASD	191
t13xhy	ST	TD	191
16lfx	FAR	ASD	192
6zxy	C	ASD	192
t13xhy	C	TD	192
1tlhj	NR	TD	192
a20xmy	ST	ASD	192
t11lyy	C	TD	192
17xx	ST	ASD	192
18wx	ST	ASD	192
2zhc	FAR	ASD	192
2zhc	ST	ASD	192
3ydc	C	ASD	192
5jhy	ST	ASD	192
6zxy	ST	ASD	192
t14zrc	ST	TD	192
t14zrc	ST	TD	192
t20llc	FAR	TD	192
t7lzy	NR	TD	192
a21hcy	ST	ASD	192
t10wlq	ST	TD	192
t11lyy	FAR	TD	192
2zhc	ST	ASD	193
5jhy	C	ASD	193
4tjsc	FAR	TD	193
2tzxm	C	TD	193
t12wyg	ST	TD	193
t18lxz	ST	TD	193
15yy	C	ASD	193
15yy	FAR	ASD	193
3ydc	C	ASD	193
a20xmy	ST	ASD	193
t13xhy	ST	TD	193
t15xrc	ST	TD	193
a21hcy	ST	ASD	193
t6lcn	ST	TD	193
t7lzy	C	TD	193
t8lth	ST	TD	193
t10wlq	C	TD	193
t11lyy	FAR	TD	193
t12wyg	ST	TD	193
t20llc	ST	TD	193
13cl	ST	ASD	194
15yy	NR	ASD	194
16lfx	FAR	ASD	194
5jhy	C	ASD	194
a22cjr	ST	ASD	194
t13xhy	C	TD	194
a22cjr	ST	ASD	194
t12wyg	ST	TD	194
t15xrc	ST	TD	194
t7lzy	FAR	TD	194
14my	ST	ASD	194
t13xhy	C	TD	194
t7lzy	FAR	TD	194
t9wyt	C	TD	194
a21hcy	ST	ASD	194
t12wyg	ST	TD	194
t17yyx	FAR	TD	194
t17yyx	ST	TD	194
5tdxc	ST	TD	194
15yy	ST	ASD	195
16lfx	ST	ASD	195
4zhj	ST	ASD	195
t16arl	ST	TD	195
a21hcy	FAR	ASD	195
t7lzy	ST	TD	195
4tjsc	ST	TD	195
t11lyy	C	TD	195
t15xrc	ST	TD	195
t7lzy	FAR	TD	195
t9wyt	C	TD	195
13cl	ST	ASD	195
15yy	NR	ASD	195
18wx	NR	ASD	195
1qhy	NR	ASD	195
t10wlq	ST	TD	195
t8lth	C	TD	195
t9wyt	ST	TD	195
a20xmy	ST	ASD	195
t10wlq	C	TD	195
t16arl	FAR	TD	195
t20llc	ST	TD	195
t20llc	NR	TD	195
14my	C	ASD	196
15yy	NR	ASD	196
6zxy	C	ASD	196
4tjsc	ST	TD	196
4tjsc	ST	TD	196
t12wyg	ST	TD	196
a21hcy	ST	ASD	196
t8lth	ST	TD	196
1tlhj	C	TD	196
4tjsc	C	TD	196
a20xmy	ST	ASD	196
t19zml	ST	TD	196
t7lzy	FAR	TD	196
13cl	ST	ASD	196
17xx	NR	ASD	196
5jhy	ST	ASD	196
2tzxm	C	TD	196
t10wlq	C	TD	196
t11lyy	ST	TD	196
t11lyy	ST	TD	196
t12wyg	ST	TD	196
t13xhy	NR	TD	196
t15xrc	C	TD	196
t11lyy	FAR	TD	196
t14zrc	NR	TD	196
t14zrc	ST	TD	196
t7lzy	NR	TD	196
16lfx	ST	ASD	197
17xx	C	ASD	197
18wx	ST	ASD	197
5jhy	ST	ASD	197
5jhy	C	ASD	197
a22cjr	ST	ASD	197
t19zml	FAR	TD	197
4tjsc	ST	TD	197
t14zrc	ST	TD	197
t8lth	ST	TD	197
15yy	C	ASD	197
16lfx	ST	ASD	197
2tzxm	C	TD	197
a20xmy	ST	ASD	197
t12wyg	ST	TD	197
t9wyt	ST	TD	197
13cl	ST	ASD	198
18wx	ST	ASD	198
6zxy	ST	ASD	198
4tjsc	ST	TD	198
t12wyg	ST	TD	198
t16arl	ST	TD	198
11pp	ST	ASD	198
6zxy	C	ASD	198
t12wyg	NR	TD	198
t12wyg	C	TD	198
t13xhy	FAR	TD	198
t16arl	ST	TD	198
t18lxz	ST	TD	198
t18lxz	ST	TD	198
t20llc	FAR	TD	198
t8lth	ST	TD	198
t8lth	ST	TD	198
t9wyt	C	TD	198
1tlhj	ST	TD	198
2tzxm	ST	TD	198
t12wyg	FAR	TD	198
14my	C	ASD	199
3ydc	ST	ASD	199
5jhy	FAR	ASD	199
6zxy	ST	ASD	199
2tzxm	ST	TD	199
2tzxm	ST	TD	199
a20xmy	ST	ASD	199
t12wyg	C	TD	199
t19zml	ST	TD	199
1tlhj	C	TD	199
15yy	FAR	ASD	199
1qhy	C	ASD	199
2zhc	ST	ASD	199
3ydc	C	ASD	199
5jhy	ST	ASD	199
t13xhy	FAR	TD	199
t6lcn	ST	TD	199
t9wyt	ST	TD	199
1tlhj	C	TD	199
t12wyg	C	TD	199
t12wyg	C	TD	199
t20llc	C	TD	199
13cl	ST	ASD	200
16lfx	NR	ASD	200
t18lxz	ST	TD	200
t12wyg	ST	TD	200
t13xhy	C	TD	200
t14zrc	C	TD	200
5tdxc	ST	TD	200
17xx	ST	ASD	200
t13xhy	FAR	TD	200
t15xrc	C	TD	200
t7lzy	FAR	TD	200
t15xrc	ST	TD	200
5tdxc	ST	TD	200
13cl	C	ASD	201
14my	NR	ASD	201
18wx	C	ASD	201
t10wlq	NR	TD	201
t17yyx	ST	TD	201
t8lth	ST	TD	201
t9wyt	ST	TD	201
4tjsc	ST	TD	201
a20xmy	ST	ASD	201
a22cjr	ST	ASD	201
t10wlq	C	TD	201
t8lth	ST	TD	201
13cl	ST	ASD	201
13cl	ST	ASD	201
15yy	NR	ASD	201
5jhy	C	ASD	201
14my	ST	ASD	202
5jhy	C	ASD	202
4tjsc	ST	TD	202
a22cjr	ST	ASD	202
t12wyg	ST	TD	202
t7lzy	ST	TD	202
t18lxz	C	TD	202
15yy	C	ASD	202
1tlhj	C	TD	202
t14zrc	ST	TD	202
t15xrc	ST	TD	202
t18lxz	NR	TD	202
14my	FAR	ASD	203
t11lyy	C	TD	203
t16arl	ST	TD	203
a21hcy	ST	ASD	203
t15xrc	C	TD	203
t17yyx	ST	TD	203
t18lxz	ST	TD	203
t20llc	ST	TD	203
t6lcn	ST	TD	203
t7lzy	ST	TD	203
t9wyt	ST	TD	203
2tzxm	C	TD	203
t11lyy	C	TD	203
t13xhy	NR	TD	203
a21hcy	ST	ASD	203
2tzxm	C	TD	203
t10wlq	C	TD	203
t14zrc	ST	TD	203
t6lcn	ST	TD	203
4zhj	ST	ASD	204
6zxy	C	ASD	204
6zxy	FAR	ASD	204
4tjsc	C	TD	204
t14zrc	C	TD	204
t9wyt	ST	TD	204
a21hcy	ST	ASD	204
t8lth	ST	TD	204
5tdxc	ST	TD	204
11pp	ST	ASD	204
18wx	C	ASD	204
t16arl	NR	TD	204
t8lth	FAR	TD	204
t12wyg	ST	TD	204
t9wyt	NR	TD	204
17xx	NR	ASD	205
5jhy	C	ASD	205
a22cjr	ST	ASD	205
t15xrc	C	TD	205
5tdxc	ST	TD	205
16lfx	ST	ASD	205
6zxy	ST	ASD	205
a22cjr	ST	ASD	205
t14zrc	ST	TD	205
t7lzy	ST	TD	205
t8lth	ST	TD	205
18wx	C	ASD	206
t12wyg	C	TD	206
t6lcn	ST	TD	206
t7lzy	ST	TD	206
a22cjr	ST	ASD	206
t14zrc	ST	TD	206
t6lcn	ST	TD	206
5tdxc	ST	TD	206
13cl	ST	ASD	206
16lfx	ST	ASD	206
a22cjr	ST	ASD	206
t10wlq	NR	TD	206
t12wyg	C	TD	206
t17yyx	C	TD	206
t18lxz	C	TD	206
a21hcy	ST	ASD	206
t9wyt	FAR	TD	206
t14zrc	C	TD	207
t14zrc	ST	TD	207
t15xrc	C	TD	207
t17yyx	ST	TD	207
t18lxz	ST	TD	207
t7lzy	NR	TD	207
16lfx	ST	ASD	207
16lfx	ST	ASD	207
5jhy	C	ASD	207
5jhy	C	ASD	207
t12wyg	C	TD	207
t15xrc	ST	TD	207
2tzxm	C	TD	207
t12wyg	C	TD	207
t20llc	FAR	TD	207
2tzxm	C	TD	208
a21hcy	NR	ASD	208
t14zrc	ST	TD	208
t19zml	ST	TD	208
13cl	ST	ASD	208
a21hcy	ST	ASD	208
t10wlq	ST	TD	208
5tdxc	C	TD	208
15yy	ST	ASD	209
18wx	ST	ASD	209
6zxy	C	ASD	209
6zxy	NR	ASD	209
5tdxc	ST	TD	209
a20xmy	ST	ASD	209
a20xmy	ST	ASD	209
t14zrc	ST	TD	209
a21hcy	ST	ASD	209
a21hcy	ST	ASD	209
a22cjr	ST	ASD	209
t19zml	FAR	TD	209
t9wyt	ST	TD	209
5tdxc	ST	TD	209
5tdxc	ST	TD	209
a22cjr	ST	ASD	209
t12wyg	NR	TD	209
a22cjr	ST	ASD	209
t11lyy	C	TD	209
t14zrc	C	TD	209
t16arl	FAR	TD	209
t17yyx	C	TD	209
t17yyx	C	TD	209
3ydc	ST	ASD	210
6zxy	NR	ASD	210
t16arl	FAR	TD	210
t7lzy	ST	TD	210
t8lth	ST	TD	210
5tdxc	C	TD	210
13cl	ST	ASD	210
14my	ST	ASD	210
14my	ST	ASD	210
15yy	C	ASD	210
a20xmy	ST	ASD	210
a20xmy	ST	ASD	210
t15xrc	FAR	TD	210
t20llc	C	TD	210
t9wyt	C	TD	210
15yy	C	ASD	211
2zhc	ST	ASD	211
2zhc	ST	ASD	211
5tdxc	C	TD	211
4tjsc	ST	TD	211
13cl	ST	ASD	211
14my	C	ASD	211
4zhj	ST	ASD	211
4zhj	ST	ASD	211
2tzxm	C	TD	211
4tjsc	C	TD	211
a21hcy	ST	ASD	211
18wx	FAR	ASD	212
t10wlq	ST	TD	212
2tzxm	C	TD	212
a21hcy	ST	ASD	212
t13xhy	ST	TD	212
t14zrc	ST	TD	212
t16arl	ST	TD	212
t18lxz	ST	TD	212
t8lth	ST	TD	212
13cl	ST	ASD	212
15yy	C	ASD	212
16lfx	ST	ASD	212
2zhc	ST	ASD	212
5tdxc	C	TD	212
t10wlq	C	TD	212
t13xhy	C	TD	212
t14zrc	ST	TD	212
t19zml	ST	TD	212
t6lcn	ST	TD	212
4tjsc	C	TD	212
t12wyg	C	TD	212
t12wyg	C	TD	212
t14zrc	ST	TD	212
t14zrc	C	TD	212
t19zml	ST	TD	212
13cl	ST	ASD	213
14my	FAR	ASD	213
5jhy	C	ASD	213
a22cjr	ST	ASD	213
t11lyy	NR	TD	213
t15xrc	FAR	TD	213
t6lcn	ST	TD	213
t8lth	ST	TD	213
a22cjr	ST	ASD	213
t13xhy	NR	TD	213
t17yyx	C	TD	213
t19zml	NR	TD	213
13cl	ST	ASD	213
2tzxm	C	TD	213
t15xrc	C	TD	213
a20xmy	C	ASD	213
t15xrc	ST	TD	213
t16arl	ST	TD	213
t9wyt	ST	TD	213
5tdxc	ST	TD	213
5jhy	C	ASD	214
6zxy	ST	ASD	214
4tjsc	C	TD	214
t14zrc	ST	TD	214
a22cjr	C	ASD	214
t9wyt	ST	TD	214
14my	ST	ASD	214
14my	ST	ASD	214
4zhj	ST	ASD	214
2tzxm	C	TD	214
4tjsc	NR	TD	214
a22cjr	ST	ASD	214
t10wlq	C	TD	214
t9wyt	C	TD	214
4tjsc	C	TD	214
t18lxz	NR	TD	214
t9wyt	C	TD	214
13cl	ST	ASD	215
13cl	ST	ASD	215
6zxy	FAR	ASD	215
t10wlq	C	TD	215
t10wlq	ST	TD	215
a21hcy	C	ASD	215
a21hcy	ST	ASD	215
a22cjr	NR	ASD	215
t15xrc	ST	TD	215
16lfx	ST	ASD	215
2zhc	ST	ASD	215
4zhj	ST	ASD	215
4tjsc	C	TD	215
t13xhy	ST	TD	215
t7lzy	NR	TD	215
t11lyy	C	TD	215
t20llc	FAR	TD	215
4zhj	ST	ASD	216
5jhy	C	ASD	216
t12wyg	ST	TD	216
t14zrc	C	TD	216
4tjsc	C	TD	216
t12wyg	C	TD	216
t12wyg	FAR	TD	216
t15xrc	ST	TD	216
t15xrc	ST	TD	216
t17yyx	ST	TD	216
t6lcn	ST	TD	216
t7lzy	C	TD	216
5tdxc	C	TD	216
18wx	C	ASD	216
6zxy	ST	ASD	216
6zxy	C	ASD	216
a20xmy	ST	ASD	216
t15xrc	C	TD	216
t15xrc	C	TD	216
t15xrc	NR	TD	216
5tdxc	ST	TD	216
16lfx	ST	ASD	217
5jhy	C	ASD	217
t16arl	ST	TD	217
a21hcy	ST	ASD	217
t6lcn	NR	TD	217
t18lxz	ST	TD	217
t6lcn	ST	TD	217
t9wyt	C	TD	217
5tdxc	C	TD	217
5jhy	ST	ASD	217
6zxy	C	ASD	217
t12wyg	NR	TD	217
t17yyx	C	TD	217
a21hcy	ST	ASD	217
a21hcy	ST	ASD	217
t10wlq	C	TD	217
t9wyt	C	TD	217
6zxy	ST	ASD	218
2tzxm	C	TD	218
4tjsc	FAR	TD	218
4tjsc	C	TD	218
t13xhy	FAR	TD	218
t9wyt	C	TD	218
11pp	ST	ASD	218
14my	C	ASD	218
t10wlq	C	TD	218
t10wlq	C	TD	218
t19zml	ST	TD	218
1tlhj	C	TD	218
t14zrc	ST	TD	218
t17yyx	NR	TD	218
14my	C	ASD	219
16lfx	ST	ASD	219
17xx	NR	ASD	219
2zhc	ST	ASD	219
6zxy	C	ASD	219
a22cjr	ST	ASD	219
t6lcn	ST	TD	219
13cl	ST	ASD	219
t10wlq	ST	TD	219
t14zrc	FAR	TD	219
t14zrc	C	TD	219
t9wyt	C	TD	219
a21hcy	ST	ASD	219
t13xhy	ST	TD	219
t17yyx	NR	TD	219
t9wyt	ST	TD	219
3ydc	FAR	ASD	220
6zxy	FAR	ASD	220
4tjsc	ST	TD	220
t19zml	C	TD	220
a21hcy	ST	ASD	220
2tzxm	FAR	TD	220
t19zml	NR	TD	220
16lfx	ST	ASD	220
6zxy	ST	ASD	220
a20xmy	FAR	ASD	220
a20xmy	ST	ASD	220
t10wlq	FAR	TD	220
1tlhj	C	TD	220
t7lzy	C	TD	220
t10wlq	C	TD	220
t19zml	ST	TD	220
13cl	C	ASD	221
14my	ST	ASD	221
16lfx	ST	ASD	221
6zxy	FAR	ASD	221
t12wyg	FAR	TD	221
t16arl	FAR	TD	221
t6lcn	ST	TD	221
t17yyx	C	TD	221
11pp	ST	ASD	221
2zhc	ST	ASD	221
4zhj	ST	ASD	221
a22cjr	C	ASD	221
t17yyx	C	TD	221
t19zml	ST	TD	221
a21hcy	ST	ASD	221
a20xmy	ST	ASD	221
t18lxz	ST	TD	221
t19zml	ST	TD	221
t20llc	ST	TD	221
14my	FAR	ASD	222
4zhj	ST	ASD	222
t8lth	FAR	TD	222
t9wyt	ST	TD	222
1tlhj	NR	TD	222
18wx	C	ASD	222
18wx	C	ASD	222
18wx	NR	ASD	222
5jhy	C	ASD	222
t16arl	ST	TD	222
1tlhj	NR	TD	222
t18lxz	ST	TD	222
14my	ST	ASD	223
4zhj	ST	ASD	223
5tdxc	ST	TD	223
a21hcy	ST	ASD	223
16lfx	ST	ASD	223
4zhj	ST	ASD	223
4zhj	ST	ASD	223
t10wlq	C	TD	223
t19zml	ST	TD	223
t7lzy	C	TD	223
5tdxc	ST	TD	223
14my	C	ASD	224
14my	C	ASD	224
4tjsc	ST	TD	224
5tdxc	C	TD	224
t15xrc	ST	TD	224
t17yyx	ST	TD	224
t20llc	NR	TD	224
t16arl	ST	TD	224
15yy	C	ASD	224
18wx	C	ASD	224
1qhy	C	ASD	224
4zhj	C	ASD	224
2tzxm	C	TD	224
t12wyg	C	TD	224
t14zrc	ST	TD	224
t17yyx	FAR	TD	224
13cl	NR	ASD	225
13cl	ST	ASD	225
3ydc	ST	ASD	225
t12wyg	C	TD	225
a21hcy	FAR	ASD	225
t7lzy	C	TD	225
t8lth	C	TD	225
4tjsc	ST	TD	225
a21hcy	FAR	ASD	225
t14zrc	ST	TD	225
14my	ST	ASD	225
2zhc	ST	ASD	225
t12wyg	C	TD	225
t14zrc	C	TD	225
t15xrc	ST	TD	225
t17yyx	C	TD	225
5tdxc	ST	TD	225
4zhj	ST	ASD	226
4zhj	ST	ASD	226
6zxy	ST	ASD	226
t10wlq	C	TD	226
t13xhy	C	TD	226
4tjsc	ST	TD	226
t17yyx	C	TD	226
t20llc	NR	TD	226
t7lzy	NR	TD	226
5tdxc	ST	TD	226
13cl	C	ASD	226
4zhj	NR	ASD	226
6zxy	ST	ASD	226
t15xrc	C	TD	226
t15xrc	FAR	TD	226
t17yyx	C	TD	226
t19zml	ST	TD	226
11pp	ST	ASD	227
2zhc	ST	ASD	227
3ydc	ST	ASD	227
4tjsc	NR	TD	227
4tjsc	C	TD	227
5tdxc	ST	TD	227
t14zrc	FAR	TD	227
t13xhy	FAR	TD	227
5tdxc	ST	TD	227
13cl	ST	ASD	227
16lfx	ST	ASD	227
t18lxz	C	TD	227
t9wyt	ST	TD	227
t13xhy	C	TD	227
3ydc	C	ASD	228
4zhj	ST	ASD	228
5jhy	C	ASD	228
4tjsc	ST	TD	228
a22cjr	ST	ASD	228
4tjsc	NR	TD	228
4tjsc	NR	TD	228
a22cjr	C	ASD	228
t14zrc	FAR	TD	228
t18lxz	ST	TD	228
t18lxz	C	TD	228
t20llc	NR	TD	228
t7lzy	C	TD	228
4zhj	ST	ASD	228
6zxy	NR	ASD	228
a20xmy	ST	ASD	228
t13xhy	FAR	TD	228
t15xrc	ST	TD	228
t19zml	ST	TD	228
5tdxc	C	TD	228
6zxy	NR	ASD	229
t17yyx	ST	TD	229
t9wyt	ST	TD	229
1qhy	C	ASD	229
a22cjr	ST	ASD	229
t18lxz	FAR	TD	229
a20xmy	ST	ASD	229
t16arl	NR	TD	229
18wx	C	ASD	230
5tdxc	ST	TD	230
t12wyg	NR	TD	230
a21hcy	FAR	ASD	230
t11lyy	C	TD	230
t12wyg	FAR	TD	230
18wx	FAR	ASD	230
t14zrc	C	TD	230
t9wyt	C	TD	230
t10wlq	NR	TD	230
t12wyg	ST	TD	230
t15xrc	ST	TD	230
11pp	ST	ASD	231
14my	C	ASD	231
6zxy	FAR	ASD	231
a20xmy	ST	ASD	231
t12wyg	C	TD	231
t15xrc	C	TD	231
t16arl	ST	TD	231
t6lcn	ST	TD	231
13cl	FAR	ASD	231
t16arl	FAR	TD	231
4tjsc	C	TD	231
t16arl	NR	TD	231
t7lzy	ST	TD	231
t9wyt	C	TD	231
5tdxc	ST	TD	232
1tlhj	C	TD	232
a21hcy	FAR	ASD	232
t15xrc	C	TD	232
t8lth	ST	TD	232
4zhj	ST	ASD	232
4tjsc	ST	TD	232
t15xrc	C	TD	232
t16arl	C	TD	232
4tjsc	C	TD	232
t10wlq	FAR	TD	232
t19zml	ST	TD	232
6zxy	ST	ASD	233
t8lth	C	TD	233
4tjsc	C	TD	233
17xx	ST	ASD	233
6zxy	ST	ASD	233
5tdxc	ST	TD	233
a20xmy	FAR	ASD	233
t6lcn	ST	TD	233
t15xrc	ST	TD	233
t9wyt	FAR	TD	233
4tjsc	C	TD	234
a21hcy	NR	ASD	234
t18lxz	C	TD	234
t19zml	FAR	TD	234
13cl	ST	ASD	234
18wx	C	ASD	234
18wx	NR	ASD	234
2tzxm	C	TD	234
5tdxc	ST	TD	234
a20xmy	FAR	ASD	234
4tjsc	NR	TD	234
t16arl	C	TD	234
13cl	ST	ASD	235
1qhy	C	ASD	235
4tjsc	C	TD	235
a22cjr	ST	ASD	235
t14zrc	C	TD	235
t17yyx	C	TD	235
t14zrc	FAR	TD	235
13cl	C	ASD	236
18wx	C	ASD	236
t7lzy	NR	TD	236
4tjsc	ST	TD	236
14my	C	ASD	236
18wx	C	ASD	236
1qhy	C	ASD	236
5tdxc	C	TD	236
t16arl	FAR	TD	236
t10wlq	NR	TD	236
6zxy	ST	ASD	237
5tdxc	C	TD	237
a21hcy	ST	ASD	237
t9wyt	C	TD	237
t15xrc	ST	TD	237
t6lcn	ST	TD	237
4zhj	ST	ASD	237
5tdxc	ST	TD	237
a22cjr	ST	ASD	237
t19zml	ST	TD	237
t19zml	NR	TD	237
t6lcn	FAR	TD	237
t9wyt	NR	TD	237
a22cjr	ST	ASD	237
t7lzy	C	TD	237
5tdxc	C	TD	237
16lfx	NR	ASD	238
3ydc	ST	ASD	238
5tdxc	C	TD	238
a20xmy	ST	ASD	238
t19zml	FAR	TD	238
15yy	FAR	ASD	238
t17yyx	FAR	TD	238
1tlhj	C	TD	238
a21hcy	ST	ASD	238
t16arl	FAR	TD	238
t6lcn	NR	TD	238
11pp	NR	ASD	239
2zhc	ST	ASD	239
t11lyy	FAR	TD	239
t15xrc	C	TD	239
t16arl	ST	TD	239
a21hcy	NR	ASD	239
1tlhj	C	TD	239
a22cjr	C	ASD	239
t12wyg	NR	TD	239
t19zml	NR	TD	239
t7lzy	FAR	TD	239
2zhc	C	ASD	239
4zhj	ST	ASD	239
4zhj	NR	ASD	239
5tdxc	ST	TD	239
a20xmy	ST	ASD	239
a21hcy	ST	ASD	239
t8lth	ST	TD	239
16lfx	ST	ASD	240
2tzxm	NR	TD	240
a21hcy	ST	ASD	240
t12wyg	NR	TD	240
t7lzy	C	TD	240
t7lzy	ST	TD	240
t7lzy	ST	TD	240
a20xmy	ST	ASD	240
13cl	C	ASD	241
16lfx	ST	ASD	241
2zhc	ST	ASD	241
2tzxm	C	TD	241
t7lzy	C	TD	241
14my	C	ASD	241
t15xrc	ST	TD	241
t9wyt	FAR	TD	241
t10wlq	C	TD	241
14my	C	ASD	242
3ydc	FAR	ASD	242
6zxy	C	ASD	242
6zxy	NR	ASD	242
t19zml	C	TD	242
4tjsc	C	TD	242
t10wlq	C	TD	242
t11lyy	NR	TD	242
t12wyg	C	TD	242
5jhy	FAR	ASD	243
4tjsc	ST	TD	243
t12wyg	NR	TD	243
t14zrc	FAR	TD	243
t16arl	NR	TD	243
a21hcy	FAR	ASD	243
t11lyy	NR	TD	243
t14zrc	C	TD	243
t15xrc	C	TD	243
t16arl	ST	TD	243
t9wyt	ST	TD	243
5tdxc	NR	TD	243
13cl	NR	ASD	244
t17yyx	ST	TD	244
t19zml	C	TD	244
4zhj	C	ASD	244
t17yyx	NR	TD	244
t19zml	ST	TD	245
t7lzy	NR	TD	245
t9wyt	C	TD	245
t20llc	C	TD	245
t8lth	C	TD	245
11pp	C	ASD	245
a20xmy	ST	ASD	245
t15xrc	C	TD	245
t6lcn	ST	TD	245
a20xmy	NR	ASD	245
t13xhy	NR	TD	245
5tdxc	C	TD	245
5tdxc	ST	TD	245
5tdxc	C	TD	245
1qhy	NR	ASD	246
6zxy	C	ASD	246
t16arl	ST	TD	246
a22cjr	ST	ASD	246
t15xrc	C	TD	246
t9wyt	ST	TD	246
16lfx	C	ASD	246
4zhj	FAR	ASD	246
a20xmy	ST	ASD	246
a20xmy	FAR	ASD	246
16lfx	C	ASD	247
4zhj	ST	ASD	247
4tjsc	C	TD	247
t12wyg	FAR	TD	247
t15xrc	ST	TD	247
t12wyg	C	TD	247
t15xrc	FAR	TD	247
t7lzy	C	TD	247
11pp	C	ASD	248
4zhj	ST	ASD	248
t19zml	FAR	TD	248
t7lzy	C	TD	248
t20llc	ST	TD	248
t8lth	ST	TD	248
17xx	FAR	ASD	248
4tjsc	FAR	TD	248
5tdxc	ST	TD	248
13cl	C	ASD	249
14my	FAR	ASD	249
a20xmy	ST	ASD	249
a20xmy	ST	ASD	249
a22cjr	ST	ASD	249
t11lyy	C	TD	249
t12wyg	FAR	TD	249
t14zrc	ST	TD	249
t16arl	NR	TD	249
t20llc	ST	TD	249
14my	C	ASD	250
t8lth	ST	TD	250
t14zrc	C	TD	250
t7lzy	FAR	TD	250
11pp	C	ASD	250
16lfx	FAR	ASD	250
[truncated: 1,316 more rows]
